# Supplementary material for: Development of 3-triazenylaryne and its application to iterative aryne reactions via o-triazenylarylboronic acids
Source: Royal Society of Chemistry journal article supplement (doi:10.1039/d3cc04878k), 2023-01-01

## Electronic Supplementary Information

### Development of 3-Triazenylaryne and Its Application to Iterative Aryne Reactions via *o*-Triazenylarylboronic Acids

Motoki Ito,<sup>\*</sup> Yuta Takishima, Rinto Ishikawa, Mao Kamimura, Hana Watanabe, Takehiro  
Konishi, Kazuhiro Higuchi, and Shigeo Sugiyama<sup>\*</sup>

*Meiji Pharmaceutical University, 2-522-1 Noshio Kiyose, Tokyo 204-8588, Japan*

mito@my-pharm.ac.jp  
sugiyama@my-pharm.ac.jp

## Experimental Section

**General.** All melting points were measured on a Yanagimoto micro melting point apparatus. IR spectra were recorded on a JASCO FT/IR-4100 spectrometer and absorbance bands are reported in wavenumber ( $\text{cm}^{-1}$ ).  $^1\text{H}$  NMR spectra were recorded on JEOL JNM-AL 300 (300 MHz) spectrometer or JEOL JNM-ECA 400 (400 MHz) spectrometer or JEOL JNM-ECZ 500 (500 MHz) spectrometer. Chemical shifts are reported relative to internal standard (tetramethylsilane at  $\delta_{\text{H}}$  0.00,  $\text{CDCl}_3$  at  $\delta_{\text{H}}$  7.26,  $\text{CD}_3\text{CN}$  at  $\delta_{\text{H}}$  1.94,  $\text{CD}_3\text{OD}$  at  $\delta_{\text{H}}$  3.31). Data are presented as follows: chemical shift ( $\delta$ , ppm), multiplicity (s = singlet, d = doublet, t = triplet, q = quartet, m = multiplet), coupling constant and integration.  $^{13}\text{C}$  NMR spectra were recorded on JEOL JNM-ECA 400 (100 MHz) spectrometer or JEOL JNM-ECZ 500 (125 MHz) spectrometer. Chemical shifts are reported relative to internal standard ( $\text{CDCl}_3$  at  $\delta$  77.00,  $\text{CD}_3\text{CN}$  at  $\delta$  118.26,  $\text{CD}_3\text{OD}$  at  $\delta$  49.00,). Mass spectra were recorded on JEOL JMS 700 (EI) or JEOL JMS-T100LC (ESI) instrument with a direct inlet system. Column chromatography was carried out on Kanto silica gel 60 N (spherical, neutral, particle size 40–50  $\mu\text{m}$ ) or MP Alumina N Super I (neutral, particle size 50–200  $\mu\text{m}$ ). Analytical thin layer chromatography (TLC) was carried out on Merck Kieselgel 60 F<sub>254</sub> plates with visualization by ultraviolet, anisaldehyde stain solution or phosphomolybdic acid stain solution. All non-aqueous reactions were carried out in flame-dried glassware under Ar atmosphere unless otherwise noted. Reagents and solvents were used without purification. *N*-Boc-3-aminophenol was synthesized from 3-aminophenol by a conventional *N*-Boc protection procedure. 3,17-*O*-Bis(*tert*-butyldimethylsilyl)-17 $\alpha$ -ethynylestradiol (**6d**)<sup>[1]</sup> and 6-phenylhexa-1,3-diyne (**6e**)<sup>[2]</sup> were synthesized according to the literature procedures.  $\text{TMSCH}_2\text{MgCl}$  (1.0 M in THF) was purchased from FUJIFILM Wako Pure Chemical Co. For aryne generation from *o*-triazenilarylboronic acids **2**, silica gel, which was the same as that used for column chromatography, was used after dryness under vacuum at 200 °C.

## 1. Preparation of 3-triazenylaryne precursor (1).

In the literature, the synthesis of 3-amino-2-iodotriflate (**S4**) from 2-amino-3-nitrophenol was reported through three step transformations including Sandmeyer reaction, triflation, and reduction of nitro group (Scheme S1a).<sup>[3,4]</sup> On the other hand, we prepared **S4** from *N*-Boc-amide **3**, which was prepared from *N*-Boc-3-aminophenol in four steps (Scheme S1b). 3-Triazenylaryne precursor **1** was obtained from **3** via removal of Boc group and triazene formation. The experimental procedure of our method (Scheme S1b) is described below.

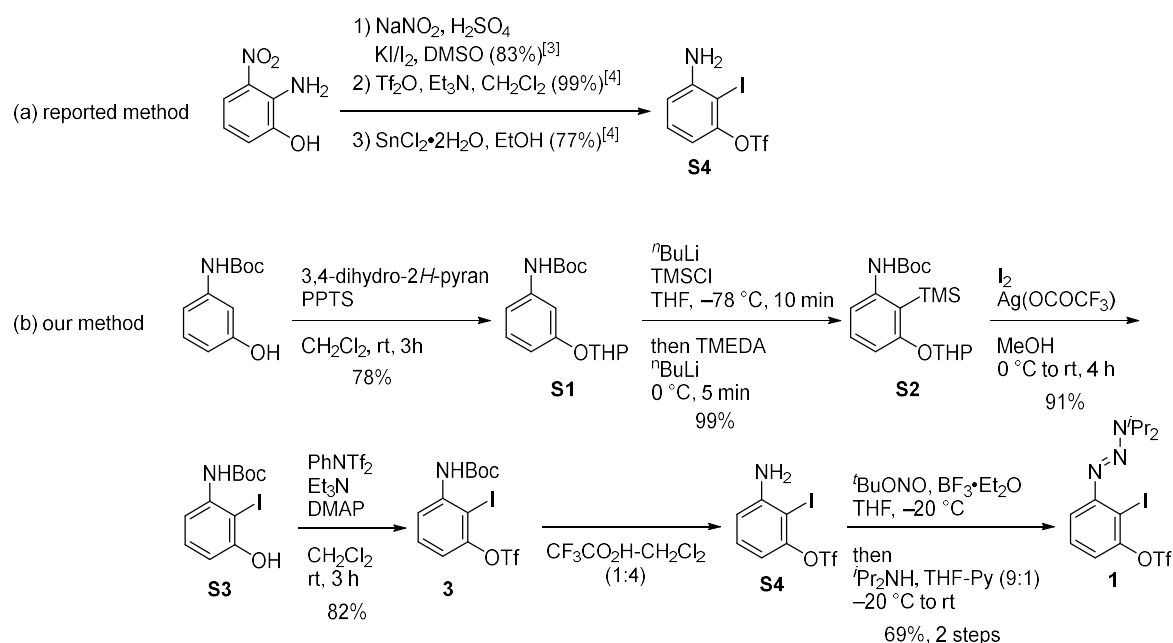

Scheme S1

To a solution of *N*-Boc-3-aminophenol (6.01 g, 28.7 mmol) in  $\text{CH}_2\text{Cl}_2$  (287 mL) was added 3,4-dihydro-2*H*-pyran (3.11 mL, 34.4 mmol) and PPTS (1.44 g, 5.74 mmol) at 0 °C. After stirring at room temperature for 3 hours, the reaction mixture was concentrated in vacuo, and the crude product was purified by column chromatography (silica gel, 5:1 *n*-hexane/AcOEt) to give **S1** (6.11 g, 78%) as a colorless solid: mp 104–106 °C; IR (KBr)  $\nu$  2930, 1714, 1605, 1539, 1159, 911  $\text{cm}^{-1}$ ;  $^1\text{H}$  NMR (400 MHz,  $\text{CDCl}_3$ ):  $\delta$  1.51 (s, 9H, *t*-Bu), 1.59–1.70 (m, 3H, THP), 1.82–1.86 (m, 2H, THP), 1.95–2.05 (m, 1H, THP), 3.57–3.63 (m, 1H, –OCHH–), 3.90 (ddd,  $J = 3.2, 10.0, 11.2$  Hz, 1H, –OCHH–), 5.42 (t,  $J = 3.2$  Hz, 1H, –OCHO–), 6.44 (brs, 1H, *NHBoc*), 6.73 (dd,  $J = 2.4, 8.2$  Hz, 1H, *ArH*), 6.92 (d,  $J = 6.8$  Hz, 1H, *ArH*), 7.15–7.19 (m, 2H, *ArH*);  $^{13}\text{C}$  NMR (100 MHz,  $\text{CDCl}_3$ ):  $\delta$  18.5 ( $\text{CH}_2$ ), 25.1 ( $\text{CH}_2$ ), 28.2 ( $\text{CH}_3$ ), 30.2 ( $\text{CH}_2$ ), 61.7 ( $\text{CH}_2$ ), 80.2 (C), 96.1 (CH), 106.9 (CH), 110.8 (CH), 111.6 (CH), 129.4 (CH), 139.4 (C), 152.6 (C), 157.6 (C=O); HRMS (EI) calcd for  $\text{C}_{16}\text{H}_{23}\text{NO}_4$   $[\text{M}]^+$  293.1627, found 293.1625.

To a solution of **S1** (5.33 g, 18.2 mmol) in THF (73 mL) was added <sup>n</sup>BuLi (1.6 M in *n*-hexane, 25.0 mL, 40.0 mmol) at  $-78$  °C. After stirring at the same temperature for 10 min, TMSCl (5.05 mL, 40.0 mmol) was added. After stirring at the same temperature for 10 min, TMEDA (6.50 mL, 43.6 mmol) and <sup>n</sup>BuLi (1.6 M in *n*-hexane, 27.3 mL, 43.6 mmol) were added, and dry ice/MeOH bath was replaced by ice water bath. After stirring at 0 °C for 5 min, the reaction was quenched with 1 M HCl, and the whole mixture was extracted with AcOEt. The combined organic layers were successively washed with brine and dried over anhydrous Na<sub>2</sub>SO<sub>4</sub>. Filtration and evaporation in vacuo furnished the crude mixture, which was purified by column chromatography (silica gel, 10:1 *n*-hexane/AcOEt) to give **S2** (6.64 g, 99%) as a colorless solid: mp 81–83 °C; IR (KBr)  $\nu$  2941, 1732, 1220, 1157, 983 cm<sup>-1</sup>; <sup>1</sup>H NMR (400 MHz, CDCl<sub>3</sub>):  $\delta$  0.40 (s, 9H, Si(CH<sub>3</sub>)<sub>3</sub>), 1.50 (s, 9H, *t*-Bu), 1.59–1.74 (m, 3H, THP), 1.85–2.02 (m, 3H, THP), 3.61–3.65 (m, 1H, –OCHH–), 3.85–3.91 (m, 1H, –OCHH–), 5.39 (t,  $J$  = 3.2 Hz, 1H, –OCHO–), 6.71 (brs, 1H, *NHBoc*), 6.91 (d,  $J$  = 8.0 Hz, 1H, *ArH*), 7.25 (t,  $J$  = 8.0 Hz, 1H, *ArH*), 7.36 (d,  $J$  = 8.0 Hz, 1H, *ArH*); <sup>13</sup>C NMR (100 MHz, CDCl<sub>3</sub>):  $\delta$  1.9 (CH<sub>3</sub>), 19.0 (CH<sub>2</sub>), 25.1 (CH<sub>2</sub>), 28.4 (CH<sub>3</sub>), 30.3 (CH<sub>2</sub>), 62.0 (CH<sub>2</sub>), 79.9 (C), 96.8 (CH), 109.2 (CH), 116.3 (CH), 117.9 (C), 131.0 (CH), 143.4 (C), 153.3 (C), 162.8 (C=O); HRMS (EI) calcd for C<sub>19</sub>H<sub>31</sub>NO<sub>4</sub>Si [M]<sup>+</sup> 365.2022, found 365.2020.

To a solution of **S2** (6.13 g, 16.7 mmol) in CH<sub>2</sub>Cl<sub>2</sub> (56 mL) was added Ag(OCOCF<sub>3</sub>) (4.45 g, 20.0 mmol) and I<sub>2</sub> (5.09 g, 20.0 mmol) at 0 °C. After stirring at the same temperature for 1 hour and then at room temperature for 3 hours, the reaction was quenched with aqueous 10% Na<sub>2</sub>S<sub>2</sub>O<sub>3</sub> solution, and the whole mixture was filtered through a pad of Celite. The filtrate was extracted with Et<sub>2</sub>O and the combined organic layers were successively washed with brine and dried over anhydrous Na<sub>2</sub>SO<sub>4</sub>. Filtration and evaporation in vacuo furnished the crude mixture, which was purified by column chromatography (silica gel, 10:1 *n*-hexane/AcOEt) to give **S3** (5.14 g, 91%) as a beige solid: mp 113–115 °C; IR (KBr)  $\nu$  2980, 1698, 1525, 1466, 1157 cm<sup>-1</sup>; <sup>1</sup>H NMR (400 MHz, CDCl<sub>3</sub>):  $\delta$  1.53 (s, 9H, *t*-Bu), 5.65 (brs, 1H, *OH*), 6.66 (dd,  $J$  = 1.2, 8.0 Hz, 1H, *ArH*), 6.75 (brs, 1H, *NHBoc*), 7.15 (t,  $J$  = 8.0 Hz, 1H, *ArH*), 7.54 (dd,  $J$  = 1.2, 8.0 Hz, 1H, *ArH*); <sup>13</sup>C NMR (100 MHz, CDCl<sub>3</sub>):  $\delta$  28.2 (CH<sub>3</sub>), 81.2 (C), 81.4 (C), 109.9 (CH), 112.7 (CH), 129.8 (CH), 139.4 (C), 152.6 (C), 155.1 (C=O); HRMS (EI) calcd for C<sub>11</sub>H<sub>14</sub>INO<sub>3</sub> [M]<sup>+</sup> 335.0018, found 335.0017.

To a solution of **S3** (4.80 g, 14.3 mmol) in CH<sub>2</sub>Cl<sub>2</sub> (57 mL) was added PhNTf<sub>2</sub> (5.61 g, 15.7 mmol), Et<sub>3</sub>N (5.98 mL, 42.9 mmol), and DMAP (175 mg, 1.43 mmol) at room temperature. After stirring at the same temperature for 3 hours, the reaction mixture was concentrated in vacuo, and the crude product was purified by column chromatography (silica gel, 5:1 *n*-hexane/AcOEt) to give **3** (5.49 g, 82%) as a colorless solid: mp 103–105 °C; IR

(KBr)  $\nu$  1738, 1514, 1410, 1220, 1154  $\text{cm}^{-1}$ ;  $^1\text{H}$  NMR (300 MHz,  $\text{CDCl}_3$ ):  $\delta$  1.55 (s, 9H, *t*-Bu), 7.01 (dd,  $J = 1.2, 8.2$  Hz, 1H, ArH), 7.04 (brs, 1H, NHBoc), 7.38 (t,  $J = 8.2$  Hz, 1H, ArH), 8.13 (dd,  $J = 1.2, 8.2$  Hz, 1H, ArH);  $^{13}\text{C}$  NMR (100 MHz,  $\text{CDCl}_3$ ):  $\delta$  28.2 ( $\text{CH}_3$ ), 81.9 (C), 84.6 (C), 115.8 (CH), 118.6 (q,  $J = 319$  Hz,  $\text{CF}_3$ ), 118.9 (CH), 130.2 (CH), 141.7 (C), 150.1 (C), 152.2 (C=O); HRMS (EI) calcd for  $\text{C}_{12}\text{H}_{13}\text{F}_3\text{INO}_5\text{S}$   $[\text{M}]^+$  466.9511, found 466.9514.

To a solution of **3** (4.64 g, 9.93 mmol) in  $\text{CH}_2\text{Cl}_2$  (20 mL) was added  $\text{CF}_3\text{CO}_2\text{H}$  (5.0 mL) at 0 °C. After stirring at room temperature for 3 hours, the reaction mixture was concentrated in vacuo, and the crude amine **S4** was used without further purification. To a solution of crude amine **S4** in THF (5.0 mL) was added  $\text{BF}_3 \cdot \text{Et}_2\text{O}$  (1.88 mL, 14.9 mmol) and  $t\text{BuONO}$  (1.77 mL, 14.9 mmol) at  $-20$  °C. After stirring at the same temperature overnight, the formed precipitates were collected by suction and washed with  $\text{Et}_2\text{O}$  to give crude diazonium salt. The crude diazonium salt was added to a solution of  $i\text{Pr}_2\text{NH}$  (4.18 mL, 29.7 mmol) in THF–pyridine (9:1, 13.2 mL) at  $-20$  °C, and the mixture was allowed to warm to room temperature. After stirring overnight, the reaction was quenched with saturated aqueous  $\text{NH}_4\text{Cl}$ , and the whole mixture was extracted with AcOEt. The combined organic layers were successively washed with brine and dried over anhydrous  $\text{Na}_2\text{SO}_4$ . Filtration and evaporation in vacuo furnished the crude product, which was purified by column chromatography (silica gel, 10:1 *n*-hexane/AcOEt) to give triazene **1** (3.30 g, 69%) as a yellow oil: IR (KBr)  $\nu$  2978, 1403, 1213, 1140, 967  $\text{cm}^{-1}$ ;  $^1\text{H}$  NMR (400 MHz,  $\text{CDCl}_3$ ):  $\delta$  1.33 (d,  $J = 6.8$  Hz, 6H,  $\text{CH}(\text{CH}_3)_2$ ), 1.38 (d,  $J = 6.8$  Hz, 6H,  $\text{CH}(\text{CH}_3)_2$ ), 4.05 (septet,  $J = 6.8$  Hz, 1H,  $\text{CH}(\text{CH}_3)_2$ ), 5.18 (septet,  $J = 6.8$  Hz, 1H,  $\text{CH}(\text{CH}_3)_2$ ), 7.02 (d,  $J = 8.0$  Hz, 1H, ArH), 7.28 (t,  $J = 8.0$  Hz, 1H, ArH), 7.35 (dd,  $J = 1.2, 8.0$  Hz, 1H, ArH);  $^{13}\text{C}$  NMR (100 MHz,  $\text{CDCl}_3$ ):  $\delta$  18.9 ( $\text{CH}_3$ ), 23.6 ( $\text{CH}_3$ ), 48.3 (CH), 50.4 (CH), 92.1 (C), 116.3 (CH), 117.0 (CH), 118.8 (q,  $J = 319$  Hz,  $\text{CF}_3$ ), 129.3 (CH), 151.0 (C), 153.7 (C); HRMS (EI) calcd for  $\text{C}_{13}\text{H}_{17}\text{F}_3\text{IN}_3\text{O}_3\text{S}$   $[\text{M}]^+$  478.9987, found 478.9986.

## 2. Optimization of Reaction Conditions for 3-Triazenylaryne Generation from 1

Table S1

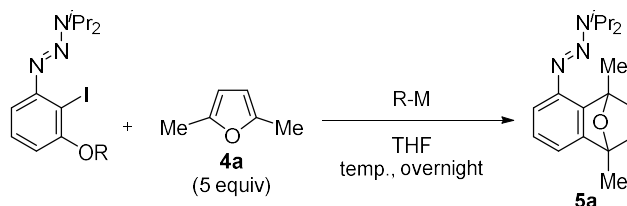

| entry | substrate                                                                         | R-M                                 | temp (°C) | yield (%) |
|-------|-----------------------------------------------------------------------------------|-------------------------------------|-----------|-----------|
| 1     | R = Tf ( <b>1</b> )                                                               | <sup>t</sup> BuLi (2.0 equiv)       | -78       | 9         |
| 2     | R = Tf ( <b>1</b> )                                                               | <sup>i</sup> PrMgCl (1.5 equiv)     | -30       | 16        |
| 3     | R = Tf ( <b>1</b> )                                                               | TMSCH <sub>2</sub> MgCl (1.5 equiv) | -30       | 17        |
| 4     | R = Tf ( <b>1</b> )                                                               | TMSCH <sub>2</sub> MgCl (3.0 equiv) | -30       | 34        |
| 5     | R = Tf ( <b>1</b> )                                                               | TMSCH <sub>2</sub> MgCl (5.0 equiv) | -30       | 64        |
| 6     | R = Tf ( <b>1</b> )                                                               | TMSCH <sub>2</sub> MgCl (5.0 equiv) | rt        | 91        |
| 7     | R = Ts ( <b>S5</b> )                                                              | TMSCH <sub>2</sub> MgCl (5.0 equiv) | rt        | trace     |
| 8     | R = 4-ClC <sub>6</sub> H <sub>4</sub> SO <sub>2</sub> ( <b>S6</b> )               | TMSCH <sub>2</sub> MgCl (5.0 equiv) | rt        | 59        |
| 9     | R = 4-O <sub>2</sub> NC <sub>6</sub> H <sub>4</sub> SO <sub>2</sub> ( <b>S7</b> ) | TMSCH <sub>2</sub> MgCl (5.0 equiv) | rt        | ND*       |

\* Removal of arylsulfonyl group occurred, and 2-iodo-3-triazenylphenol was obtained in 74% yield.

## 2. General Procedure for Reactions of 1 and Arynophiles using TMSCH<sub>2</sub>MgCl

To a solution of **1** (1.00 equiv.) in THF (0.10 M) was added arynophile **4** (5 equiv.) and TMSCH<sub>2</sub>MgCl (1.0 M in THF, 5–10 equiv.) at room temperature. After stirring at the same temperature overnight, the reaction was quenched with water, and the whole mixture was extracted with AcOEt. The combined organic layers were successively washed with brine and dried over anhydrous Na<sub>2</sub>SO<sub>4</sub>. Filtration and evaporation in vacuo furnished the crude mixture, which was purified by column chromatography.

### 1-(1,4-Dimethyl-1,4-dihydro-1,4-epoxynaphthalen-5-yl)-3,3-diisopropyltriaz-1-ene (**5a**)

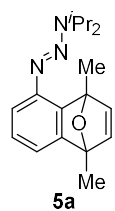

The reaction was performed using **1** (47.9 mg, 0.100 mmol), 2,5-dimethylfuran (**4a**, 49.0 μL, 0.500 mmol) and TMSCH<sub>2</sub>MgCl (1.0 M in THF, 0.50 mL, 0.500 mmol), and **5a** (27.2 mg, 91%) was obtained as a yellow oil after purification by column chromatography (silica gel, 10:1 *n*-hexane/AcOEt): IR (KBr)  $\nu$  2974, 1600, 1408, 1245, 1152, 858 cm<sup>-1</sup>; <sup>1</sup>H NMR (400 MHz, CDCl<sub>3</sub>):  $\delta$  1.30 (broad doublet, 12H, CH(CH<sub>3</sub>)<sub>2</sub>), 1.87 (s, 3H, CH<sub>3</sub>), 2.09 (s, 3H, CH<sub>3</sub>), 4.12 (broad, 1H, CH(CH<sub>3</sub>)<sub>2</sub>), 4.99 (broad, 1H, CH(CH<sub>3</sub>)<sub>2</sub>), 6.72 (d, *J* = 5.2 Hz, 1H, CH=CH), 6.82–6.91 (m, 3H, CH=CH and ArH), 7.11 (d, *J* = 8.0 Hz, 1H, ArH); <sup>13</sup>C NMR (100 MHz, CDCl<sub>3</sub>):  $\delta$  15.3 (CH<sub>3</sub>), 18.3 (CH<sub>3</sub>), 20.6 (CH<sub>3</sub>), 22.9 (CH<sub>3</sub>), 47.3 (CH×2), 88.2 (C), 90.0 (C), 114.4 (CH), 114.7 (CH), 125.5 (CH), 143.9 (C), 145.0 (C), 146.4 (CH), 147.3 (CH), 154.4 (C); HRMS (EI) calcd for C<sub>18</sub>H<sub>25</sub>N<sub>3</sub>O [M]<sup>+</sup> 299.1998, found 299.2000.

### 3-(3,3-Diisopropyltriaz-1-en-1-yl)-*N,N*-diethylaniline (**5b**)

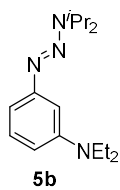

The reaction was performed using **1** (95.8 mg, 0.200 mmol), diethylamine (**4b**, 104  $\mu$ L mg, 1.00 mmol) and TMSCH<sub>2</sub>MgCl (1.0 M in THF, 2.0 mL, 2.00 mmol), and **5b** (31.8 mg, 58%) was obtained as a yellow oil after purification by column chromatography (silica gel, 20:1 *n*-hexane/AcOEt): IR (KBr)  $\nu$  2971, 1596, 1422, 1224, 1153, 1022  $\text{cm}^{-1}$ ; <sup>1</sup>H NMR (300 MHz, CDCl<sub>3</sub>):  $\delta$  1.18 (t,  $J$  = 7.2 Hz, 6H, CH<sub>2</sub>CH<sub>3</sub>), 1.30 (d,  $J$  = 6.6 Hz, 12H, CH(CH<sub>3</sub>)<sub>2</sub>), 3.37 (q,  $J$  = 7.2 Hz, 4H, CH<sub>2</sub>CH<sub>3</sub>), 4.63 (broad, 2H, CH(CH<sub>3</sub>)<sub>2</sub>), 6.48 d(d,  $J$  = 2.7, 8.1 Hz, 1H, ArH), 6.75–6.80 (m, 2H, ArH), 7.16 (t,  $J$  = 8.1 Hz, 1H, ArH); <sup>13</sup>C NMR (100 MHz, CDCl<sub>3</sub>):  $\delta$  12.7 (CH<sub>3</sub>), 21.7 (CH<sub>3</sub>), 44.5 (CH<sub>2</sub>), 47.2 (CH), 105.3 (CH), 108.1 (CH), 109.4 (CH), 129.3 (CH), 148.8 (C), 153.0 (C); HRMS (EI) calcd for C<sub>16</sub>H<sub>28</sub>N<sub>4</sub> [M]<sup>+</sup> 276.2314, found 276.2311.

### 1-[(*tert*-Butyldimethylsilyloxy)]-6-(3,3-diisopropyltriaz-1-en-1-yl)-1-methoxy benzocyclobutene (**5c**)

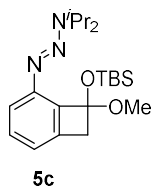

The reaction was performed using **1** (479 mg, 1.00 mmol), 1-(*tert*-butyldimethylsilyloxy)-1-methoxyethene (**4c**, 1.08 mL, 5.00 mmol) and TMSCH<sub>2</sub>MgCl (1.0 M in THF, 10 mL, 10.0 mmol), and **5c** (248 mg, 63%) was obtained as a yellow oil after purification by column chromatography (silica gel, 20:1 *n*-hexane/AcOEt): IR (KBr)  $\nu$  2930, 1600, 1403, 1247, 1137  $\text{cm}^{-1}$ ; <sup>1</sup>H NMR (400 MHz, CDCl<sub>3</sub>):  $\delta$  -0.08 (s, 3H, Si(CH<sub>3</sub>)(CH<sub>3</sub>)), -0.06 (s, 3H, Si(CH<sub>3</sub>)(CH<sub>3</sub>)), 0.85 (s, 9H, *t*-Bu), 1.19 (broad, 6H, CH(CH<sub>3</sub>)<sub>2</sub>), 1.33 (broad, 6H, CH(CH<sub>3</sub>)<sub>2</sub>), 3.28 (d,  $J$  = 14.0 Hz, 1H, ArCHH), 3.44 (d,  $J$  = 14.0 Hz, 1H, ArCHH), 3.53 (s, 3H, OCH<sub>3</sub>), 3.94 (broad, 1H, CH(CH<sub>3</sub>)<sub>2</sub>), 5.22 (broad, 1H, CH(CH<sub>3</sub>)<sub>2</sub>), 6.86–6.90 (m, 1H, ArH), 7.18–7.22 (m, 2H, ArH); <sup>13</sup>C NMR (100 MHz, CDCl<sub>3</sub>):  $\delta$  -4.10 (CH<sub>3</sub>), -3.82 (CH<sub>3</sub>), 18.0 (C), 19.3 (CH<sub>3</sub>), 23.8 (CH<sub>3</sub>), 25.7 (CH<sub>3</sub>), 46.0 (CH), 47.8 (CH<sub>2</sub>), 49.1 (CH), 52.8 (CH<sub>3</sub>), 103.3 (C), 116.3 (CH), 119.4 (CH), 130.4 (CH), 139.8 (C), 141.8 (C), 144.9 (C); HRMS (EI) calcd for C<sub>21</sub>H<sub>37</sub>N<sub>3</sub>O<sub>2</sub>Si [M]<sup>+</sup> 391.2655, found 391.2656.

The regioselectivity was verified by NOE correlation between C2–H and C3–H of corresponding benzocyclobuten-1-one **S8**.

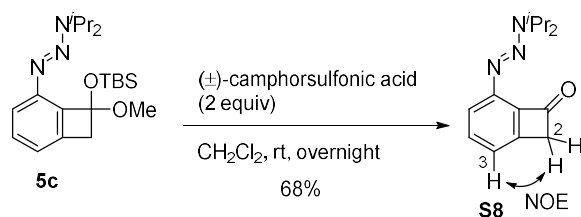

To a solution of **5c** (29.5 mg, 0.0750 mmol) in CH<sub>2</sub>Cl<sub>2</sub> (0.75 mL) was added (±)-

camphorsulfonic acid (35.0 mg, 0.150 mmol) at room temperature. After stirring at the same temperature overnight, the reaction was quenched with aqueous sat. NaHCO<sub>3</sub> solution, and the whole mixture was extracted with AcOEt. The combined organic layers were successively washed with brine and dried over anhydrous Na<sub>2</sub>SO<sub>4</sub>. Filtration and evaporation in vacuo furnished the crude mixture, which was purified by column chromatography (silica gel, 20:1 *n*-hexane/AcOEt) to give benzocyclobuten-1-one **S8** (12.6 mg, 68%) as a colorless oil: IR (KBr)  $\nu$  2970, 1764, 1375, 1248, 1152 cm<sup>-1</sup>; <sup>1</sup>H NMR (400 MHz, CDCl<sub>3</sub>):  $\delta$  1.25 (d, *J* = 6.8 Hz, 6H, CH(CH<sub>3</sub>)<sub>2</sub>), 1.49 (d, *J* = 6.8 Hz, 6H, CH(CH<sub>3</sub>)<sub>2</sub>), 3.88 (s, 2H, ArCH<sub>2</sub>O), 4.06 (septet, 1H, *J* = 6.8 Hz, CH(CH<sub>3</sub>)<sub>2</sub>), 5.41 (septet, *J* = 6.8 Hz, 1H, CH(CH<sub>3</sub>)<sub>2</sub>), 7.14 (d, *J* = 8.0 Hz, 1H, Ar*H*), 7.29 (d, *J* = 8.0 Hz, 1H, Ar*H*), 7.46 (t, *J* = 8.0 Hz, 1H, Ar*H*); <sup>13</sup>C NMR (100 MHz, CDCl<sub>3</sub>):  $\delta$  19.3 (CH<sub>3</sub>), 23.3 (CH<sub>3</sub>), 46.5 (CH), 49.9 (CH), 51.5 (CH<sub>2</sub>), 118.1 (CH), 121.7 (CH), 136.2 (CH), 137.1 (C), 146.4 (C), 151.4 (C), 186.4 (C=O); HRMS (EI) calcd for C<sub>14</sub>H<sub>19</sub>N<sub>3</sub>O [M]<sup>+</sup> 245.1528, found 245.1527.

**2-(*tert*-Butyl)-4-(3,3-diisopropyltriaz-1-en-1-yl)-3-phenyl-2,3-dihydrobenzo[*d*]isoxazole (5d)**

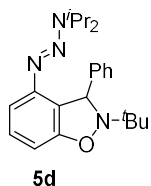

The reaction was performed using **1** (479 mg, 1.00 mmol), *N*-*tert*-butyl- $\alpha$ -phenylnitron (4d, 886 mg, 5.00 mmol) and TMSCH<sub>2</sub>MgCl (1.0 M in THF, 10 mL, 10.0 mmol), and **5d** (217 mg, 57%) was obtained as a red-brown solid after purification by column chromatography (silica gel, 20:1 *n*-hexane/AcOEt): mp 78–81 °C ; IR (KBr)  $\nu$  2972, 1594, 1407, 1240, 1007 cm<sup>-1</sup>; <sup>1</sup>H NMR (400 MHz, CD<sub>3</sub>CN):  $\delta$  1.16 (s, 9H, *t*-Bu), 1.22 (d, *J* = 6.4 Hz, 12H, CH(CH<sub>3</sub>)<sub>2</sub>), 4.13 (broad, 1H, CH(CH<sub>3</sub>)<sub>2</sub>), 4.93 (broad, 1H, CH(CH<sub>3</sub>)<sub>2</sub>), 5.84 (s, 1H, ArCHN), 6.56 (d, *J* = 8.0 Hz, 1H, Ar*H*), 6.90 (d, *J* = 8.0 Hz, 1H, Ar*H*), 7.13–7.19 (m, 2H, Ar*H*), 7.22–7.29 (m, 4H, Ar*H*); <sup>13</sup>C NMR (100 MHz, CD<sub>3</sub>OD):  $\delta$  19.3 (CH<sub>3</sub>), 24.0 (CH<sub>3</sub>), 25.8 (CH<sub>3</sub>), 47.4 (CH), 50.2 (CH), 62.7 (C), 67.4 (CH), 103.1 (CH), 112.1 (CH), 122.1 (C), 128.2 (CH), 129.2 (CH $\times$ 2), 130.6 (CH), 144.4 (C), 148.4 (C), 159.9 (C); HRMS (EI) calcd for C<sub>23</sub>H<sub>32</sub>N<sub>4</sub>O [M]<sup>+</sup> 380.2576, found 380.2572.

The regioselectivity was verified by NOE correlation between C3–H and alkenyl proton of compound **S11**. For the synthesis of **S11**, see next section.

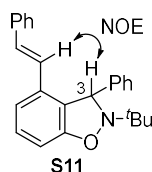



**1-(1-*tert*-Butyl-1,4-dihydro-1,4-epoxynaphthalen-5-yl)-3,3-diisopropyltriaz-1-ene (5e)**  
**and 1-(4-*tert*-Butyl-1,4-dihydro-1,4-epoxynaphthalen-5-yl)-3,3-diisopropyltriaz-1-ene (5e')**

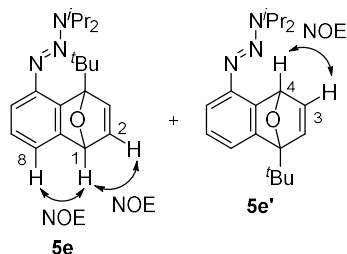

The reaction was performed using **1** (95.8 mg, 0.200 mmol), 2-*tert*-butylfuran (**4e**, 143  $\mu$ L, 1.00 mmol) and TMSCH<sub>2</sub>MgCl (1.0 M in THF, 2.0 mL, 2.00 mmol), and **5e** (24.5 mg, 37%) and **5e'** (16.1 mg, 25%) were obtained after purification by column chromatography (silica gel, 10:1 *n*-hexane/AcOEt then silica gel, CH<sub>2</sub>Cl<sub>2</sub>).

**5e**: a colorless oil; IR (KBr)  $\nu$  2973, 1409, 1225, 1155, 912, 746 cm<sup>-1</sup>; <sup>1</sup>H NMR (500 MHz, CDCl<sub>3</sub>):  $\delta$  1.29 (broad, 21H, CH(CH<sub>3</sub>)<sub>2</sub> and *t*-Bu), 4.04 (broad, 1H, CH(CH<sub>3</sub>)<sub>2</sub>), 5.28 (broad, 1H, CH(CH<sub>3</sub>)<sub>2</sub>), 6.03 (d,  $J$  = 2.0 Hz, 1H, -CH=CH-CH-), 6.94 (dd,  $J$  = 7.0, 8.0 Hz, 1H, ArH), 6.98 (d,  $J$  = 5.5 Hz, 1H, -CH=CH-CH-), 7.01 (dd,  $J$  = 1.0, 8.0 Hz, 1H, ArH), 7.07 (dd,  $J$  = 2.0, 5.5 Hz, 1H, -CH=CH-CH-), 7.17 (d,  $J$  = 7.0 Hz, 1H, ArH); <sup>13</sup>C NMR (125 MHz, CDCl<sub>3</sub>):  $\delta$  19.4 (CH<sub>3</sub>), 23.8 (CH<sub>3</sub>), 26.6 (CH<sub>3</sub>), 32.5 (C), 45.9 (CH), 48.4 (CH), 80.9 (CH), 99.3 (C), 118.2 (CH), 118.7 (CH), 125.0 (CH), 141.9 (C), 142.8 (CH), 144.3 (CH), 144.4 (C), 150.2 (C); HRMS (EI) calcd for C<sub>20</sub>H<sub>29</sub>N<sub>3</sub>O [M]<sup>+</sup> 327.2311, found 327.2313.

The structure of **5e** was verified by NOE correlations between C1-H and C2-H, and C1-H and C8-H.

**5e'**: a colorless oil; IR (KBr)  $\nu$  2975, 1427, 1222, 1154, 909 cm<sup>-1</sup>; <sup>1</sup>H NMR (500 MHz, CDCl<sub>3</sub>):  $\delta$  1.22–1.35 (m, 21H, CH(CH<sub>3</sub>)<sub>2</sub> and *t*-Bu), 3.96 (broad, 1H, CH(CH<sub>3</sub>)<sub>2</sub>), 5.43 (broad, 1H, CH(CH<sub>3</sub>)<sub>2</sub>), 5.61 (s, 1H, -CH=CH-CH-), 6.91 (dd,  $J$  = 7.0, 8.0 Hz, 1H, ArH), 6.96–6.97 (m, 3H, CH=CH and ArH), 7.11 (dd,  $J$  = 1.0, 7.0 Hz, 1H, ArH); <sup>13</sup>C NMR (125 MHz, CDCl<sub>3</sub>):  $\delta$  19.7 (CH<sub>3</sub>), 24.1 (CH<sub>3</sub>), 27.2 (CH<sub>3</sub>), 32.7 (C), 45.7 (CH), 48.0 (CH), 81.2 (CH), 102.8 (C), 115.8 (CH), 116.3 (CH), 125.6 (CH), 141.1 (C), 143.2 (CH), 143.6 (CH), 144.9 (C), 153.3 (C); HRMS (EI) calcd for C<sub>20</sub>H<sub>29</sub>N<sub>3</sub>O [M]<sup>+</sup> 327.2311, found 327.2313.

The structure of **5e'** was verified by NOE correlation between C3-H and C4-H.

### 3. Transformation of triazenyl group of **5d**.

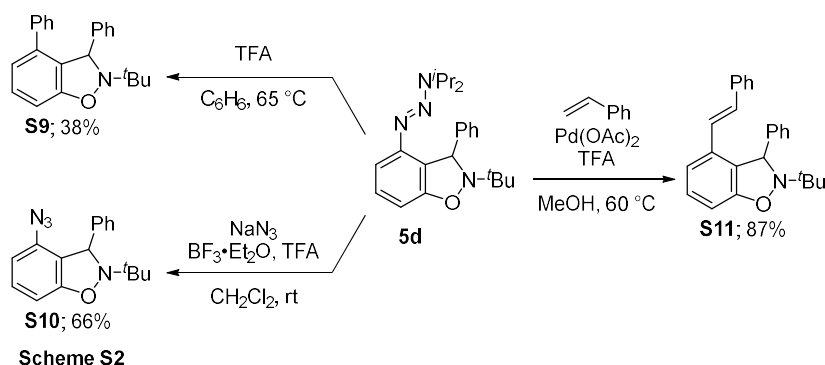

#### 2-(*tert*-Butyl)-3,4-diphenyl-2,3-dihydrobenzo[*d*]isoxazole (**S9**)

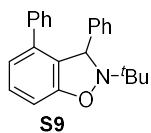

To a solution of **5d** (38.0 mg, 0.100 mmol) in C<sub>6</sub>H<sub>6</sub> (1.0 mL) was added CF<sub>3</sub>CO<sub>2</sub>H (15 μL, 0.200 mmol) at 65 °C. After stirring at the same temperature for 3 hours, the reaction was quenched with aqueous sat. NaHCO<sub>3</sub> solution, and the whole mixture was extracted with AcOEt. The combined organic layers were successively washed with brine and dried over anhydrous Na<sub>2</sub>SO<sub>4</sub>. Filtration and evaporation in vacuo furnished the crude mixture, which was purified by column chromatography (silica gel, 10:1 *n*-hexane/AcOEt) to give **S9** (12.6 mg, 38%) as an orange oil: IR (KBr)  $\nu$  2971, 1585, 1454, 1207, 756 cm<sup>-1</sup>; <sup>1</sup>H NMR (400 MHz, CD<sub>3</sub>OD):  $\delta$  1.10 (s, 9H, *t*-Bu), 5.67 (s, 1H, ArCHN), 6.71–6.78 (m, 4H, ArH), 6.95–6.98 (m, 5H, ArH), 7.12–7.21 (m, 4H, ArH); <sup>13</sup>C NMR (100 MHz, CD<sub>3</sub>OD):  $\delta$  25.7 (CH<sub>3</sub>), 62.7 (C), 67.7 (CH), 106.4 (CH), 123.1 (CH), 128.2 (CH), 128.3 (CH), 128.4 (C), 128.8 (CH), 129.1 (CH), 129.2 (CH×2), 130.6 (CH), 140.3 (C), 141.0 (C), 144.1 (C), 159.0 (C); HRMS (EI) calcd for C<sub>23</sub>H<sub>23</sub>NO [M]<sup>+</sup> 329.1780, found 329.1781.

#### 4-Azido-2-(*tert*-butyl)-3-phenyl-2,3-dihydrobenzo[*d*]isoxazole (**S10**)

**[CAUTION! Sodium azido produces explosive species under certain reaction conditions, and azido-containing compounds are presumed to be potentially explosive. Although we have never experienced such an explosion with azido compounds used in this study, all manipulations should be carefully carried out behind a safety shield in a hood.]**

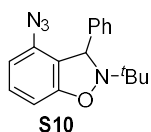

To a solution of **5d** (38.0 mg, 0.100 mmol) and NaN<sub>3</sub> (13.0 mg, 0.200 mmol) in CH<sub>2</sub>Cl<sub>2</sub> (1.0 mL) was added BF<sub>3</sub>·Et<sub>2</sub>O (25 μL, 0.200 mmol) and CF<sub>3</sub>CO<sub>2</sub>H (15 μL, 0.200 mmol) at room temperature. After stirring at the same temperature overnight, the reaction was quenched with water, and the whole mixture was extracted with Et<sub>2</sub>O. The combined organic layers were successively washed with brine and dried over anhydrous Na<sub>2</sub>SO<sub>4</sub>. Filtration and evaporation in vacuo

furnished the crude mixture, which was purified by column chromatography (silica gel, 20:1 *n*-hexane/AcOEt) to give **S10** (19.6 mg, 68%) as a brown solid: mp 101–103 °C; IR (KBr)  $\nu$  2972, 1602, 1455, 1302, 1200, 765  $\text{cm}^{-1}$ ;  $^1\text{H}$  NMR (400 MHz,  $\text{CDCl}_3$ ):  $\delta$  1.16 (s, 9H, *t*-Bu), 5.53 (s, 1H, ArCHN), 6.62 (d,  $J$  = 8.0 Hz, 2H, ArH), 7.20 (t,  $J$  = 8.0 Hz, 1H, ArH), 7.26–7.32 (m, 5H, ArH);  $^{13}\text{C}$  NMR (100 MHz,  $\text{CDCl}_3$ ):  $\delta$  25.3 (CH<sub>3</sub>), 61.5 (C), 65.1 (CH), 103.2 (CH), 110.5 (CH), 120.0 (C), 127.5 (CH), 127.6 (CH), 128.5 (CH), 130.3 (CH), 135.8 (C), 142.5 (C), 158.9 (C); HRMS (EI) calcd for C<sub>17</sub>H<sub>18</sub>N<sub>4</sub>O [M]<sup>+</sup> 294.1481, found 294.1478.

### 2-(*tert*-Butyl)-3-phenyl-4-styryl-2,3-dihydrobenzo[*d*]isoxazole (**S11**)

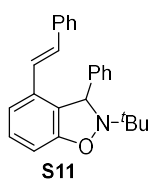

To a solution of **5d** (76.0 mg, 0.200 mmol) in MeOH (2.0 mL) was added Pd(OAc)<sub>2</sub> (4.5 mg, 0.0200 mmol, 10 mol%), styrene (46  $\mu\text{L}$ , 0.400 mmol), CF<sub>3</sub>CO<sub>2</sub>H (31  $\mu\text{L}$ , 0.400 mmol) at room temperature. After stirring at 65 °C for 1 hour, the reaction mixture was concentrated in vacuo, and the crude product was purified by column chromatography (silica gel, 10:1 *n*-hexane/AcOEt) to give **S11** (62.4 mg, 87%) as a colorless solid: mp 142–145 °C; IR (KBr)  $\nu$  2973, 1580, 1453, 1250, 963  $\text{cm}^{-1}$ ;  $^1\text{H}$  NMR (400 MHz,  $\text{CDCl}_3$ ):  $\delta$  1.20 (s, 9H, *t*-Bu), 5.69 (s, 1H, ArCHN), 6.76–6.81 (m, 2H, ArH and Ar-CH=CH-Ph), 6.93 (d,  $J$  = 16.0 Hz, 1H, Ar-CH=CH-Ph), 7.14 (d,  $J$  = 7.6 Hz, 1H, ArH), 7.20–7.35 (m, 11H, ArH);  $^{13}\text{C}$  NMR (100 MHz,  $\text{CDCl}_3$ ):  $\delta$  25.5 (CH<sub>3</sub>), 61.5 (C), 66.5 (CH), 105.6 (CH), 117.5 (CH), 124.7 (CH), 126.5 (CH), 126.9 (C), 127.7 (CH), 127.8 (CH), 128.0 (CH), 128.6 (CH), 128.8 (CH), 129.3 (CH), 130.4 (CH), 133.4 (C), 137.0 (C), 143.1 (C), 157.7(C); HRMS (EI) calcd for C<sub>25</sub>H<sub>25</sub>NO [M]<sup>+</sup> 355.1936, found 355.1937.

## 4. General Procedure for Iodoalkynylation of **1**

To a solution of alkyne **6** (2.10 equiv) in THF (5 mL for 1.00 mmol of **1**) was added *n*BuLi (1.6 M in *n*-hexane, 2.0 equiv) at –78 °C. After stirring at the same temperature for 10 min, to the reaction mixture was added a solution of **1** (1.00 equiv.) in THF (5 mL for 1.00 mmol of **1**) via cannula, and dry ice/MeOH bath was replaced by ice water bath. After stirring at 0 °C for 3 hours, the reaction was quenched with water, and the whole mixture was extracted with AcOEt. The combined organic layers were successively washed with brine and dried over anhydrous Na<sub>2</sub>SO<sub>4</sub>. Filtration and evaporation in vacuo furnished the crude mixture, which was purified by column chromatography to give **7**.

### 1-{2-Iodo-3-[(trimethylsilyl)ethynyl]phenyl}-3,3-diisopropyltriaz-1-ene (7a)

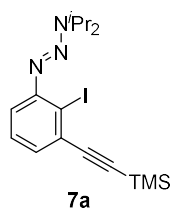

The reaction was performed using **1** (239 mg, 0.500 mmol), trimethylsilylacetylene (**6a**, 145  $\mu$ L, 1.05 mmol) and  $n$ BuLi (1.6 M in  $n$ -hexane, 0.625 mL, 1.00 mmol), and **7a** (144 mg, 68%) was obtained as a brown oil after purification by column chromatography (silica gel, 10:1  $n$ -hexane/AcOEt): IR (KBr)  $\nu$  2970, 2156, 1405, 1240, 844  $\text{cm}^{-1}$ ;  $^1\text{H}$  NMR (400 MHz,  $\text{CDCl}_3$ ):  $\delta$  0.30 (s, 9H,  $\text{Si}(\text{CH}_3)_3$ ), 1.33 (broad doublet, 6H,  $\text{CH}(\text{CH}_3)_2$ ), 1.38 (broad doublet, 6H,  $\text{CH}(\text{CH}_3)_2$ ), 4.04 (broad, 1H,  $\text{CH}(\text{CH}_3)_2$ ), 5.20 (broad, 1H,  $\text{CH}(\text{CH}_3)_2$ ), 7.16–7.27 (m, 3H, ArH);  $^{13}\text{C}$  NMR (100 MHz,  $\text{CDCl}_3$ ):  $\delta$  0.00 ( $\text{CH}_3$ ), 19.2 ( $\text{CH}_3$ ), 23.9 ( $\text{CH}_3$ ), 47.9 (CH), 50.0 (CH), 98.0 (C), 103.5 (C), 107.6 (C), 117.2 (CH), 128.1 (CH), 129.2 (CH), 130.7 (C), 151.8 (C); HRMS (EI) calcd for  $\text{C}_{17}\text{H}_{26}\text{IN}_3\text{Si}$   $[\text{M}]^+$  427.0941, found 427.0939.

### 1-[2-Iodo-3-(phenylethynyl)phenyl]-3,3-diisopropyltriaz-1-ene (7b)

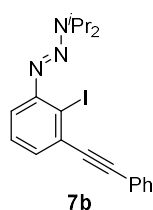

The reaction was performed using **1** (95.9 mg, 0.200 mmol), phenylacetylene (**6b**, 46  $\mu$ L, 0.420 mmol) and  $n$ BuLi (1.6 M in  $n$ -hexane, 0.250 mL, 0.400 mmol), and **7b** (57.0 mg, 66%) was obtained as a yellow oil after purification by column chromatography (silica gel, 10:1  $n$ -hexane/AcOEt): IR (KBr)  $\nu$  2973, 1404, 1240, 1156, 755  $\text{cm}^{-1}$ ;  $^1\text{H}$  NMR (400 MHz,  $\text{CDCl}_3$ ):  $\delta$  1.33 (broad doublet,  $J = 6.4$  Hz, 6H,  $\text{CH}(\text{CH}_3)_2$ ), 1.38 (broad doublet,  $J = 6.4$  Hz, 6H,  $\text{CH}(\text{CH}_3)_2$ ), 4.03 (broad septet,  $J = 6.4$  Hz, 1H,  $\text{CH}(\text{CH}_3)_2$ ), 5.21 (broad septet,  $J = 6.4$  Hz, 1H,  $\text{CH}(\text{CH}_3)_2$ ), 7.21–7.38 (m, 6H, ArH), 7.61–7.64 (m, 2H, ArH);  $^{13}\text{C}$  NMR (100 MHz,  $\text{CDCl}_3$ ):  $\delta$  19.1 ( $\text{CH}_3$ ), 23.8 ( $\text{CH}_3$ ), 47.8 (CH), 49.9 (CH), 92.4 (C), 92.6 (C), 103.3 (C), 116.9 (CH), 123.3 (C), 128.1 (CH), 128.3 ( $\text{CH} \times 2$ ), 128.7 (CH), 130.7 (C), 131.6 (CH), 151.7 (C); HRMS (EI) calcd for  $\text{C}_{20}\text{H}_{22}\text{IN}_3$   $[\text{M}]^+$  431.0858, found 431.0863.

### 1-{3-[4-(tert-Butyldimethylsilyloxy)-but-1-yn-1-yl]-2-iodophenyl}-3,3-diisopropyltriaz-1-ene (7c)

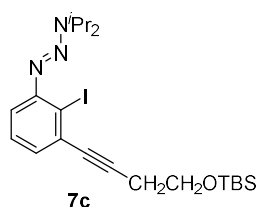

The reaction was performed using **1** (240 mg, 0.500 mmol), 4-(*tert*-Butyldimethylsilyloxy)-1-butyne (**6c**, 230  $\mu$ L, 1.05 mmol) and  $n$ BuLi (1.6 M in  $n$ -hexane, 0.625 mL, 1.00 mmol), and **7c** (121 mg, 47%) was obtained as a pale yellow oil after purification by column chromatography (silica gel, 10:1  $n$ -hexane/AcOEt then silica gel, 4:1  $n$ -hexane/ $\text{CH}_2\text{Cl}_2$ ): IR (KBr)  $\nu$  2939, 1404, 1240, 1103, 837, 778  $\text{cm}^{-1}$ ;  $^1\text{H}$  NMR (500 MHz,  $\text{CDCl}_3$ ):  $\delta$  0.11 (s, 6H,  $\text{Si}(\text{CH}_3)_2$ ), 0.92 (s, 9H, *t*-Bu), 1.33 (broad doublet,  $J = 6.0$  Hz, 6H,  $\text{CH}(\text{CH}_3)_2$ ), 1.39 (broad doublet,  $J = 6.0$  Hz, 6H,  $\text{CH}(\text{CH}_3)_2$ ), 2.71 (t,  $J = 7.5$  Hz, 2H, -

CH<sub>2</sub>CH<sub>2</sub>O-), 3.89 (t, *J* = 7.5 Hz, 2H, -CH<sub>2</sub>CH<sub>2</sub>O-), 4.04 (broad, 1H, CH(CH<sub>3</sub>)<sub>2</sub>), 5.20 (broad, 1H, CH(CH<sub>3</sub>)<sub>2</sub>), 7.15–7.17 (m, 2H, Ar*H*), 7.22 (dd, *J* = 3.0, 6.0 Hz, 1H, Ar*H*); <sup>13</sup>C NMR (125 MHz, CDCl<sub>3</sub>): δ -5.2 (CH<sub>3</sub>), 18.4 (C), 19.1 (CH<sub>3</sub>), 23.8 (CH<sub>3</sub>), 24.1 (CH<sub>2</sub>), 25.9 (CH<sub>3</sub>), 47.7 (CH), 49.8 (CH), 61.9 (CH<sub>2</sub>), 84.6 (C), 90.7 (C), 103.3 (C), 116.4 (CH), 128.0 (CH), 128.8 (CH), 131.2 (C), 151.6 (C); HRMS (EI) calcd for C<sub>22</sub>H<sub>36</sub>IN<sub>3</sub>OSi [M]<sup>+</sup> 513.1672, found 513.1673.

### 3,17-*O*-Bis(*tert*-butyldimethylsilyl)-17α- $\{2$ -iodo-3-(3,3-diisopropyltriaz-1-en-1-yl)phenyl}ethynylestradiol (**7d**)

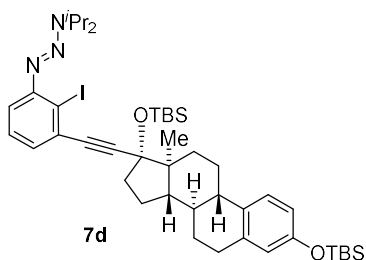

The reaction was performed using **1** (95.9 mg, 0.200 mmol), 3,17-*O*-bis(*tert*-butyldimethylsilyl)-17α-ethynylestradiol<sup>[1]</sup> (**6d**, 220 mg, 0.420 mmol) and <sup>*n*</sup>BuLi (1.6 M in *n*-hexane, 0.250 mL, 0.400 mmol), and **7d** (100 mg, 58%) was obtained as a colorless solid after purification by column chromatography (silica gel, 10:1 *n*-hexane/AcOEt): mp 89–

91 °C; [α]<sub>D</sub><sup>24</sup> = -51.9 (c 0.585, CHCl<sub>3</sub>); IR (KBr) ν 2929, 1496, 1406, 1241, 778 cm<sup>-1</sup>; <sup>1</sup>H NMR (400 MHz, CDCl<sub>3</sub>): δ 0.18 (s, 6H, Si(CH<sub>3</sub>)<sub>2</sub>), 0.25 (s, 6H, Si(CH<sub>3</sub>)<sub>2</sub>), 0.90 (s, 3H, CH<sub>3</sub>), 0.92 (s, 9H, *t*-Bu), 0.97 (s, 9H, *t*-Bu), 1.26–1.53 (m, 16H, CH(CH<sub>3</sub>)<sub>2</sub>×2 and 4H), 1.71–1.74 (m, 1H), 1.83–1.89 (m, 2H), 2.03 (dt, *J* = 4.0, 14.2 Hz, 1H), 2.11–2.22 (m, 2H), 2.27–2.36 (m, 2H), 2.42–2.49 (m, 1H), 2.74–2.83 (m, 2H, C6-*H*), 4.02 (broad septet, *J* = 6.4 Hz, 1H, CH(CH<sub>3</sub>)<sub>2</sub>), 5.14 (broad septet, *J* = 6.4 Hz, 1H, CH(CH<sub>3</sub>)<sub>2</sub>), 6.54 (d, *J* = 2.4 Hz, 1H, Ar*H*), 6.60 (dd, *J* = 2.4, 8.4 Hz, 1H, Ar*H*), 7.12–7.25 (m, 4H, Ar*H*); <sup>13</sup>C NMR (100 MHz, CDCl<sub>3</sub>): δ -4.3 (CH<sub>3</sub>), -2.8 (CH<sub>3</sub>), 13.4 (CH<sub>3</sub>), 18.2 (C), 18.3 (C), 19.1 (CH<sub>3</sub>), 23.3 (CH<sub>2</sub>), 23.7 (CH<sub>3</sub>), 25.8 (CH<sub>3</sub>), 26.0 (CH<sub>3</sub>), 26.6 (CH<sub>2</sub>), 27.5 (CH<sub>2</sub>), 29.8 (CH<sub>2</sub>), 33.1 (CH<sub>2</sub>), 39.8 (CH), 40.5 (CH<sub>2</sub>), 43.7 (CH), 48.2 (CH), 49.0 (C), 50.3 (CH×2), 81.5 (C), 89.3 (C), 97.2 (C), 103.0 (C), 116.7 (CH), 117.1 (CH), 119.9 (CH), 126.2 (CH), 128.1 (CH), 128.6 (CH), 131.2 (C), 133.6 (C), 137.9 (C), 151.9 (C), 153.3 (C); HRMS (ESI) calcd for C<sub>44</sub>H<sub>69</sub>IN<sub>3</sub>O<sub>2</sub>Si<sub>2</sub> [M+H]<sup>+</sup> 854.3973, found 854.3978.

### 1-[2-Iodo-3-(6-phenylhexa-1,3-diyne-1-yl)phenyl]-3,3-diisopropyltriaz-1-ene (**7e**)

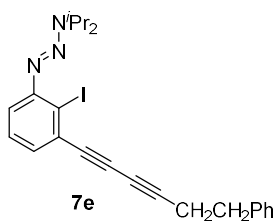

The reaction was performed using **1** (280 mg, 0.584 mmol), 6-phenylhexa-1,3-diyne<sup>[2]</sup> (**6e**, 189 mg, 1.23 mmol) and <sup>*n*</sup>BuLi (1.6 M in *n*-hexane, 0.73 mL, 1.17 mmol), and **7e** (207 mg, 73%) was obtained as a pale yellow oil after purification by column chromatography (silica gel, 4:1 *n*-hexane/CH<sub>2</sub>Cl<sub>2</sub>): IR (KBr) ν 2973, 1404, 1240, 1156, 789 cm<sup>-1</sup>; <sup>1</sup>H NMR (500 MHz, CDCl<sub>3</sub>): δ 1.33 (d, *J* = 6.5 Hz, 6H, CH(CH<sub>3</sub>)<sub>2</sub>), 1.39 (d, *J* = 6.5 Hz,

6H, CH(CH<sub>3</sub>)<sub>2</sub>), 2.68 (t, *J* = 7.0 Hz, 2H, CH<sub>2</sub>CH<sub>2</sub>), 2.92 (t, *J* = 7.0 Hz, 2H, CH<sub>2</sub>CH<sub>2</sub>), 4.04 (broad septet, *J* = 6.5 Hz, 1H, CH(CH<sub>3</sub>)<sub>2</sub>), 5.19 (broad septet, *J* = 6.5 Hz, 1H, CH(CH<sub>3</sub>)<sub>2</sub>), 7.17–7.33 (m, 8H, ArH); <sup>13</sup>C NMR (100 MHz, CDCl<sub>3</sub>): δ 19.1 (CH<sub>3</sub>), 22.0 (CH<sub>2</sub>), 23.8 (CH<sub>3</sub>), 34.6 (CH<sub>2</sub>), 47.9 (CH), 50.0 (CH), 66.0 (C), 77.2 (C), 77.5 (C), 85.0 (C), 103.2 (C), 117.5 (CH), 126.5 (CH), 128.2 (CH), 128.4 (CH), 128.5 (CH), 129.7 (C), 130.1 (CH), 140.1 (C), 151.7 (C); HRMS (ESI) calcd for C<sub>24</sub>H<sub>27</sub>IN<sub>3</sub> [M+H]<sup>+</sup> 484.1250, found 484.1251.

## 5. General Procedure for Synthesis of *o*-Triazenylarylboronic acids **2**

To a solution of **7** (1.00 equiv) in THF (0.20 M) was added <sup>n</sup>BuLi (1.6 M in *n*-hexane, 2.0 equiv) at –78 °C. After stirring at the same temperature for 30 min, a solution of B(OMe)<sub>3</sub> (2.00 equiv) in THF (1.0 M) was added, and the mixture was allowed to warm to room temperature. After stirring overnight, the reaction was quenched with water, and the whole mixture was extracted with AcOEt. The combined organic layers were successively washed with saturated aqueous NH<sub>4</sub>Cl and dried over anhydrous Na<sub>2</sub>SO<sub>4</sub>. Filtration and evaporation in vacuo furnished the crude mixture, which was purified by column chromatography or reprecipitation to give **2**.

### [(3,3-Diisopropyltriaz-1-en-1-yl)-6-ethynylphenyl]boronic acid (**2a'**)

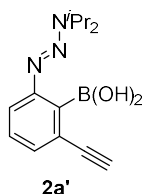

The reaction was performed using **7a** (230 mg, 0.540 mmol), <sup>n</sup>BuLi (1.6 M in *n*-hexane, 0.675 mL, 1.08 mmol) and B(OMe)<sub>3</sub> (112 mg, 1.08 mmol). Obtained crude mixture contained **2a** and **2a'**. Therefore, the crude mixture was treated with TBAF (1.0 M in THF, 0.650 mL, 0.650 mmol) in THF (5 mL) at room temperature. After stirring for 1 hour, the reaction was quenched with water, and the whole mixture was extracted with AcOEt. The combined organic layers were successively washed with brine and dried over anhydrous Na<sub>2</sub>SO<sub>4</sub>. Filtration and evaporation in vacuo furnished the crude mixture, which was purified by column chromatography (silica gel, 10:1 CH<sub>2</sub>Cl<sub>2</sub>/THF (contains no BHT as a stabilizer)) to give **2a'** (68.1 mg, 46%) as a pale brown solid; mp 121–124 °C; IR (KBr) ν 3296, 2979, 1417, 1240 cm<sup>-1</sup>; <sup>1</sup>H NMR (400 MHz, CDCl<sub>3</sub>): δ 1.31 (d, *J* = 6.4 Hz, 6H, CH(CH<sub>3</sub>)<sub>2</sub>), 1.43 (d, *J* = 6.4 Hz, 6H, CH(CH<sub>3</sub>)<sub>2</sub>), 3.52 (s, 1H, –C≡CH), 4.10 (septet, *J* = 6.4 Hz, 1H, CH(CH<sub>3</sub>)<sub>2</sub>), 4.99 (septet, *J* = 6.4 Hz, 1H, CH(CH<sub>3</sub>)<sub>2</sub>), 7.33–7.40 (m, 2H, ArH), 7.65 (dd, *J* = 1.2, 7.6 Hz, 1H, ArH), 8.50 (s, 2H, B(OH)<sub>2</sub>); <sup>13</sup>C NMR (100 MHz, CDCl<sub>3</sub>): δ 19.1 (CH<sub>3</sub>), 24.0 (CH<sub>3</sub>), 48.1 (CH), 49.8 (CH), 81.7 (C), 85.2 (CH), 117.3 (CH), 126.4 (C), 130.6 (CH), 131.2 (CH), 156.6 (C) (C–B was not detected.); HRMS (ESI) calcd for C<sub>16</sub>H<sub>24</sub>BN<sub>3</sub>O<sub>2</sub>Na [M+Na]<sup>+</sup> 324.1859, found 324.1862 [Molecular ion peak was detected as

dimethyl boronate (Ar-B(OMe)<sub>2</sub>), because MeOH was used as a solvent for ionization.].

### [2-(3,3-Diisopropyltriaz-1-en-1-yl)-6-(phenylethynyl)phenyl]boronic acid (**2b**)

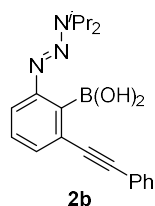

The reaction was performed using **7b** (266 mg, 0.610 mmol), <sup>n</sup>BuLi (1.6 M in *n*-hexane, 0.763 mL, 1.22 mmol) and B(OMe)<sub>3</sub> (127 mg, 1.08 mmol), and **2b** (101 mg, 47%) was obtained as a pale brown oil after purification by column chromatography (neutral alumina, 10:1 *n*-hexane/AcOEt): IR (KBr)  $\nu$  3549, 2924, 1559, 1417, 1240, 1099 cm<sup>-1</sup>; <sup>1</sup>H NMR (400 MHz, CDCl<sub>3</sub>):  $\delta$  1.32 (d, *J* = 6.8 Hz, 6H, CH(CH<sub>3</sub>)<sub>2</sub>), 1.37 (d, *J* = 6.8 Hz, 6H, CH(CH<sub>3</sub>)<sub>2</sub>), 4.10 (septet, *J* = 6.8 Hz, 1H, CH(CH<sub>3</sub>)<sub>2</sub>), 5.00 (septet, *J* = 6.8 Hz, 1H, CH(CH<sub>3</sub>)<sub>2</sub>), 7.36–7.40 (m, 4H, ArH), 7.43 (dd, *J* = 1.2, 7.2 Hz, 1H, ArH), 7.57–7.59 (m, 2H, ArH), 7.64 (dd, *J* = 1.6, 8.4 Hz, 1H, ArH), 8.55 (s, 2H, B(OH)<sub>2</sub>); <sup>13</sup>C NMR (100 MHz, CDCl<sub>3</sub>):  $\delta$  19.1 (CH<sub>3</sub>), 24.0 (CH<sub>3</sub>), 48.0 (CH), 49.7 (CH), 90.1 (C), 93.9 (C), 116.8 (CH), 121.9 (C), 127.7 (C), 128.5 (CH), 129.0 (CH), 130.6 (CH $\times$ 2), 131.6 (CH), 156.6 (C) (C–B was not detected.); HRMS (ESI) calcd for C<sub>22</sub>H<sub>29</sub>BN<sub>3</sub>O<sub>2</sub> [M+H]<sup>+</sup> 378.2353, found 378.2357 [Molecular ion peak was detected as dimethyl boronate (Ar-B(OMe)<sub>2</sub>), because MeOH was used as a solvent for ionization.].

### 3,17-*O*-Bis(*tert*-butyldimethylsilyl)-17 $\alpha$ -[2-borono-3-(3,3-diisopropyltriaz-1-en-1-yl)phenyl]ethynyl]estradiol (**2d**)

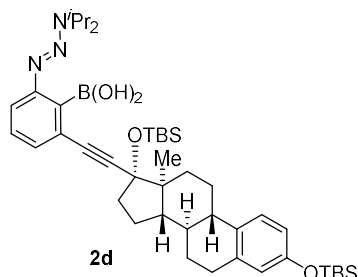

The reaction was performed using **7d** (371 mg, 0.440 mmol), <sup>n</sup>BuLi (1.6 M in *n*-hexane, 0.540 mL, 0.880 mmol) and B(OMe)<sub>3</sub> (91.4 mg, 0.880 mmol), and **2d** (233 mg, 69%) was obtained as a colorless solid after purification by column chromatography (neutral alumina, 10:1 *n*-hexane/AcOEt): mp 104–106 °C; [ $\alpha$ ]<sub>D</sub><sup>24</sup> = -77.7 (c 0.500, CHCl<sub>3</sub>); IR (KBr)  $\nu$  2929, 1418, 1252, 1090, 838 cm<sup>-1</sup>; <sup>1</sup>H NMR (400 MHz, CDCl<sub>3</sub>):  $\delta$  0.18 (s, 6H, Si(CH<sub>3</sub>)<sub>2</sub>), 0.19 (s, 3H, Si(CH<sub>3</sub>)(CH<sub>3</sub>)), 0.20 (s, 3H, Si(CH<sub>3</sub>)(CH<sub>3</sub>)), 0.90 (s, 9H, *t*-Bu), 0.91 (s, 3H, CH<sub>3</sub>), 0.97 (s, 9H, *t*-Bu), 1.26–1.50 (m, 16H, CH(CH<sub>3</sub>)<sub>2</sub> $\times$ 2 and 4H), 1.68–1.76 (m, 1H), 1.80–1.93 (m, 4H), 2.08 (dt, *J* = 4.0, 15.0 Hz, 1H), 2.21 (dt, *J* = 4.0, 10.8 Hz, 1H), 2.32–2.43 (m, 2H), 2.78–2.82 (m, 2H, C6-*H*), 4.09 (septet, *J* = 6.5 Hz, 1H, CH(CH<sub>3</sub>)<sub>2</sub>), 4.98 (septet, *J* = 6.5 Hz, 1H, CH(CH<sub>3</sub>)<sub>2</sub>), 6.53 (d, *J* = 2.4 Hz, 1H, ArH), 6.59 (dd, *J* = 2.4, 8.4 Hz, 1H, ArH), 7.11 (d, *J* = 8.8 Hz, 1H, ArH), 7.33–7.37 (m, 2H, ArH), 7.59–7.62 (m, 1H, ArH), 8.46 (s, 2H, B(OH)<sub>2</sub>); <sup>13</sup>C NMR (100 MHz, CDCl<sub>3</sub>):  $\delta$  -4.4 (CH<sub>3</sub> $\times$ 2), -3.0 (CH<sub>3</sub>), -2.9 (CH<sub>3</sub>), 13.4 (CH<sub>3</sub>), 18.1 (C), 18.2 (C), 19.2 (CH<sub>3</sub>), 23.1 (CH<sub>2</sub>), 24.0 (CH<sub>3</sub>), 25.7 (CH<sub>3</sub>), 25.8 (CH<sub>3</sub>), 26.4 (CH<sub>2</sub>), 27.3 (CH<sub>2</sub>), 29.7 (CH<sub>2</sub>), 33.2 (CH<sub>2</sub>), 39.5 (CH), 40.2 (CH<sub>2</sub>), 43.6 (CH), 48.0 (CH), 48.7 (CH), 49.0 (C), 49.7 (CH), 81.4 (C), 87.3 (C), 99.1 (C), 116.7 (CH), 117.1 (CH), 119.9 (CH), 126.2 (CH), 127.8 (C),

130.7 (CH), 130.8 (CH), 133.2 (C), 137.9 (C), 153.2 (C), 156.7 (C) (C–B was not detected.); HRMS (ESI) calcd for C<sub>46</sub>H<sub>75</sub>BN<sub>3</sub>O<sub>4</sub>Si<sub>2</sub> [M+H]<sup>+</sup> 800.5389, found 800.5394 [Molecular ion peak was detected as dimethyl boronate (Ar-B(OMe)<sub>2</sub>), because MeOH was used as a solvent for ionization.].

**[2-(3,3-Diisopropyltriaz-1-en-1-yl)-6-(6-phenylhexa-1,3-diy-1-yl)phenyl]boronic acid (2e)**

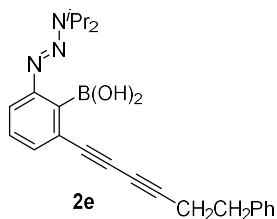

The reaction was performed using **7e** (105 mg, 0.217 mmol), <sup>n</sup>BuLi (1.6 M in *n*-hexane, 0.27 mL, 0.434 mmol) and B(OMe)<sub>3</sub> (45.1 mg, 0.434 mmol), and **2e** (48.1 mg, 55%) was obtained as a beige solid after reprecipitation from Et<sub>2</sub>O–*n*-hexane: mp 106–109 °C; IR (KBr)  $\nu$  2976, 1417, 1379, 1240, 1128, 1033, 805, 747 cm<sup>-1</sup>; <sup>1</sup>H NMR (500 MHz, CDCl<sub>3</sub>):  $\delta$  1.31 (d, *J* = 6.5 Hz, 6H, CH(CH<sub>3</sub>)<sub>2</sub>), 1.42 (d, *J* = 6.5 Hz, 6H, CH(CH<sub>3</sub>)<sub>2</sub>), 2.68 (t, *J* = 7.5 Hz, 2H, CH<sub>2</sub>CH<sub>2</sub>), 2.91 (t, *J* = 7.5 Hz, 2H, CH<sub>2</sub>CH<sub>2</sub>), 4.10 (septet, *J* = 6.5 Hz, 1H, CH(CH<sub>3</sub>)<sub>2</sub>), 4.98 (septet, *J* = 6.5 Hz, 1H, CH(CH<sub>3</sub>)<sub>2</sub>), 7.23–7.26 (m, 3H, ArH), 7.31–7.34 (m, 3H, ArH), 7.38 (dd, *J* = 1.5, 7.5 Hz, 1H, ArH), 7.63 (dd, *J* = 1.5, 8.0 Hz, 1H, ArH), 8.23 (s, 2H, B(OH)<sub>2</sub>); <sup>13</sup>C NMR (125 MHz, CDCl<sub>3</sub>):  $\delta$  19.2 (CH<sub>3</sub>), 21.9 (CH<sub>2</sub>), 24.0 (CH<sub>3</sub>), 34.4 (CH<sub>2</sub>), 48.1 (CH), 49.8 (CH), 65.1 (C), 75.4 (C), 78.8 (C), 86.3 (C), 117.3 (CH), 126.6 (CH), 126.7 (C), 128.4 (CH), 128.6 (CH), 130.7 (CH), 132.0 (CH), 139.9 (C), 156.6 (C) (C–B was not detected.); HRMS (ESI) calcd for C<sub>26</sub>H<sub>32</sub>BN<sub>3</sub>O<sub>2</sub>Na [M+Na]<sup>+</sup> 452.2485, found 452.2483 [Molecular ion peak was detected as dimethyl boronate (Ar-B(OMe)<sub>2</sub>), because MeOH was used as a solvent for ionization.].

**6. General Procedure for Reactions of *o*-Triazenylarylboronic acids **2** with arynophiles **4****

A suspension of *o*-triazenylarylboronic acid **2** (0.100 mmol), pinacol (11.8 mg, 0.100 mmol), Na<sub>2</sub>SO<sub>4</sub> (200 mg) in CH<sub>2</sub>Cl<sub>2</sub> (1.0 mL) was stirred at room temperature. After stirring at the same temperature for 4 h, arynophile (**4**, 0.150 mmol) and silica gel (neutral, spherical, 40–50  $\mu$ m, 200 mg, dried under vacuum at 200 °C) were added to the suspension. After stirring at room temperature for 16 h, silica gel was filtered off, and the eluent was concentrated in vacuo to furnish the crude product, which was purified by column chromatography to give **8**.



### 5-Ethynyl-1,4-dimethyl-1,4-dihydro-1,4-epoxynaphthalene (**8aa**)

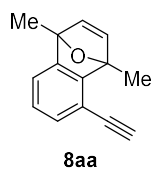

The reaction was performed using **2a'** (27.3 mg, 0.100 mmol) and 2,5-dimethylfuran (16  $\mu$ L, 0.150 mmol), and **8aa** (12.0 mg, 63%) was obtained as a colorless oil after purification by column chromatography (silica gel, 10:1 *n*-hexane/AcOEt): IR (KBr)  $\nu$  3285, 2932, 1382, 1139, 859  $\text{cm}^{-1}$ ;  $^1\text{H}$  NMR (400 MHz,  $\text{CDCl}_3$ ):  $\delta$  1.88 (s, 3H,  $\text{CH}_3$ ), 2.10 (s, 3H,  $\text{CH}_3$ ), 3.18 (s, 1H,  $-\text{C}\equiv\text{CH}$ ), 6.75 (d,  $J = 5.6$  Hz, 1H,  $-\text{HC}=\text{CH}-$ ), 6.83 (d,  $J = 5.6$  Hz, 1H,  $-\text{HC}=\text{CH}-$ ), 6.93 (dd,  $J = 7.2, 8.0$  Hz, 1H, ArH), 7.04 (dd,  $J = 0.8, 8.0$  Hz, 1H, ArH), 7.08 (dd,  $J = 0.8, 7.2$  Hz, 1H, ArH);  $^{13}\text{C}$  NMR (100 MHz,  $\text{CDCl}_3$ ):  $\delta$  15.1 ( $\text{CH}_3$ ), 16.5 ( $\text{CH}_3$ ), 80.3 (C), 80.9 (CH), 87.9 (C), 89.8 (C), 114.1 (C), 118.6 (CH), 124.9 (CH), 129.4 (CH), 146.6 (CH), 146.8 (CH), 153.5 (C), 153.9 (C); HRMS (EI) calcd for  $\text{C}_{14}\text{H}_{12}\text{O}$   $[\text{M}]^+$  196.0888, found 196.0889.

### 1,4-Dimethyl-5-(phenylethynyl)-1,4-dihydro-1,4-epoxynaphthalene (**8ba**)

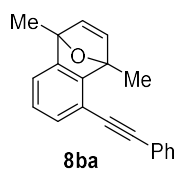

The reaction was performed using **2b** (34.9 mg, 0.100 mmol) and 2,5-dimethylfuran (**4a**, 16  $\mu$ L, 0.150 mmol), and **8ba** (17.2 mg, 63%) was obtained as a colorless oil after purification by column chromatography (silica gel, 10:1 *n*-hexane/AcOEt): IR (KBr)  $\nu$  2979, 1491, 1382, 1139, 859, 756  $\text{cm}^{-1}$ ;  $^1\text{H}$  NMR (400 MHz,  $\text{CDCl}_3$ ):  $\delta$  1.90 (s, 3H,  $\text{CH}_3$ ), 2.19 (s, 3H,  $\text{CH}_3$ ), 6.77 (d,  $J = 5.2$  Hz, 1H,  $-\text{HC}=\text{CH}-$ ), 6.87 (d,  $J = 5.2$  Hz, 1H,  $-\text{HC}=\text{CH}-$ ), 6.96 (t,  $J = 7.4$  Hz, 1H, ArH), 7.07–7.10 (m, 2H, ArH), 7.35–7.37 (m, 3H, ArH), 7.51–7.54 (m, 2H, ArH);  $^{13}\text{C}$  NMR (100 MHz,  $\text{CDCl}_3$ ):  $\delta$  15.1 ( $\text{CH}_3$ ), 16.7 ( $\text{CH}_3$ ), 86.7 (C), 88.1 (C), 89.9 (C), 92.1 (C), 115.2 (C), 118.2 (CH), 123.2 (C), 124.9 (CH), 128.4 ( $\text{CH}\times 2$ ), 128.7 (CH), 131.3 (CH), 146.8 ( $\text{CH}\times 2$ ), 153.2 (C), 153.4 (C); HRMS (EI) calcd for  $\text{C}_{20}\text{H}_{16}\text{O}$   $[\text{M}]^+$  272.1201, found 272.1199.

### 5-(4-(*tert*-Butyldimethylsilyloxy)-but-1-yn-1-yl)-1,4-dimethyl-1,4-dihydro-1,4-epoxynaphthalene (**8ca**)

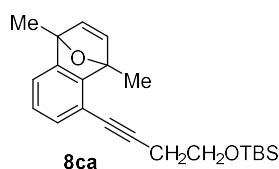

To a solution of **7c** (107 mg, 0.208 mmol) in THF (2.1 mL) was added  $n\text{BuLi}$  (1.6 M in *n*-hexane, 0.261 mL, 0.417 mmol) at  $-78$   $^\circ\text{C}$ . After stirring at the same temperature for 30 min, a solution of  $\text{B}(\text{OMe})_3$  (43.3 mg, 0.417 mmol) in THF (0.42 mL) was added, and the mixture was allowed to warm to room temperature. After stirring overnight, the reaction was quenched with water, and the whole mixture was extracted with AcOEt. The combined organic layers were successively washed with saturated aqueous  $\text{NH}_4\text{Cl}$  and dried over anhydrous  $\text{Na}_2\text{SO}_4$ . Filtration and evaporation in vacuo furnished the crude **2c**. To a solution of crude **2c**

was added pinacol (24.6 mg, 0.208 mmol), Na<sub>2</sub>SO<sub>4</sub> (417 mg) in CH<sub>2</sub>Cl<sub>2</sub> (2.1 mL) at room temperature. After stirring at the same temperature for 4 h, 2,5-dimethylfuran (**4a**, 33 μL, 0.312 mmol) and silica gel (417 mg) were added to the suspension. After stirring at room temperature for 16 h, silica gel was filtered off, and the eluent was concentrated in vacuo to furnish the crude product, which was purified by column chromatography to give **8ca** as a pale orange oil (48.9 mg, 66%): IR (KBr)  $\nu$  2931, 1462, 1382, 1301, 1254, 1106, 837, 777 cm<sup>-1</sup>; <sup>1</sup>H NMR (500 MHz, CDCl<sub>3</sub>):  $\delta$  0.09 (s, 6H, Si(CH<sub>3</sub>)<sub>2</sub>), 0.91 (s, 9H, *t*-Bu), 1.86 (s, 3H, CH<sub>3</sub>), 2.08 (s, 3H, CH<sub>3</sub>), 2.64 (t, *J* = 7.0 Hz, 2H, -CH<sub>2</sub>CH<sub>2</sub>O-), 3.82 (t, *J* = 7.0 Hz, 2H, -CH<sub>2</sub>CH<sub>2</sub>O-), 6.73 (d, *J* = 5.5 Hz, 1H, -HC=CH-), 6.82 (d, *J* = 5.5 Hz, 1H, -HC=CH-), 6.88 (dd, *J* = 6.5, 7.5 Hz, 1H, Ar*H*), 6.95 (dd, *J* = 1.0, 7.5 Hz, 1H, Ar*H*), 7.02 (dd, *J* = 1.0, 6.5 Hz, 1H, Ar*H*); <sup>13</sup>C NMR (100 MHz, CDCl<sub>3</sub>):  $\delta$  -5.3 (CH<sub>3</sub>), 15.1 (CH<sub>3</sub>), 16.6 (CH<sub>3</sub>), 18.3 (C), 23.9 (CH<sub>2</sub>), 25.9 (CH<sub>3</sub>), 61.8 (CH<sub>2</sub>), 78.7 (C), 87.9 (C), 89.8 (C), 90.3 (C), 115.7 (C), 117.6 (CH), 124.8 (CH), 129.0 (CH), 146.7 (CH $\times$ 2), 152.9 (C), 153.2 (C); HRMS (EI) calcd for C<sub>22</sub>H<sub>30</sub>O<sub>2</sub>Si [M]<sup>+</sup> 354.2015, found 354.2013.

### 5-Ethynyl-9-phenyl-1,4-dihydro-1,4-epiminonaphthalene (**8af**)

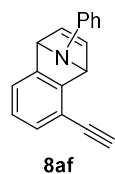

The reaction was performed using **2a'** (27.3 mg, 0.100 mmol) and *N*-phenylpyrrole (**4f**, 21.4 mg, 0.150 mmol), and **8af** (14.4 mg, 59%) was obtained as a colorless oil after purification by column chromatography (silica gel, 10:1 *n*-hexane/AcOEt): IR (KBr)  $\nu$  3283, 1597, 1496, 1306, 773 cm<sup>-1</sup>; <sup>1</sup>H NMR (400 MHz, CDCl<sub>3</sub>):  $\delta$  3.21 (s, 1H, -C $\equiv$ CH), 5.45 (broad, 1H, ArCHN), 5.63 (broad, 1H, ArCHN), 6.82–6.90 (m, 4H, Ar*H*), 6.96–7.02 (m, 3H, Ar*H*), 7.16–7.22 (m, 3H, Ar*H*); <sup>13</sup>C NMR (100 MHz, CDCl<sub>3</sub>):  $\delta$  68.1 (CH), 69.8 (CH), 79.3 (C), 81.0 (CH), 116.0 (C), 117.9 (CH), 121.0 (CH), 121.8 (CH), 125.0 (CH), 128.0 (CH), 128.9 (CH), 141.5 (CH), 142.3 (CH), 146.6 (C), 148.8 (C), 152.1 (C); HRMS (EI) calcd for C<sub>18</sub>H<sub>13</sub>N [M]<sup>+</sup> 243.1048, found 243.1044.

### Ethyl 2-(4-Ethynyl-1,2,3-benzotriazol-1-yl)acetate (**8ag**) and Ethyl 2-(7-Ethynyl-1,2,3-benzotriazol-1-yl)acetate (**8ag'**)

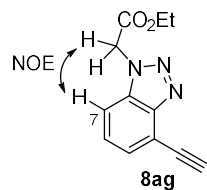

The reaction was performed using **2a'** (27.3 mg, 0.100 mmol) and ethyl azidoacetate (**4g**, 17 μL, 0.150 mmol), and **8ag** (5.6 mg, 24%) and **8ag'** (4.8 mg, 20%) were obtained as a colorless oil after purification by column chromatography (silica gel, 10:1 *n*-hexane/AcOEt).

**8ag**: IR (KBr)  $\nu$  3274, 3072, 1748, 1218, 1014 cm<sup>-1</sup>; <sup>1</sup>H NMR (400 MHz, CDCl<sub>3</sub>):  $\delta$  1.27 (t, *J* = 7.2 Hz, 3H, CO<sub>2</sub>CH<sub>2</sub>CH<sub>3</sub>), 3.57 (s, 1H, -C $\equiv$ CH), 4.25 (q, *J* = 7.2 Hz, 2H,

CO<sub>2</sub>CH<sub>2</sub>CH<sub>3</sub>), 5.44 (s, 2H, NCH<sub>2</sub>CO), 7.48–7.49 (m, 2H, ArH), 7.57 (dd, *J* = 3.6, 4.4 Hz, 1H, ArH); <sup>13</sup>C NMR (100 MHz, CDCl<sub>3</sub>): δ 14.0 (CH<sub>3</sub>), 49.3 (CH<sub>2</sub>), 62.4 (CH<sub>2</sub>), 78.7 (C), 83.6 (CH), 110.2 (CH), 114.5 (C), 127.6 (CH), 128.7 (CH), 133.4 (C), 146.4 (C), 166.1 (C=O); HRMS (EI) calcd for C<sub>12</sub>H<sub>11</sub>N<sub>3</sub>O<sub>2</sub> [M]<sup>+</sup> 229.0851, found 229.0852.

The structure of **8ag** was verified by NOE correlation between C7–H and α-methylene protons.

**8ag'**: IR (KBr)  $\nu$  3257, 2984, 1752, 1212, 1024 cm<sup>-1</sup>; <sup>1</sup>H NMR (400 MHz, CDCl<sub>3</sub>): δ 1.25 (t, *J* = 7.2 Hz, 3H, CO<sub>2</sub>CH<sub>2</sub>CH<sub>3</sub>), 3.42 (s, 1H, –C≡CH), 4.26 (q, *J* = 7.2 Hz, 2H, CO<sub>2</sub>CH<sub>2</sub>CH<sub>3</sub>), 5.73 (s, 2H, NCH<sub>2</sub>CO), 7.35 (dd, *J* = 7.2, 8.4 Hz, 1H, ArH), 7.65 (d, *J* = 7.2 Hz, 1H, ArH), 8.10 (d, *J* = 8.4 Hz, 1H, ArH); <sup>13</sup>C NMR (100 MHz, CDCl<sub>3</sub>): δ 14.1 (CH<sub>3</sub>), 50.0 (CH<sub>2</sub>), 62.2 (CH<sub>2</sub>), 78.4 (C), 83.0 (CH), 105.0 (C), 121.6 (CH), 124.1 (CH), 133.0 (CH), 133.0 (C), 146.3 (C), 167.0 (C=O); HRMS (EI) calcd for C<sub>12</sub>H<sub>11</sub>N<sub>3</sub>O<sub>2</sub> [M]<sup>+</sup> 229.0851, found 229.0850.

### 3-Ethynyl-*N*-methyl-*N*-phenylaniline (**8ah**) and 2-Ethynyl-*N*-methyl-*N*-phenylaniline (**8ah'**)

The reaction was performed using **2a'** (27.3 mg, 0.100 mmol) and *N*-methylaniline (**4h**, 16 μL, 0.150 mmol), and a mixture of **8ah** and **8ah'** (9.1 mg, 43%, **8ah**:**8ah'** = 72:28) was obtained as a colorless oil after purification by column chromatography (silica gel, 10:1 *n*-hexane/AcOEt). IR (KBr)  $\nu$  3292, 1589, 1496, 1344, 753 cm<sup>-1</sup>; <sup>1</sup>H NMR (400 MHz, CDCl<sub>3</sub>): δ 3.02 (s, 1H, –C≡CH for **8ah**), 3.12 (s, 1H, –C≡CH for **8ah'**), 3.30 (s, 3H, CH<sub>3</sub> for **8ah**), 3.32 (s, 3H, CH<sub>3</sub> for **8ah'**), 6.71 (d, *J* = 8.8 Hz, 2H, ArH for **8ah'**), 6.77 (t, *J* = 7.4 Hz, 1H, ArH for **8ah'**), 6.93 (dd, *J* = 2.4, 8.4 Hz, 1H, ArH for **8ah**), 7.02–7.34 (m, 8H, ArH for **8ah** and 5H, ArH for **8ah'**), 7.56 (d, *J* = 8.0 Hz, 1H, ArH for **8ah'**); HRMS (EI) calcd for C<sub>15</sub>H<sub>13</sub>N [M]<sup>+</sup> 207.1048, found 207.1049.

An isomer **8ah'** was synthesized by the reaction of *N*-methyl-2-ethynylaniline<sup>[5]</sup> with benzyne.<sup>[6]</sup> It was confirmed that **8ah'** was the minor product by comparing <sup>1</sup>H NMR spectrum of regioisomeric mixture with authentic sample.

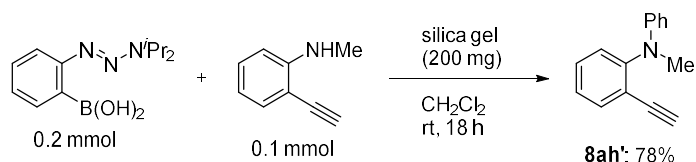

**8ah'**: <sup>1</sup>H NMR (400 MHz, CDCl<sub>3</sub>): δ 3.12 (s, 1H, –C≡CH), 3.32 (s, 3H, CH<sub>3</sub>), 6.71 (d, *J* = 8.8 Hz, 2H, ArH), 6.77 (t, *J* = 7.4 Hz, 1H, ArH), 7.15–7.22 (m, 4H, ArH), 7.34 (dt, *J* = 1.6, 7.6 Hz, 1H, ArH), 7.56 (dd, *J* = 2.0, 8.0 Hz, 1H, ArH).

### 3,17-*O*-Bis(*tert*-butyldimethylsilyl)-17 $\alpha$ -{(9-phenyl-1,4-dihydro-1,4-epiminonaphthalen-5-yl)ethynyl}estradiol (**8df**)

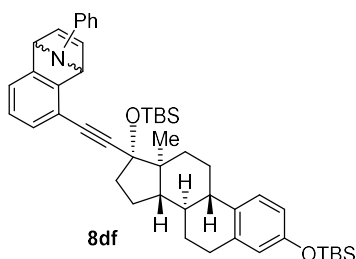

The reaction was performed using **2d** (77.2 mg, 0.100 mmol) and *N*-phenylpyrrole (**4f**, 21.4 mg, 0.150 mmol), and **8df** (31.7 mg, 42%, dr ~1:1) was obtained as a colorless oil after purification by column chromatography (silica gel, 10:1 *n*-hexane/AcOEt): IR (KBr)  $\nu$  2929, 1600, 1496, 1254, 778  $\text{cm}^{-1}$ ;  $^1\text{H}$  NMR (400 MHz,  $\text{CDCl}_3$ ):  $\delta$  0.19 (s, 6H,  $\text{Si}(\text{CH}_3)_2$ ), 0.23–0.25 (s, 6H,  $\text{Si}(\text{CH}_3)_2$ ), 0.92 (s, 9H, *t*-Bu), 0.93 (s, 3H,  $\text{CH}_3$ ), 0.98 (s, 9H, *t*-Bu), 1.27–1.57 (m, 4H), 1.80–1.94 (m, 4H), 2.02–2.11 (m, 2H), 2.25–2.30 (m, 1H), 2.34–2.42 (m, 2H), 2.76–2.85 (m, 2H), 5.43 (broad doublet, 1H, ArCHN), 5.62 (broad doublet, 1H, ArCHN), 6.56 (m, 1H,  $-\text{CH}=\text{CH}-$ ), 6.61–6.64 (m, 1H,  $-\text{CH}=\text{CH}-$ ), 6.78–6.80 (m, 3H, ArH), 6.87 (dt,  $J = 1.2, 8.0$  Hz, 1H, ArH), 6.93–6.98 (m, 3H, ArH), 7.07–7.18 (m, 4H, ArH); HRMS (ESI) calcd for  $\text{C}_{48}\text{H}_{64}\text{NO}_2\text{Si}_2$   $[\text{M}+\text{H}]^+$  742.4476, found 742.4478.

### 1,4-Dimethyl-5-(6-phenylhexa-1,3-diyne-1-yl)-1,4-dihydro-1,4-epoxynaphthalene (**8ea**)

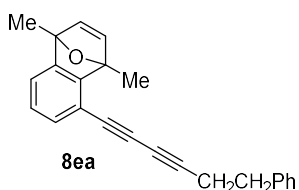

The reaction was performed using **2e** (23.1 mg, 0.0575 mmol) and 2,5-dimethylfuran (**4a**, 9  $\mu\text{L}$ , 0.0863 mmol), and **8ea** (15.9 mg, 85%) was obtained as a colorless oil after purification by column chromatography (silica gel, 10:1 *n*-hexane/AcOEt): IR (KBr)  $\nu$  2931, 1454, 1382, 1301, 1137, 859, 780  $\text{cm}^{-1}$ ;  $^1\text{H}$  NMR (500 MHz,  $\text{CDCl}_3$ ):  $\delta$  1.87 (s, 3H,  $\text{CH}_3$ ), 2.08 (s, 3H,  $\text{CH}_3$ ), 2.67 (t,  $J = 7.5$  Hz, 1H,  $\text{CH}_2\text{CH}_2$ ), 2.90 (t,  $J = 7.5$  Hz, 1H,  $\text{CH}_2\text{CH}_2$ ), 6.74 (d,  $J = 5.5$  Hz, 1H,  $-\text{CH}=\text{CH}-$ ), 6.82 (d,  $J = 5.5$  Hz, 1H,  $-\text{CH}=\text{CH}-$ ), 6.91 (dd,  $J = 7.5, 8.0$  Hz, 1H, ArH), 7.02 (dd,  $J = 0.5, 8.0$  Hz, 1H, ArH), 7.07 (dd,  $J = 0.5, 7.0$  Hz, 1H, ArH), 7.23–7.25 (m, 3H, ArH), 7.30–7.33 (m, 2H, ArH);  $^{13}\text{C}$  NMR (125 MHz,  $\text{CDCl}_3$ ):  $\delta$  15.1 ( $\text{CH}_3$ ), 16.5 ( $\text{CH}_3$ ), 21.8 ( $\text{CH}_2$ ), 34.6 ( $\text{CH}_2$ ), 65.8 (C), 72.2 (C), 77.1 (C), 84.2 (C), 88.0 (C), 89.8 (C), 114.0 (C), 118.6 (CH), 125.0 (CH), 126.5 (CH), 128.4 (CH), 128.5 (CH), 129.5 (CH), 140.0 (C), 146.6 (CH), 146.9 (CH), 153.5 (C), 154.9 (C); HRMS (EI) calcd for  $\text{C}_{24}\text{H}_{20}\text{O}$   $[\text{M}]^+$  324.1514, found 324.1512.

## 7. Synthesis of 1-(2-iodo-3-(5-phenethylthiophen-2-yl)phenyl)-3,3-diisopropyltriaz-1-ene (9) from 7e

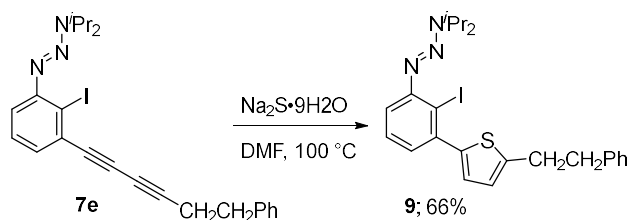

A suspension of **7e** (24.2 mg, 0.0500 mmol), and Na<sub>2</sub>S·9H<sub>2</sub>O (36.0 mg, 0.150 mmol) in DMF (0.5 mL) was stirred at 100 °C. After stirring at the same temperature for 6 hours, the reaction was quenched with water, and the whole mixture was extracted with Et<sub>2</sub>O. The combined organic layers were successively washed with brine and dried over anhydrous Na<sub>2</sub>SO<sub>4</sub>. Filtration and evaporation in vacuo furnished the crude mixture, which was purified by column chromatography (silica gel, 20:1 *n*-hexane/AcOEt) to give **9** (17.0 mg, 66%) as a colorless oil: IR (KBr)  $\nu$  2972, 1403, 1239, 1155, 1010, 793 cm<sup>-1</sup>; <sup>1</sup>H NMR (400 MHz, CDCl<sub>3</sub>):  $\delta$  1.34 (broad doublet,  $J = 7.5$  Hz, 6H, CH(CH<sub>3</sub>)<sub>2</sub>), 1.40 (broad doublet,  $J = 7.5$  Hz, 6H, CH(CH<sub>3</sub>)<sub>2</sub>), 3.04 (dd,  $J = 6.4, 9.2$  Hz, 2H, CH<sub>2</sub>CH<sub>2</sub>), 3.15 (dd,  $J = 6.4, 9.2$  Hz, 2H, CH<sub>2</sub>CH<sub>2</sub>), 4.06 (broad, 1H, CH(CH<sub>3</sub>)<sub>2</sub>), 5.23 (broad, 1H, CH(CH<sub>3</sub>)<sub>2</sub>), 6.76 (d,  $J = 4.0$  Hz, 1H, ArH), 6.96 (d,  $J = 4.0$  Hz, 1H, ArH), 7.14 (dd,  $J = 2.5, 9.0$  Hz, 1H, ArH), 7.19–7.25 (m, 4H, ArH), 7.27–7.32 (m, 3H, ArH); <sup>13</sup>C NMR (100 MHz, CDCl<sub>3</sub>):  $\delta$  19.2 (CH<sub>3</sub>), 23.8 (CH<sub>3</sub>), 32.1 (CH<sub>2</sub>), 37.9 (CH<sub>2</sub>), 47.7 (CH), 49.8 (CH), 102.8 (C), 116.7 (CH), 123.9 (CH), 126.1 (CH), 127.3 (CH), 127.5 (CH), 128.0 (CH), 128.4 (CH), 128.5 (CH), 140.9 (C), 141.2 (C), 143.7 (C), 144.7 (C), 151.8 (C); HRMS (EI) calcd for C<sub>24</sub>H<sub>28</sub>IN<sub>3</sub>S [M]<sup>+</sup> 517.1049, found 517.1050.

## 8. DFT calculation

All calculations were performed with the Gaussian 09 program package.<sup>[7]</sup> The groundstate geometries were optimized at the B3LYP/6-31+G(d,p) basis set without an implicit solvation model.

### 3-(3,3-dimethyltriaz-1-en-1-yl)benzyne

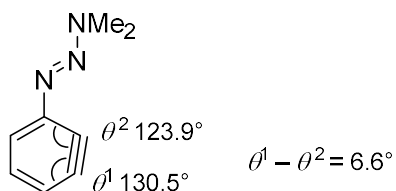

#### Cartesian coordinates

|   |            |            |            |
|---|------------|------------|------------|
| C | 1.8439620  | 1.1579410  | 0.0202280  |
| C | 0.8247740  | 0.1708800  | -0.0078840 |
| C | 1.3690410  | -1.1220820 | -0.0256810 |
| C | 2.5963640  | -1.3608100 | -0.0181940 |
| C | 3.6800810  | -0.4979630 | 0.0081770  |
| C | 3.2121720  | 0.8362300  | 0.0282130  |
| H | 1.5351370  | 2.1992900  | 0.0354740  |
| H | 4.7319210  | -0.7567570 | 0.0127060  |
| H | 3.9401290  | 1.6440250  | 0.0497620  |
| N | -0.5146540 | 0.5674490  | -0.0112660 |
| N | -1.3202500 | -0.4168040 | -0.0328340 |
| N | -2.5999590 | -0.0853040 | -0.0674330 |
| C | -3.5508480 | -1.1759530 | 0.0633440  |
| H | -3.0035970 | -2.1130330 | -0.0411340 |
| H | -4.0466600 | -1.1571230 | 1.0431080  |
| H | -4.3142700 | -1.1114470 | -0.7194740 |
| C | -3.0362330 | 1.3034880  | -0.0057690 |
| H | -2.5675440 | 1.8792610  | -0.8086320 |
| H | -4.1217100 | 1.3257880  | -0.1130080 |
| H | -2.7452450 | 1.7622210  | 0.9473240  |

### 3-ethynylbenzyne

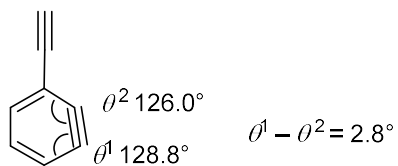

#### Cartesian coordinates

|   |            |            |            |
|---|------------|------------|------------|
| C | -0.6151939 | -0.0893941 | 0.0000910  |
| C | 0.1927479  | -1.2280417 | 0.0002089  |
| C | 1.4428306  | -1.2426417 | -0.0001491 |
| C | 2.3227200  | -0.1750420 | -0.0000496 |
| C | 1.5967697  | 1.0406303  | -0.0000363 |
| C | 0.1938955  | 1.0853860  | 0.0000809  |
| H | 3.4056020  | -0.2128401 | -0.0000962 |
| H | 2.1490965  | 1.9770585  | -0.0001396 |
| H | -0.3076978 | 2.0489258  | 0.0001939  |
| C | -2.0391072 | -0.0422135 | 0.0000138  |
| C | -3.2498929 | 0.0083661  | -0.0001191 |
| H | -4.3156184 | 0.0445590  | -0.0002003 |

## References

- [1] T. Liu, J. X. Qiao, M. A. Poss, J.-Q. Yu, *Angew. Chem. Int. Ed.* **2017**, *56*, 10924.
- [2] S. Ghorai, D. Lee, *Org. Lett.* **2021**, *23*, 697.
- [3] X. Sun, W. Li, G. Hou, L. Zhou, X. Zhang, *Adv. Synth. Catal.* **2009**, *351*, 2553.
- [4] Z. Xu, W. Hu, Q. Liu, L. Zhang, Y. Jia, *J. Org. Chem.* **2010**, *75*, 7626.
- [5] J. Huang, T. Mao, Q. Zhu, *Eur. J. Org. Chem.* **2014**, 2878.
- [6] H.-D. Xu, Y.-P. Pan, X.-T. Ren, P. Zhang, M.-H. Shen, *Tetrahedron Lett.* **2015**, *56*, 6734.
- [7] Gaussian 09, Revision D.01, M. J. Frisch, G. W. Trucks, H. B. Schlegel, G. E. Scuseria, M. A. Robb, J. R. Cheeseman, G. Scalmani, V. Barone, B. Mennucci, G. A. Petersson, H. Nakatsuji, M. Caricato, X. Li, H. P. Hratchian, A. F. Izmaylov, J. Bloino, G. Zheng, J. L. Sonnenberg, M. Hada, M. Ehara, K. Toyota, R. Fukuda, J. Hasegawa, M. Ishida, T. Nakajima, Y. Honda, O. Kitao, H. Nakai, T. Vreven, J. A. Montgomery, Jr., J. E. Peralta, F. Ogliaro, M. Bearpark, J. J. Heyd, E. Brothers, K. N. Kudin, V. N. Staroverov, T. Keith, R. Kobayashi, J. Normand, K. Raghavachari, A. Rendell, J. C. Burant, S. S. Iyengar, J. Tomasi, M. Cossi, N. Rega, J. M. Millam, M. Klene, J. E. Knox, J. B. Cross, V. Bakken, C. Adamo, J. Jaramillo, R. Gomperts, R. E. Stratmann, O. Yazyev, A. J. Austin, R. Cammi, C. Pomelli, J. W. Ochterski, R. L. Martin, K. Morokuma, V. G. Zakrzewski, G. A. Voth, P. Salvador, J. J. Dannenberg, S. Dapprich, A. D. Daniels, O. Farkas, J. B. Foresman, J. V. Ortiz, J. Cioslowski, and D. J. Fox, Gaussian, Inc., Wallingford CT, 2013.



**tert-Butyl [3-((tetrahydro-2H-pyran-2-yl)oxy)phenyl]carbamate (S1)**

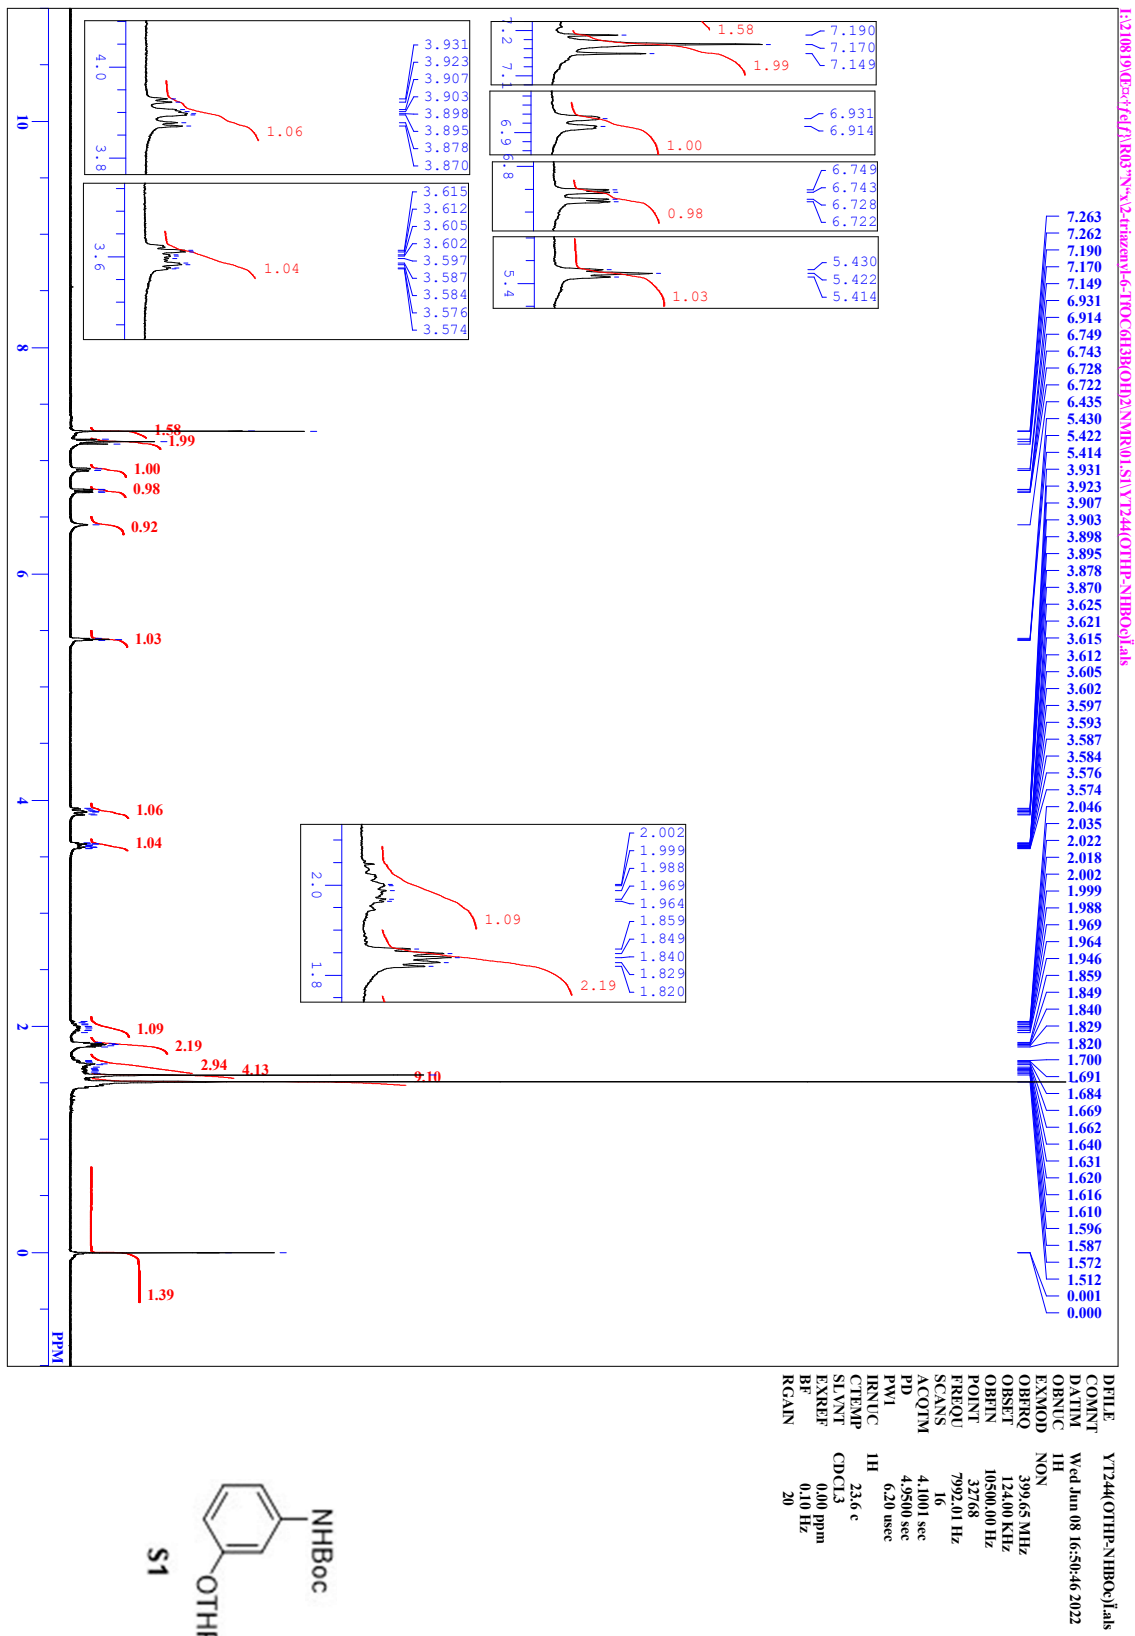

single pulse decoupled gated NOE

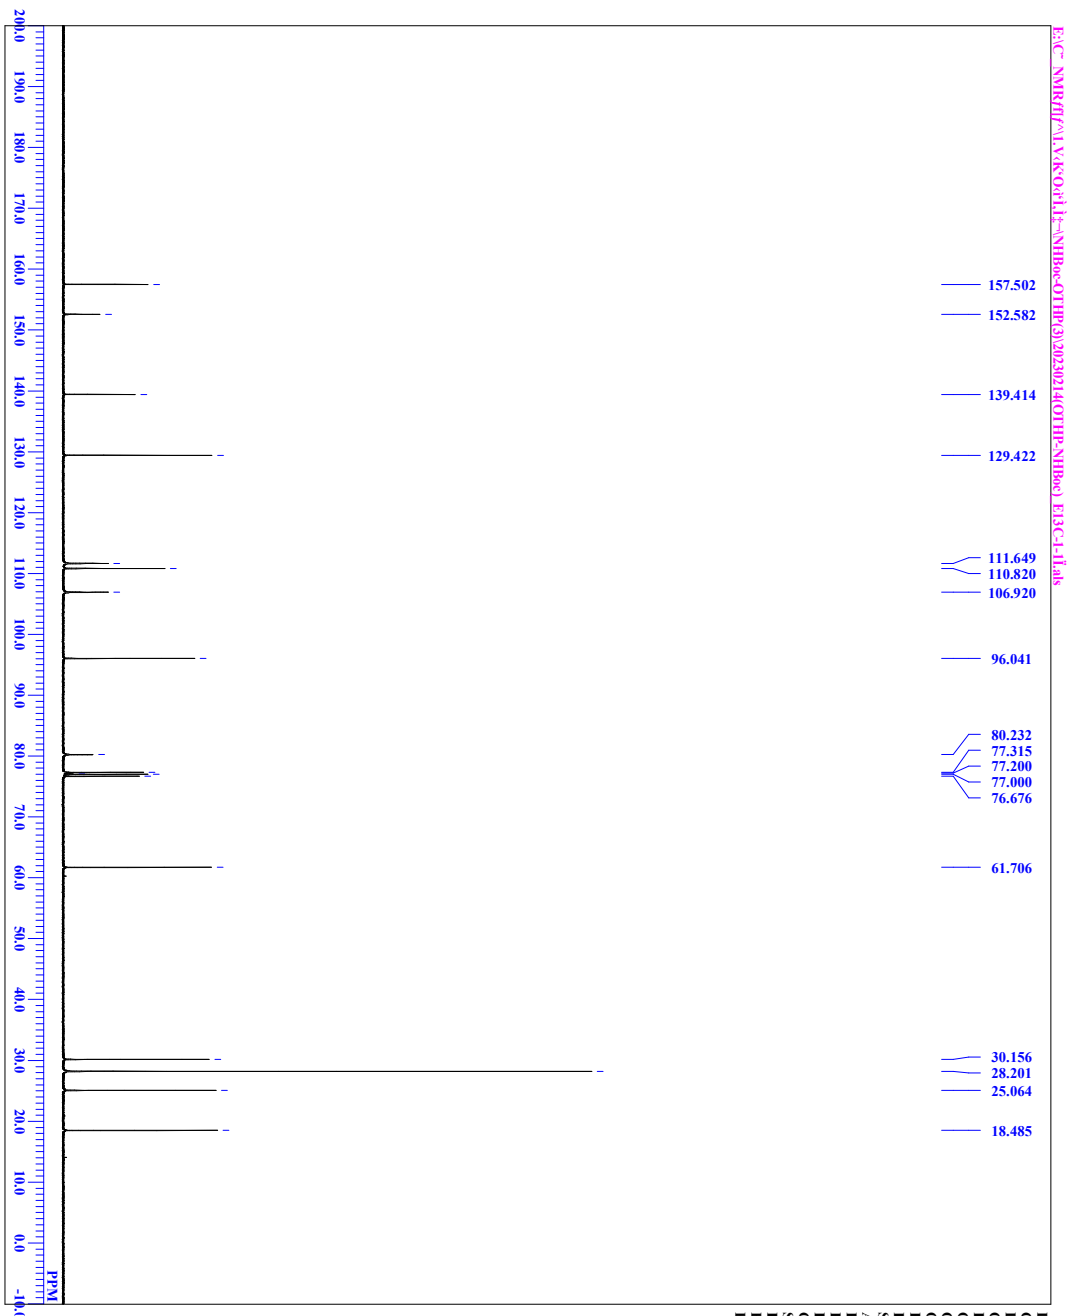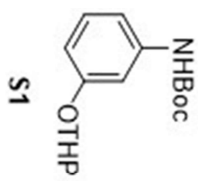

**tert-Butyl [3-((tetrahydro-2H-pyran-2-yl)oxy)-2-(trimethylsilyl)phenyl]carbamate (S2)**

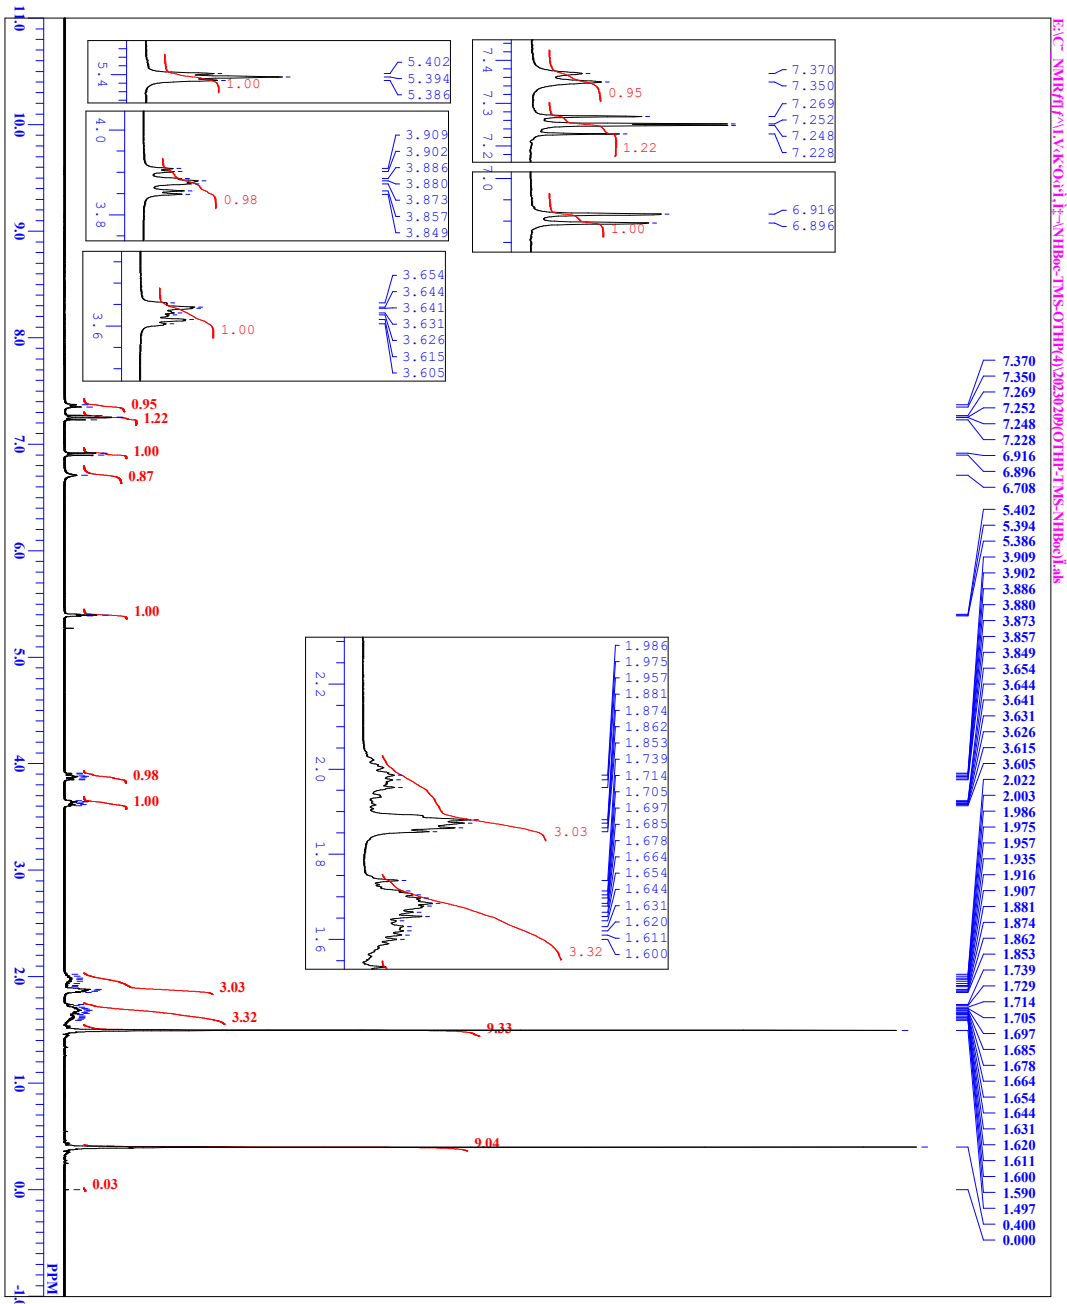

FILE: NMR\202309\OTHP-TMS-NHBoc\1.f2

202309\OTHP-TMS-NHBoc\1.f2  
 Thu Feb 09 19:46:35 2023  
 CONIN: 1H  
 DATTM: 1H  
 OBNIC: 1H  
 EXMID: NON  
 OBRQ: 399.65 MHz  
 OBRF: 124.00 KHz  
 OBRN: 10506.00 Hz  
 POINT: 32768  
 PRLQ: 7992.01 Hz  
 SCANS: 8  
 ACOIM: 4.1001 sec  
 PD: 4.9500 sec  
 PW1: 6.20 usec  
 IRNUC: 1H  
 CTEMP: 23.2e  
 CDCL3: 0.00 ppm  
 SLVNT: 0.10 Hz  
 EXREF: 8  
 RGAIN: 8

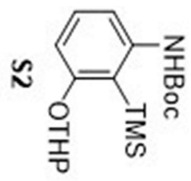

single pulse decoupled gated NOE

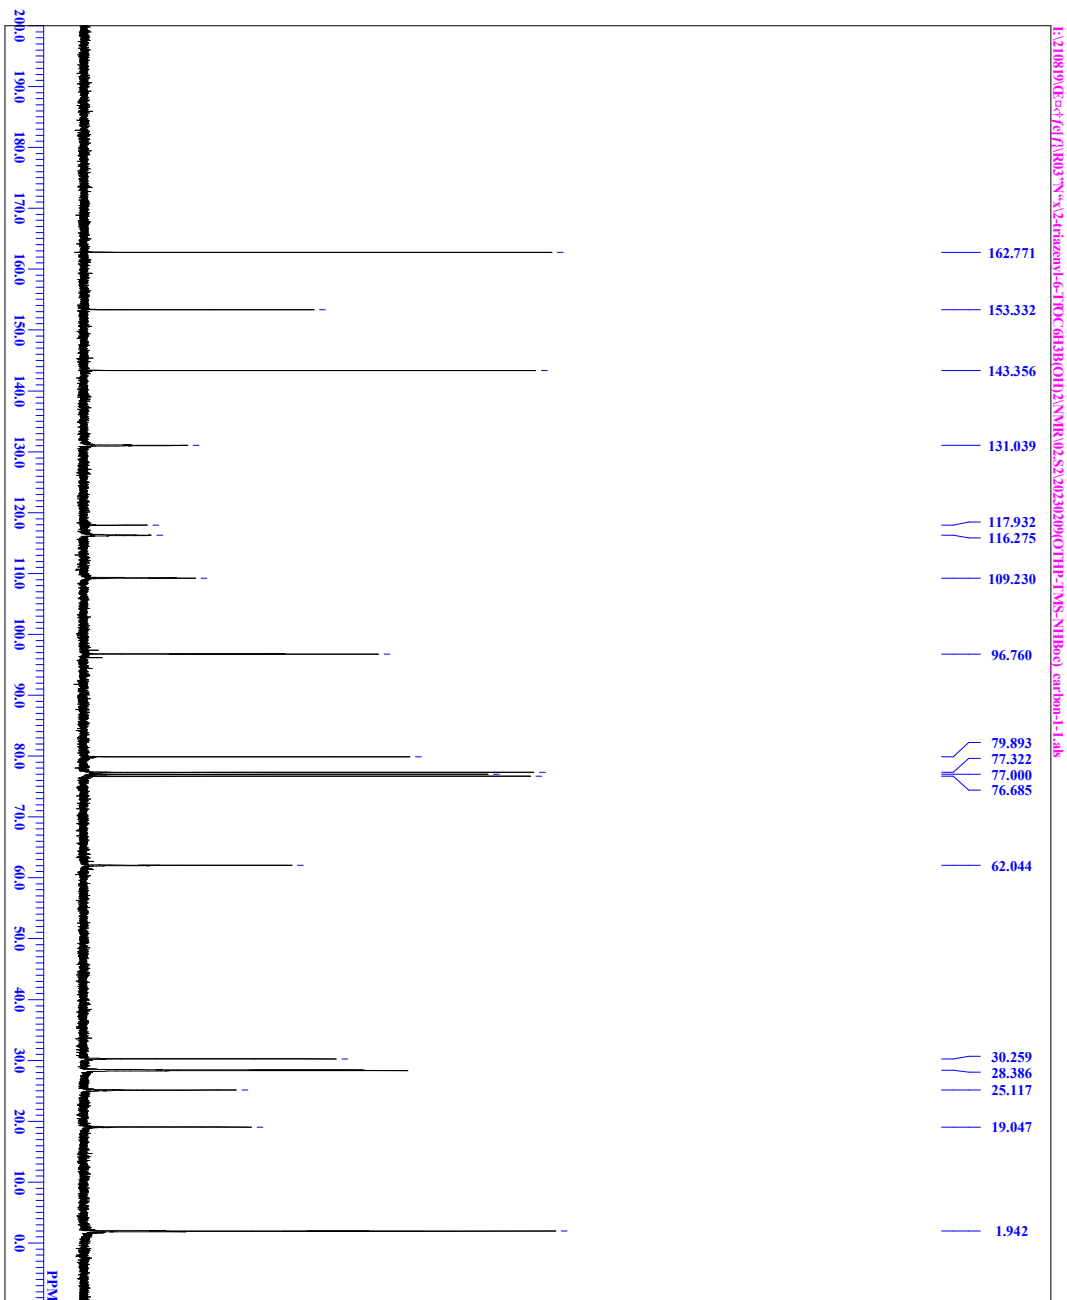

TITLE 20230209(OTHP-TMS-NHBoc).c  
 CONT single pulse decoupled gated NOE  
 DATE 2023-02-10 11:25:18  
 INSTR 13C  
 EXMID carbon\_13p  
 OBSRO 100.63 MHz  
 OBSST 4.82 KHz  
 OBSIN 0.13 Hz  
 POINT 40960  
 FREQOU 31565.66 Hz  
 SCANS 1000  
 ACQTM 1.2976 sec  
 PD 1.7024 sec  
 PVI 3.75 usec  
 IRENIG 50.0° c  
 CTEMP  
 SLVNT CDCL3  
 EXREF 77.00 ppm  
 BP 0.10 Hz  
 RGAIN 56

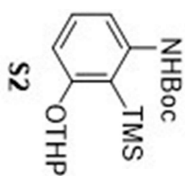

**tert-Butyl (3-hydroxy-2-iodophenyl)carbamate (S3)**

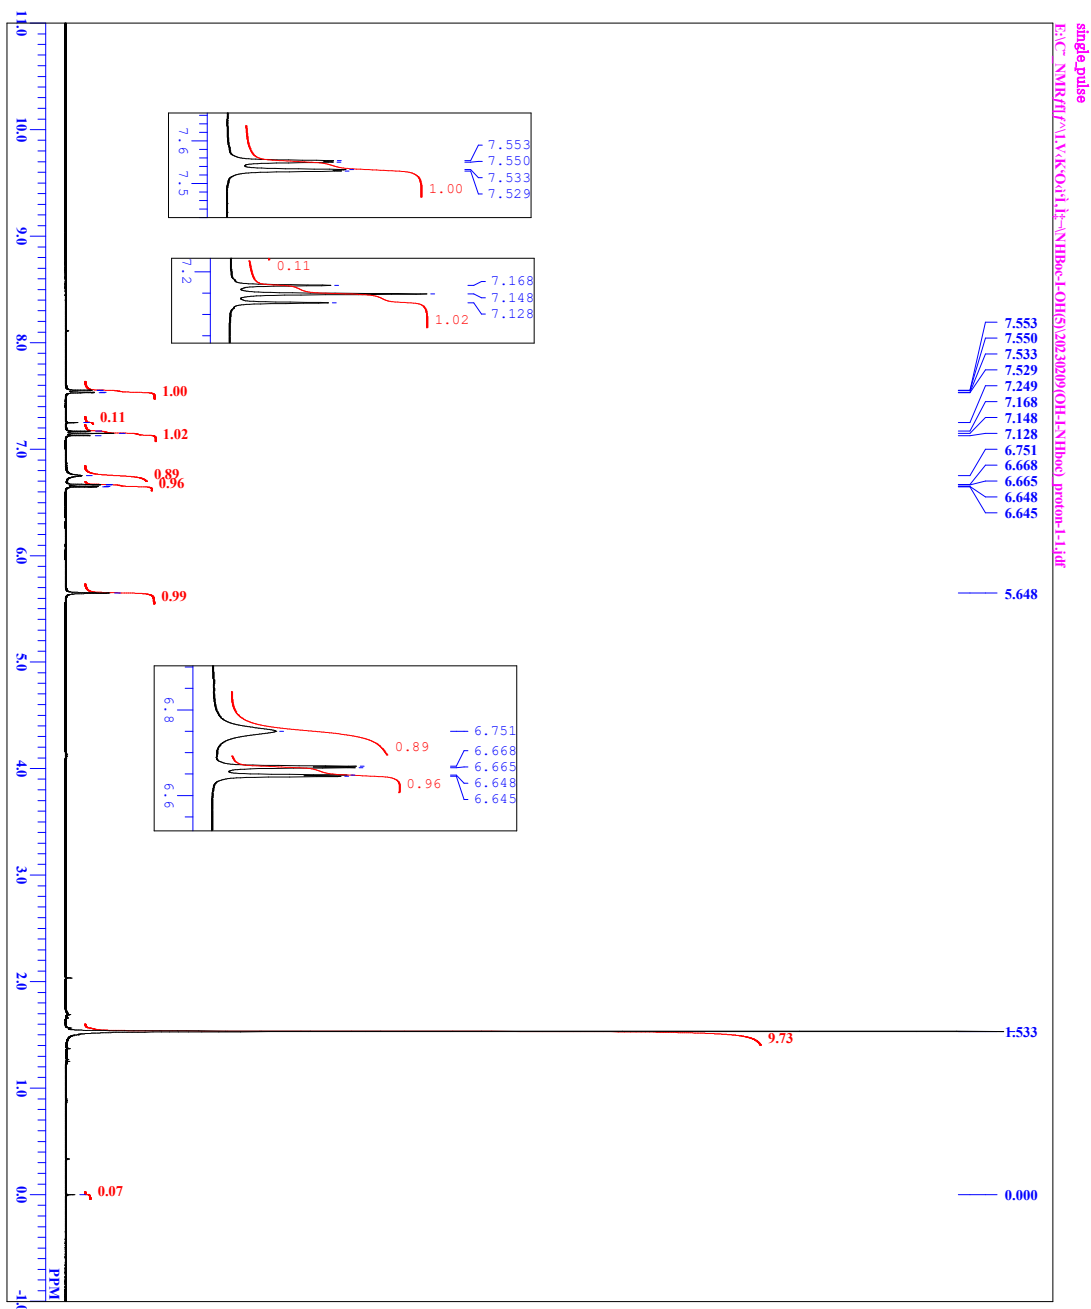

FILE 20230209\OH-1-(NHBoc)\_proton-1  
 CONT single\_pulse  
 DATIM 2023-02-10 13:19:42  
 OBNUC 1H  
 EXMID proton\_1xp  
 OBRFQ 399.38 MHz  
 OBSST 4.41 KHz  
 OBRFN 1.61 Hz  
 POINT 40960  
 FREQU 7494.01 Hz  
 SCANS 64  
 ACOIM 5.4657 sec  
 PD 1.5343 sec  
 PW1 3.30 usec  
 IRNUC 1H  
 CTEMP 50.0 c  
 CDCL3 CDCL3  
 SLVNT 0.00 ppm  
 EXREF 0.10 Hz  
 BF 56  
 RGAIN 56

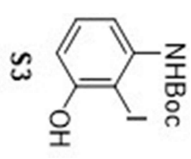

single pulse decoupled gated NOE

EXP: NMR/01.VK00113-NHBoc-I-OH(S)O-I-NHBoc\_E13C14Is

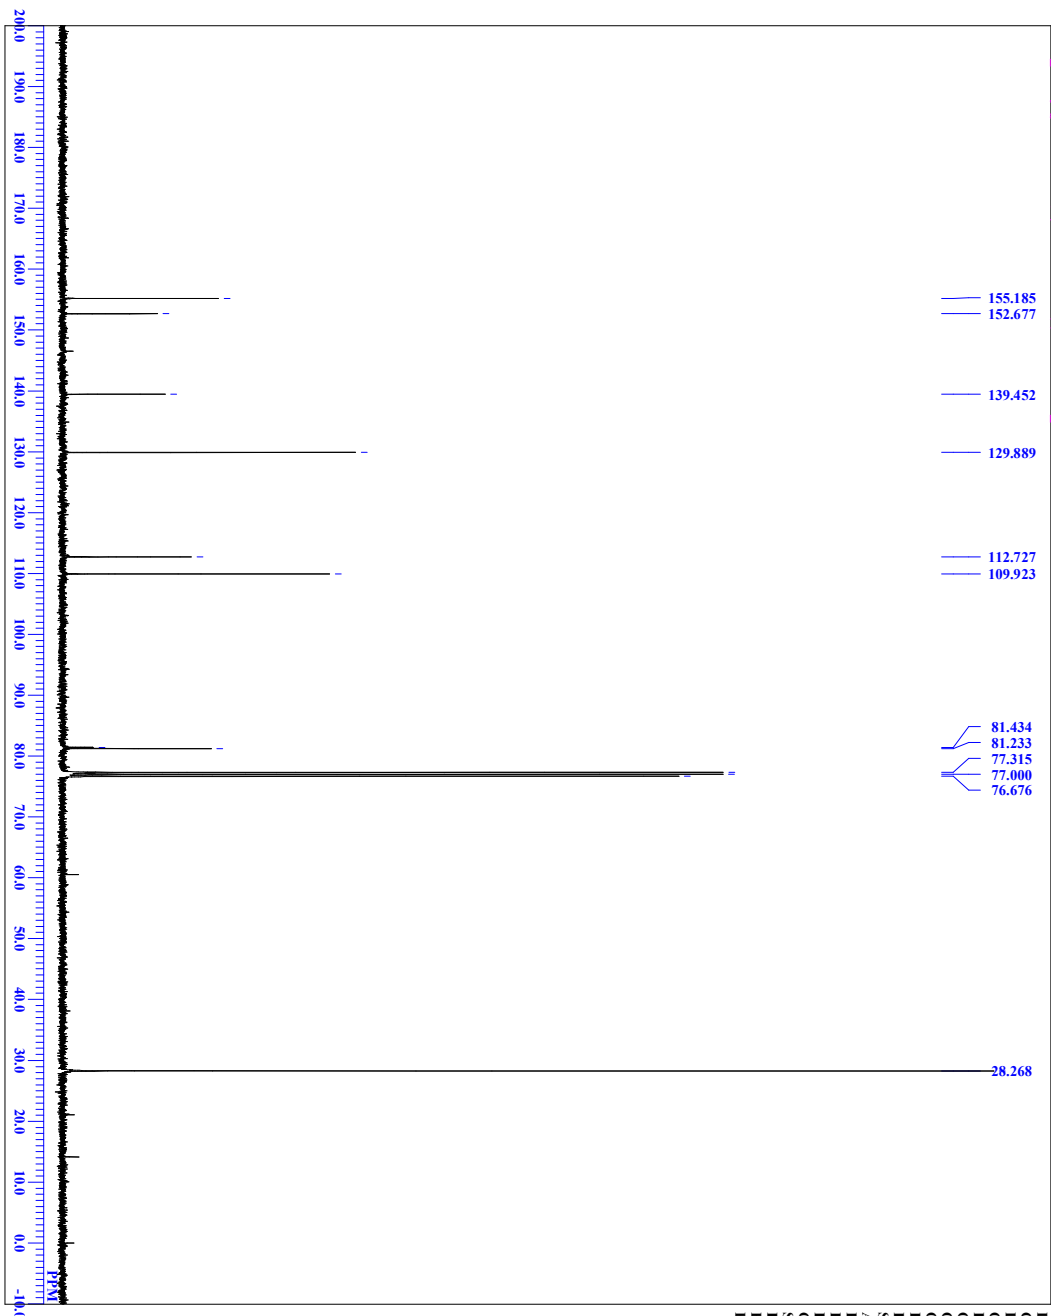

|        |                                  |
|--------|----------------------------------|
| NAME   | OH-I-NHBoc_E13C14Is              |
| COMPT  | single pulse decoupled gated NOE |
| DATE_  | 2022-06-18 12:24:27              |
| INSTR  | 13C                              |
| EXMID  | single_pulse_dec                 |
| ORNUC  | 13C                              |
| EXMOP  | 100.53 MHz                       |
| ORSET  | 5.35 KHz                         |
| ORFIN  | 5.86 Hz                          |
| POINT  | 26214                            |
| FREQOU | 251256.9 Hz                      |
| SCANS  | 800                              |
| ACQTM  | 1.0433 sec                       |
| PD     | 2.0000 sec                       |
| PWI    | 3.60 usec                        |
| IRNTIC | 1H                               |
| CTEMP  | 20.5 c                           |
| SLEVT  | CDCL3                            |
| EXREF  | 77.00 ppm                        |
| BP     | 1.20 Hz                          |
| RGAIN  | 60                               |

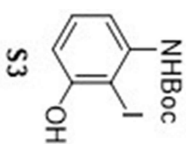

3-{{tert-Butoxycarbonyl}amino}-2-iodophenyl trifluoromethanesulfonate (3)

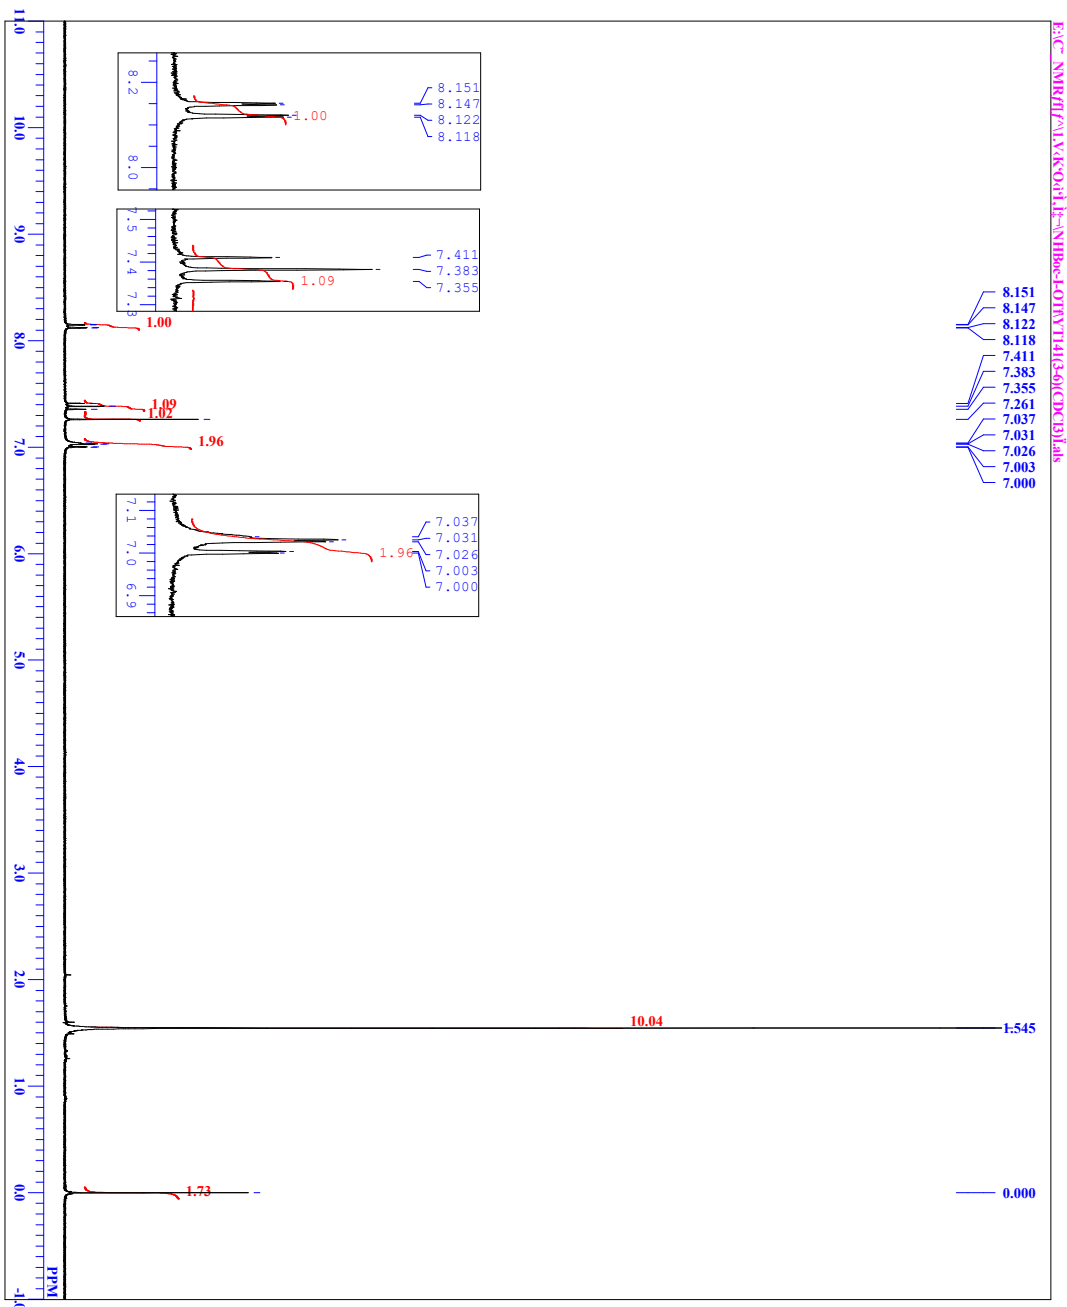

FILE: NMR\2021\12\17\16-3654\3-6\CDCl3\31.h

FILE: Y141(3-6)(CDCl3).ah  
 COMPT: F4 Dec 17 16:46:54 2021  
 DATUM: H1  
 ORNOC: H1  
 EXMCD: NON  
 OBRQ: 300.40 MHz  
 OBSRT: 130.00 KHz  
 OBRFN: 1150.00 Hz  
 POINT: 32768  
 PRQ: 6006.01 Hz  
 SFCANS: 16  
 ACO: 5.4559 sec  
 PD: 1.5440 sec  
 PW: 5.20 usec  
 IRNUC: H1  
 CTMPC: 25.4 e  
 SLENT: CDCl3  
 EXREF: 0.00 ppm  
 BF: 0.01 Hz  
 RGAIN: 22

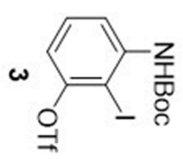

single pulse decoupled gated NOE

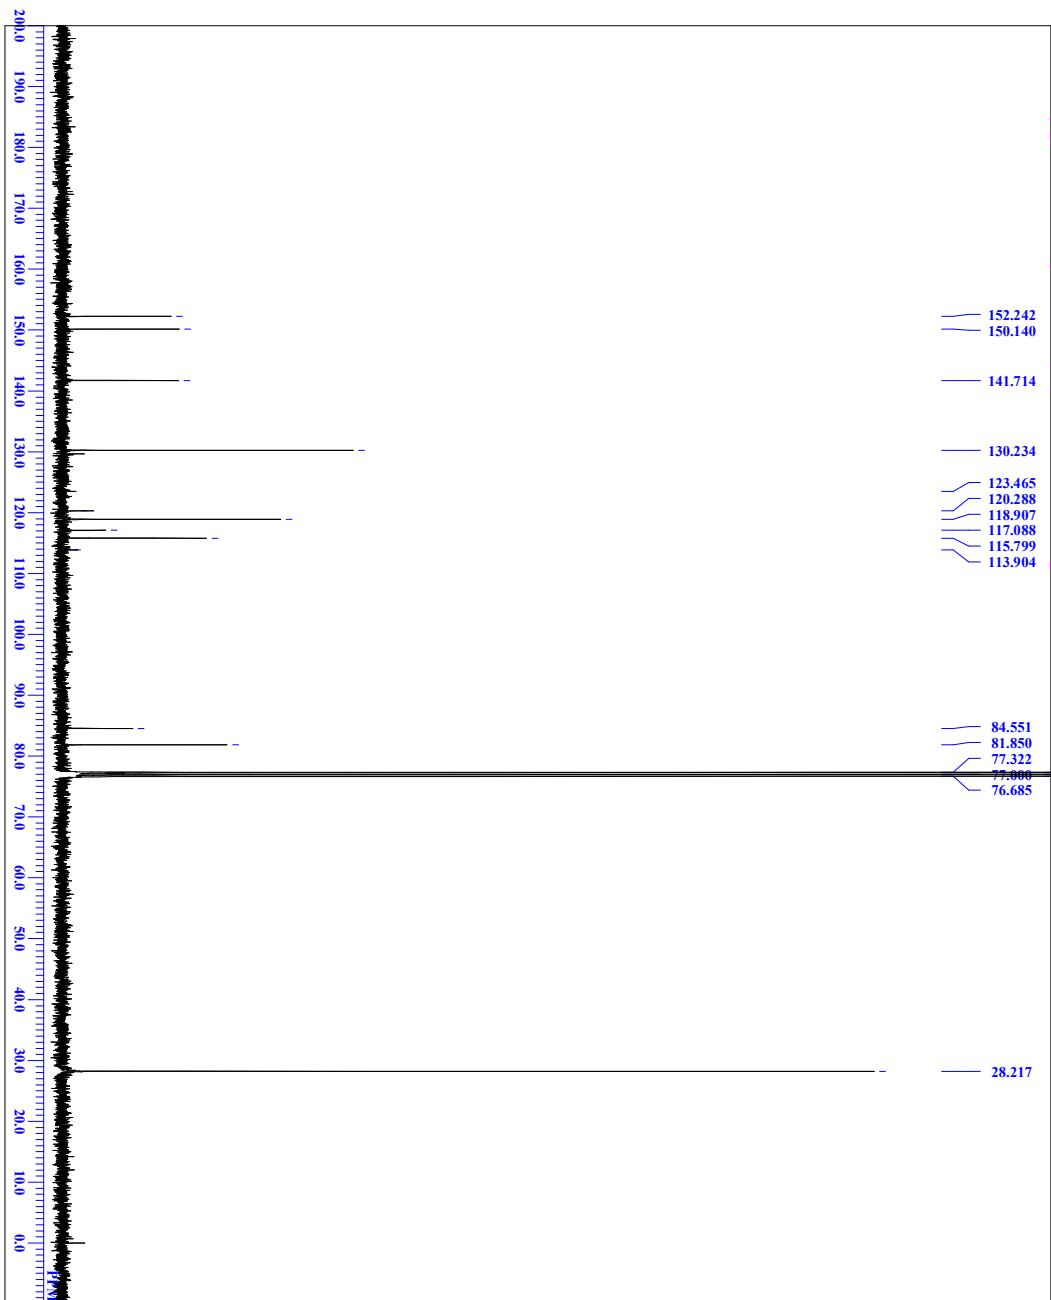

```

NAME      OTF-1-NHBoc_carbon-1-L1.als
COUNT   single pulse decoupled gated NOE
DATE_    2022-06-20 18:16:57
INSTRUM  13C
PULPROG  zgpg30
PROBHD   5mm QNP1H1
P1       12.00
SFO1     100.63 MHz
NUC1     13C
NUC2     13C
F1       100.63 MHz
F2       482.525 MHz
AQ       2.525259 Hz
RG       1000
SOLVENT  CDCl3
EXPT     1.2976 sec
PC       1.7024 sec
PWI     3.75 usec
IRNTG    1H
CTEMP    22.7 c
SOLVENT  CDCl3
SLVNT    77.00 ppm
EXREF    1.20 Hz
RGAIN    56
  
```

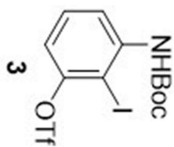



3-(3,3-Diisopropyltriaz-1-en-1-yl)-2-iodophenyl trifluoromethanesulfonate (1)

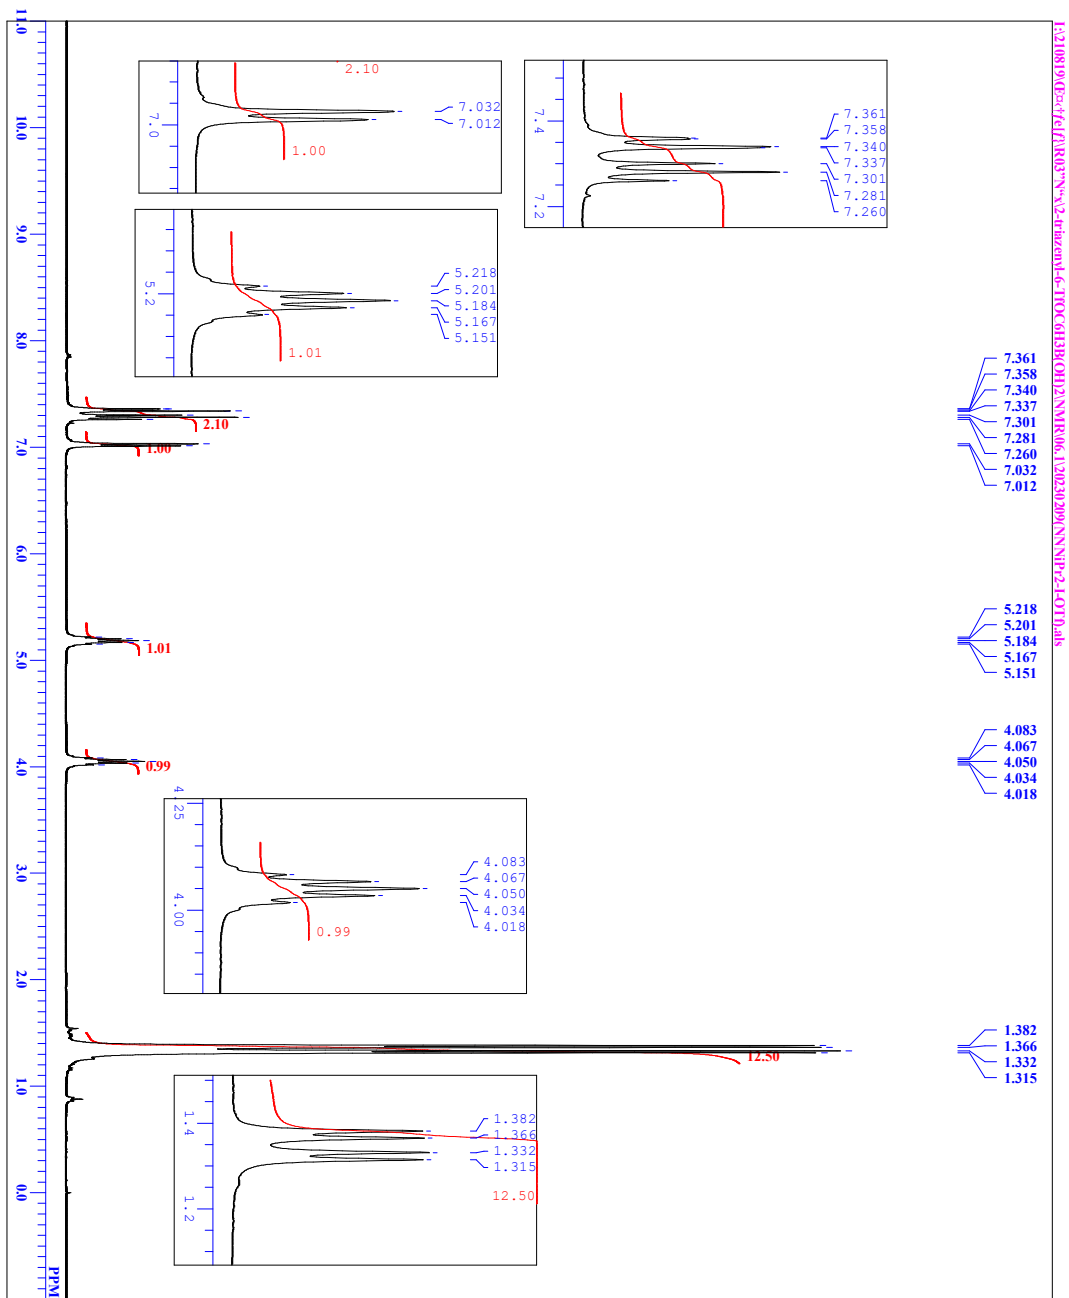

F:\210819\Disc\161\210819\3\NMR\6-1-100\61318\Q112\NMR\06\_1\02\20\20\NN\NP2-1-OTf.d1s

FILE: 20230209\NN\NP2-1-OTf.d1s  
 CONIN: Thu Feb 09 19:55:07 2023  
 DATIM: 1H  
 EXNO: 1  
 EXNO2: NON  
 OBRQ: 399.65 MHz  
 OBRF: 124.00 KHz  
 OBRN: 10506.00 Hz  
 POINT: 32768  
 PREQ: 7992.01 Hz  
 SCANS: 8  
 ACOIM: 4.1001 sec  
 PD: 4.9500 sec  
 PW1: 6.20 usec  
 IRNUC: 1H  
 CTEMP: 23.0 c  
 SLOTT: CDCl3  
 SLVNT: 0.00 ppm  
 EXREF: 120 Hz  
 RGAIN: 6

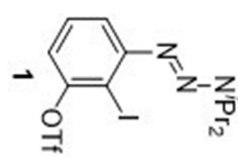

single pulse decoupled gated NOE

File: C:\NMR\7\21\18\04\18-02-10e-3-triazenylphenyltri(18c)20230215\NN-1-OTf\_carbon-1-I\_18s

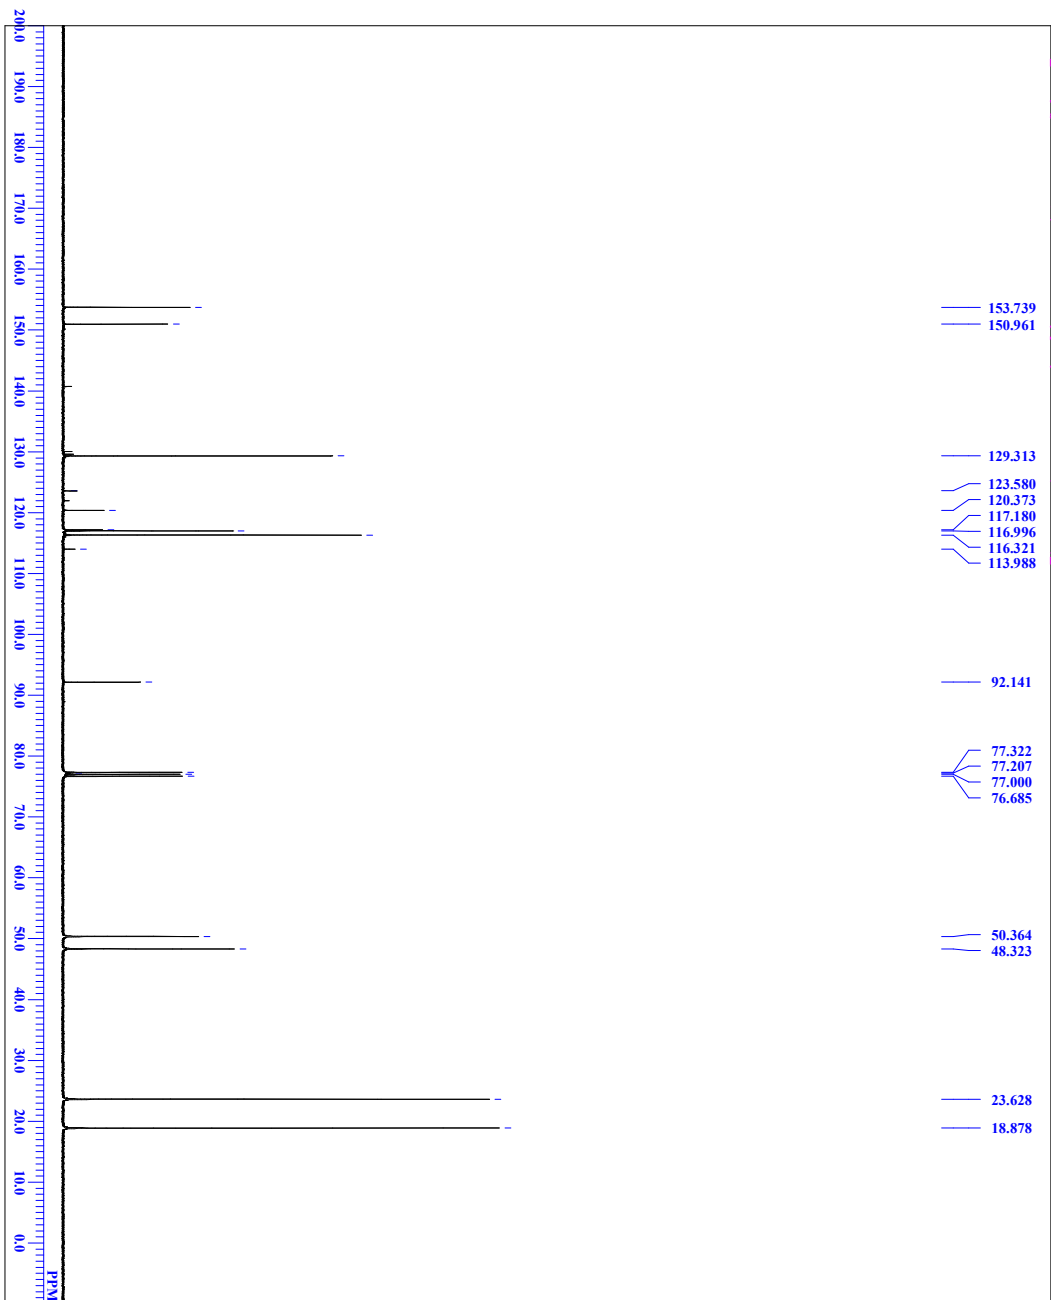

DATE: 20230215\NN-1-OTf\_carbon-1-I  
 COMMENT: single pulse decoupled gated NOE  
 D1: 202.340215 11:14:17  
 P1: 1.30  
 EXMAG: carbon\_jmp  
 OBSFREQ: 100.63 MHz  
 OBSF1: 4.82 KHz  
 OBSF2: 0.13 Hz  
 POINT: 32768  
 FREQ: 25252.59 Hz  
 SCANS: 1500  
 ACQTM: 1.2976 sec  
 PD: 1.7024 sec  
 PVI: 3.77 usec  
 IRENUC: 1H 21.8 e  
 CTEMP: CDCl3  
 SLEVT: 77.00 ppm  
 EXREF: 1.20 Hz  
 BR: 56  
 RCGAIN:

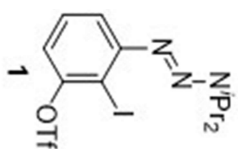

# 1-(1,4-Dimethyl-1,4-dihydro-1,4-epoxynaphthalen-5-yl)-3,3-diisopropyltriazen-1-ene (5a)

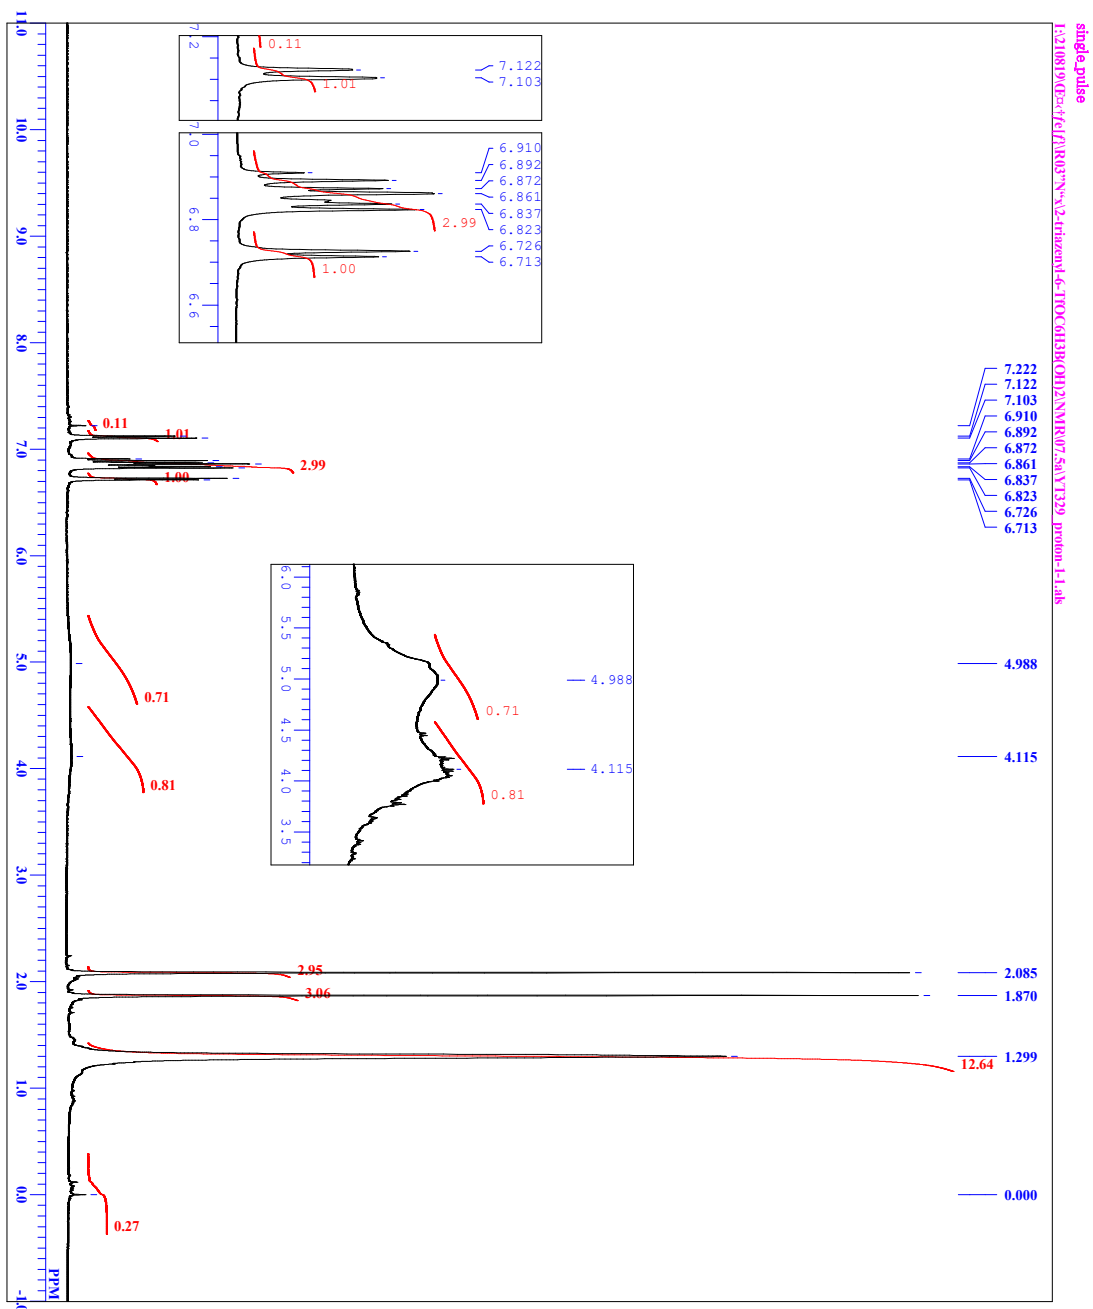

FILE VT329 proton-1.1.als  
 COMINT single\_pulse  
 DATIM 2023-02-02 10:12:01  
 PROCNO 1  
 EXMID proton\_1xp  
 OBRQ 399.38 MHz  
 OBSF 441 KHz  
 OBRN 1.61 Hz  
 POINT 40960  
 FREQ 7494.01 Hz  
 SCANS 16  
 ACOIM 5.4657 sec  
 PD 1.5343 sec  
 PUL 3.30 usec  
 INVC 50.0 e  
 CTEMP CDCL3  
 SVENT 0.00 ppm  
 EXREF 120 Hz  
 BF 36  
 RGAIN

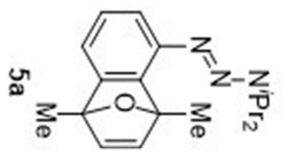

single pulse decoupled gated NOE

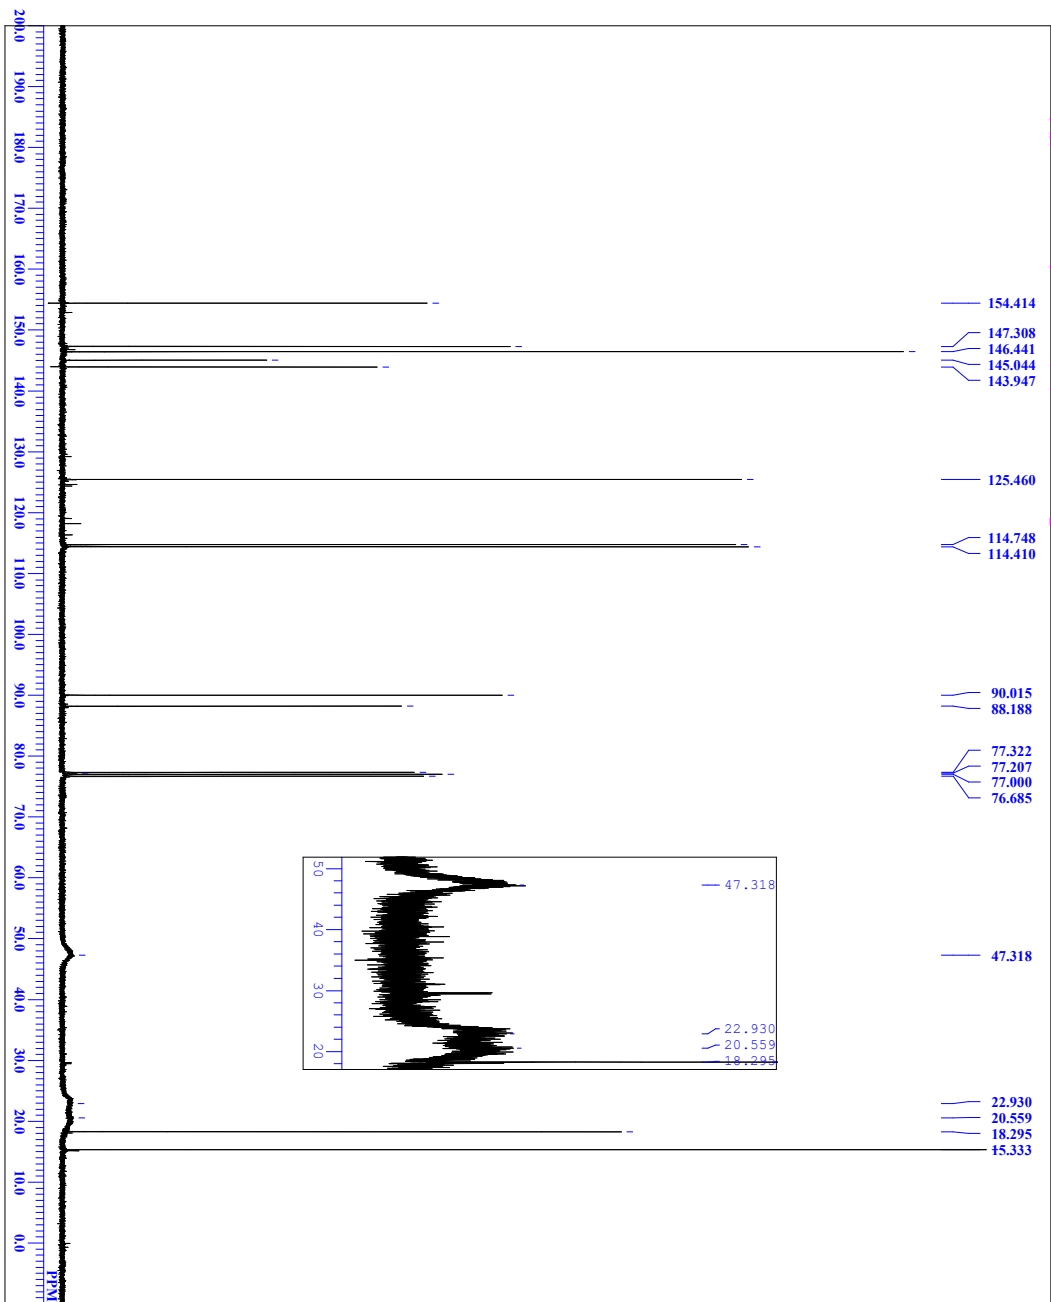

DNAME Y1329 carbon-13.als  
 CONT single pulse decoupled gated NOE  
 DATE\_ 2023-02-02 10:14:32  
 INSTR 13C  
 EXMOP carbon\_13p  
 OBPRQ 100.63 MHz  
 OBSET 482 KHz  
 OBHN 0.13 Hz  
 POINT 32768  
 FREQOU 25252.59 Hz  
 SCANS 2000  
 ACQTM 1.2976 sec  
 PD 1.7024 sec  
 PVI 3.75 usec  
 IRENUC 50.0 e  
 CTEMP CDCL3  
 SILVNT 77.00 ppm  
 EXREF 0.10 Hz  
 RGAIN S6

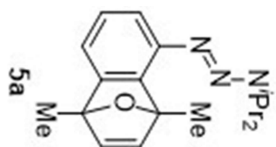

### 3-(3,3-Diisopropyltriaz-1-en-1-yl)-*N,N*-diethylaniline (5b)

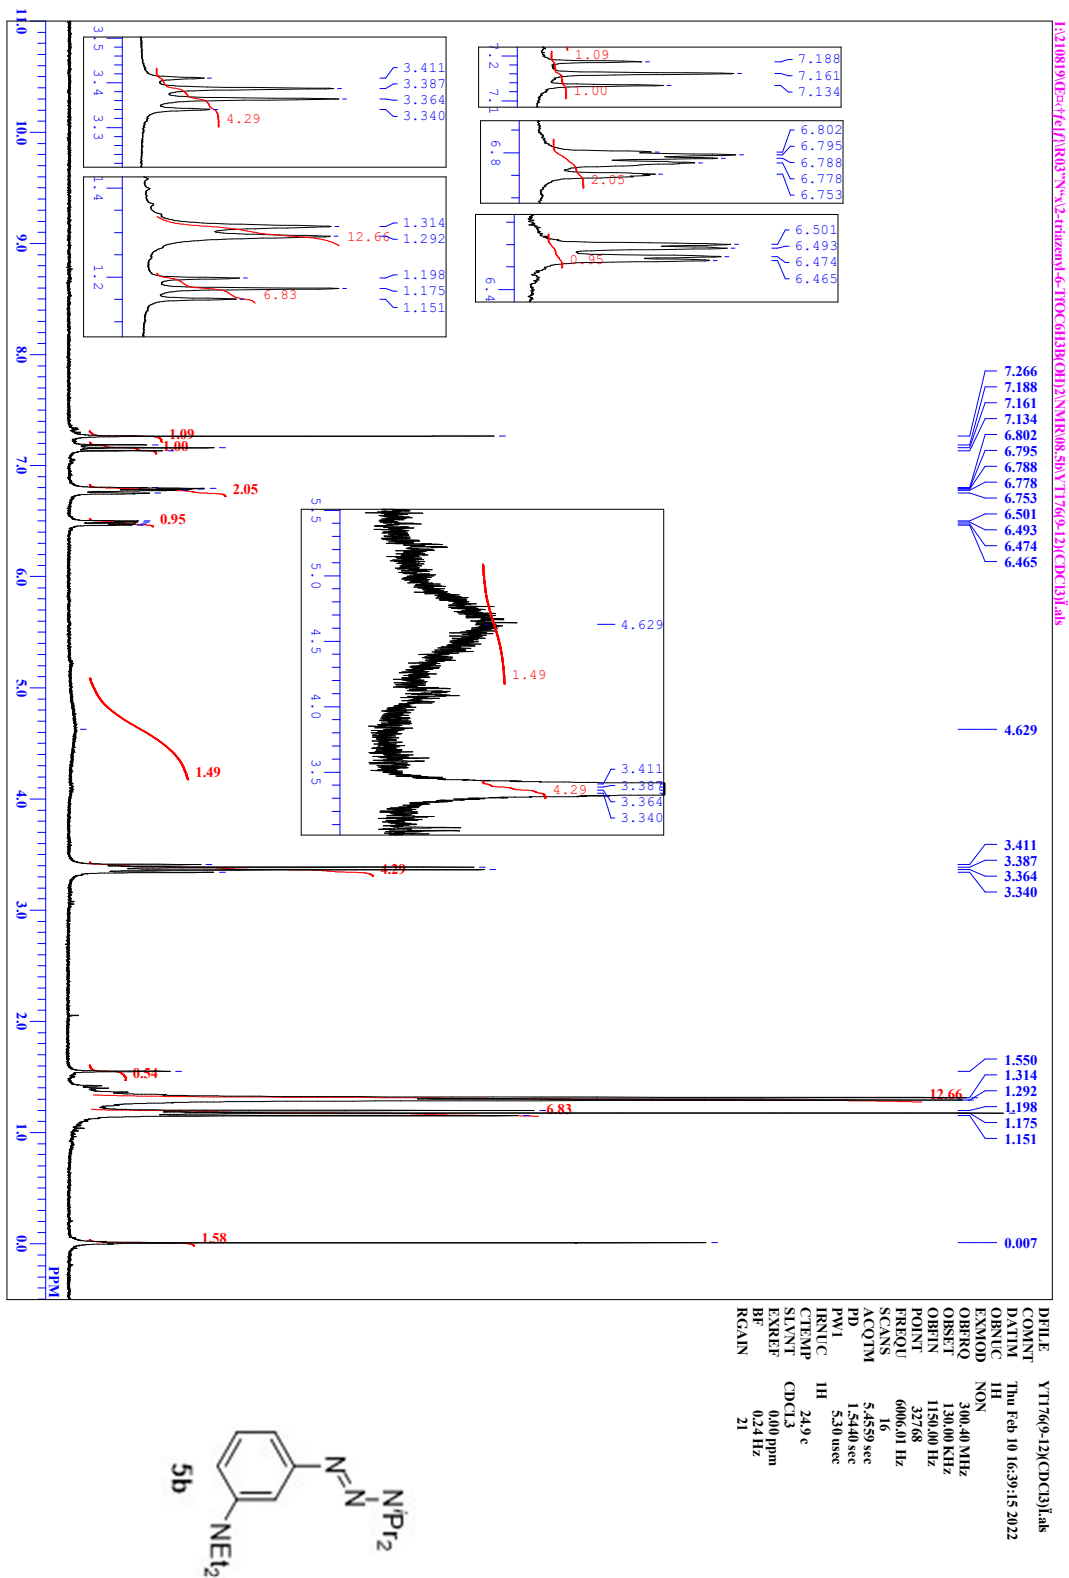

single pulse decoupled gated NOE

EX-C NMR/12.7A/250C/103V/cdethyamine\Y176\_E13C-1-flsh

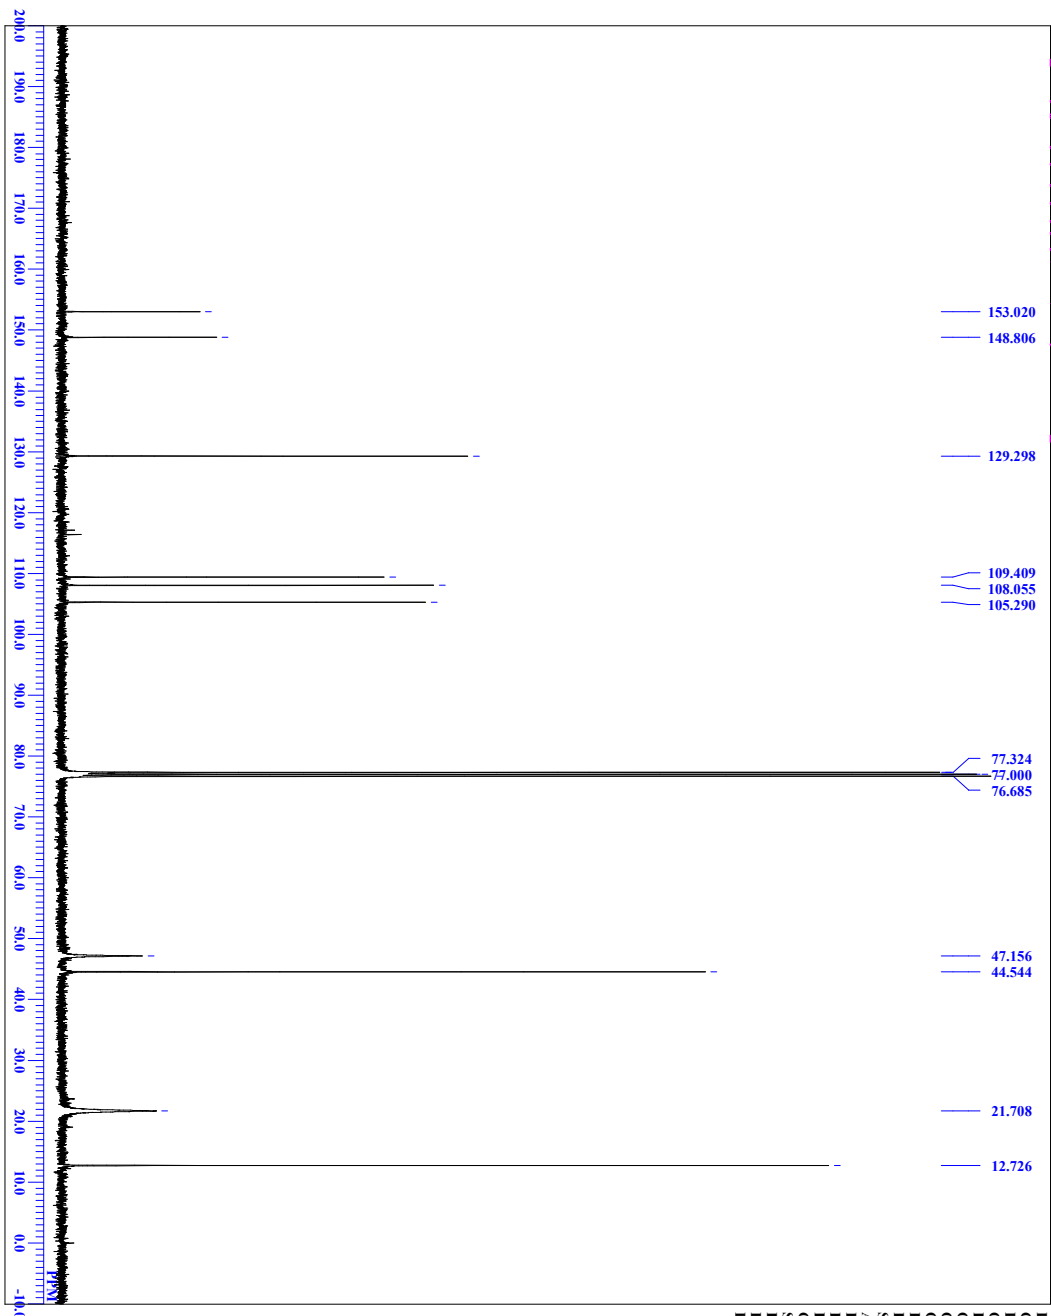

|        |                                  |
|--------|----------------------------------|
| DP1.E  | Y176_E13C-1-flsh                 |
| CONVT  | single pulse decoupled gated NOE |
| DATE_  | 2023-02-01 13:55:50              |
| ORNUC  | 13C                              |
| EXM0D  | single_pulse_dec                 |
| ORPRO  | 100.53 MHz                       |
| ORSET  | 5.35 KHz                         |
| ORFIN  | 5.86 Hz                          |
| POINT  | 26214                            |
| FREQ0U | 251256.9 Hz                      |
| SCANS  | 2000                             |
| ACQTM  | 1.0433 sec                       |
| PD     | 2.0000 sec                       |
| PVI    | 3.60 usec                        |
| IRNUC  | 1H                               |
| CTEMP  | 50.0 c                           |
| SLEVT  | CDCL3                            |
| EXREF  | 77.00 ppm                        |
| BF     | 1.20 Hz                          |
| RGAIN  | 60                               |

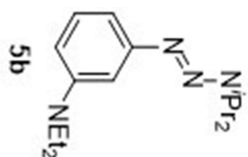



single pulse decoupled gated NOE

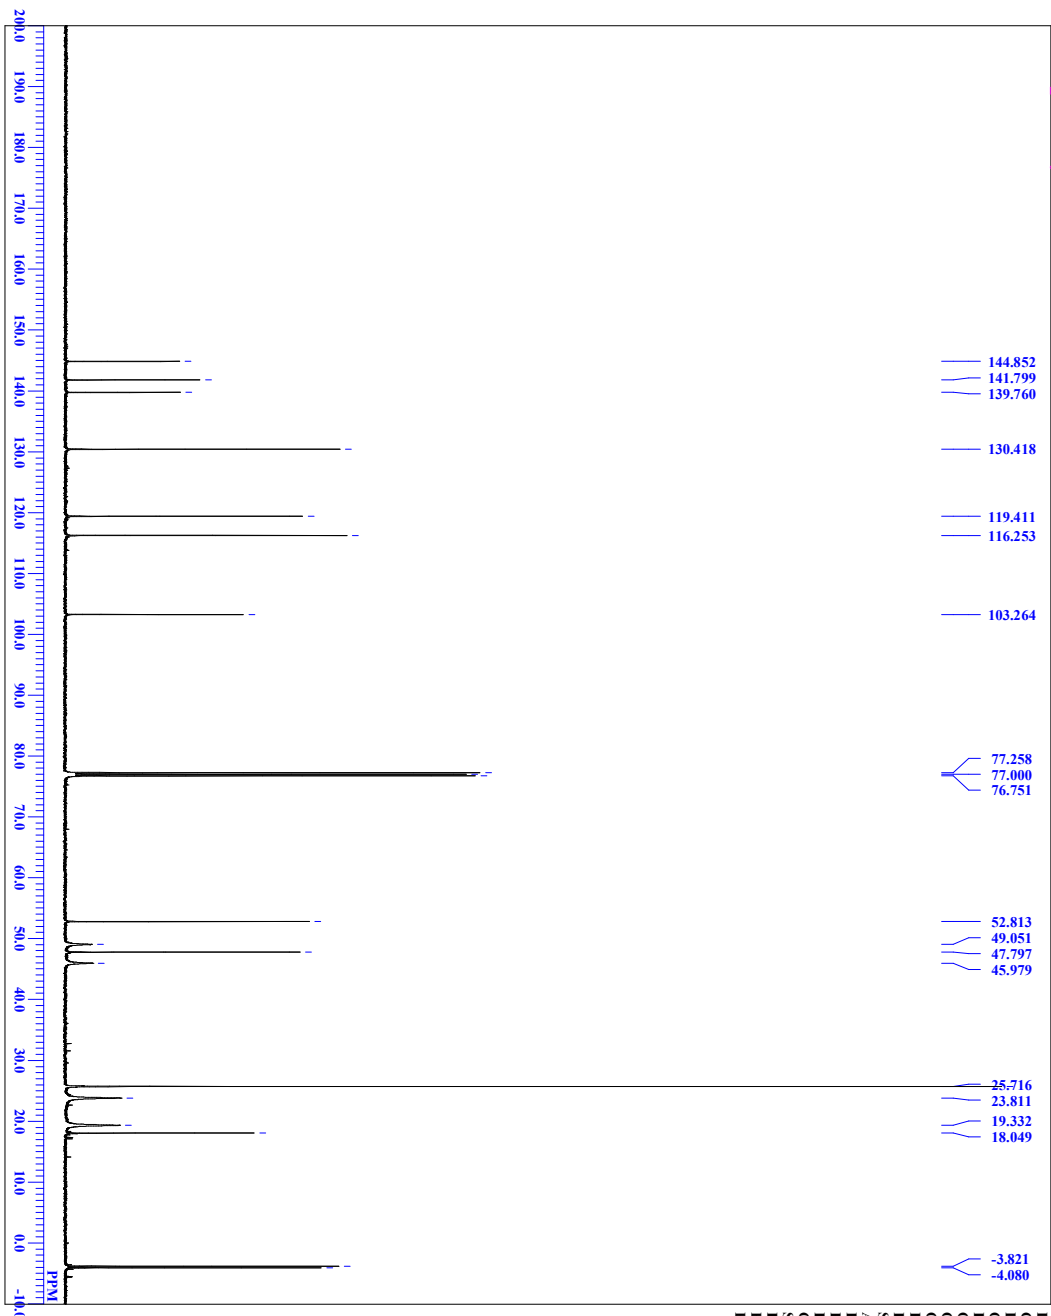

23c012\_carbon-17.jdt  
 single pulse decoupled gated NOE  
 DATE\_ 2023-09-27 11:16:54  
 COUNT 132  
 DATTM 132  
 ORNUC 13C  
 EXM0D carbon\_17p  
 ORPRO 124.51 MHz  
 OBSFQ 3.45 KHz  
 OBSST 6.00 Hz  
 POIN1 32780  
 FREQ0 3906250 Hz  
 SCANS 2000  
 ACQTM 0.8389 sec  
 PD 2.0000 sec  
 PVI 3.77 usec  
 IREN1G 1H 24.5 e  
 CTEMP CDCL3 77.00 ppm  
 SLVNT EXREF 0.00 Hz  
 BR 60  
 RCYAN 60

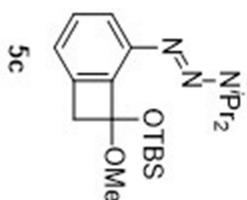



6-(3,3-Diisopropyltriaz-1-en-1-yl)benzocyclobuten-1-one (S8)

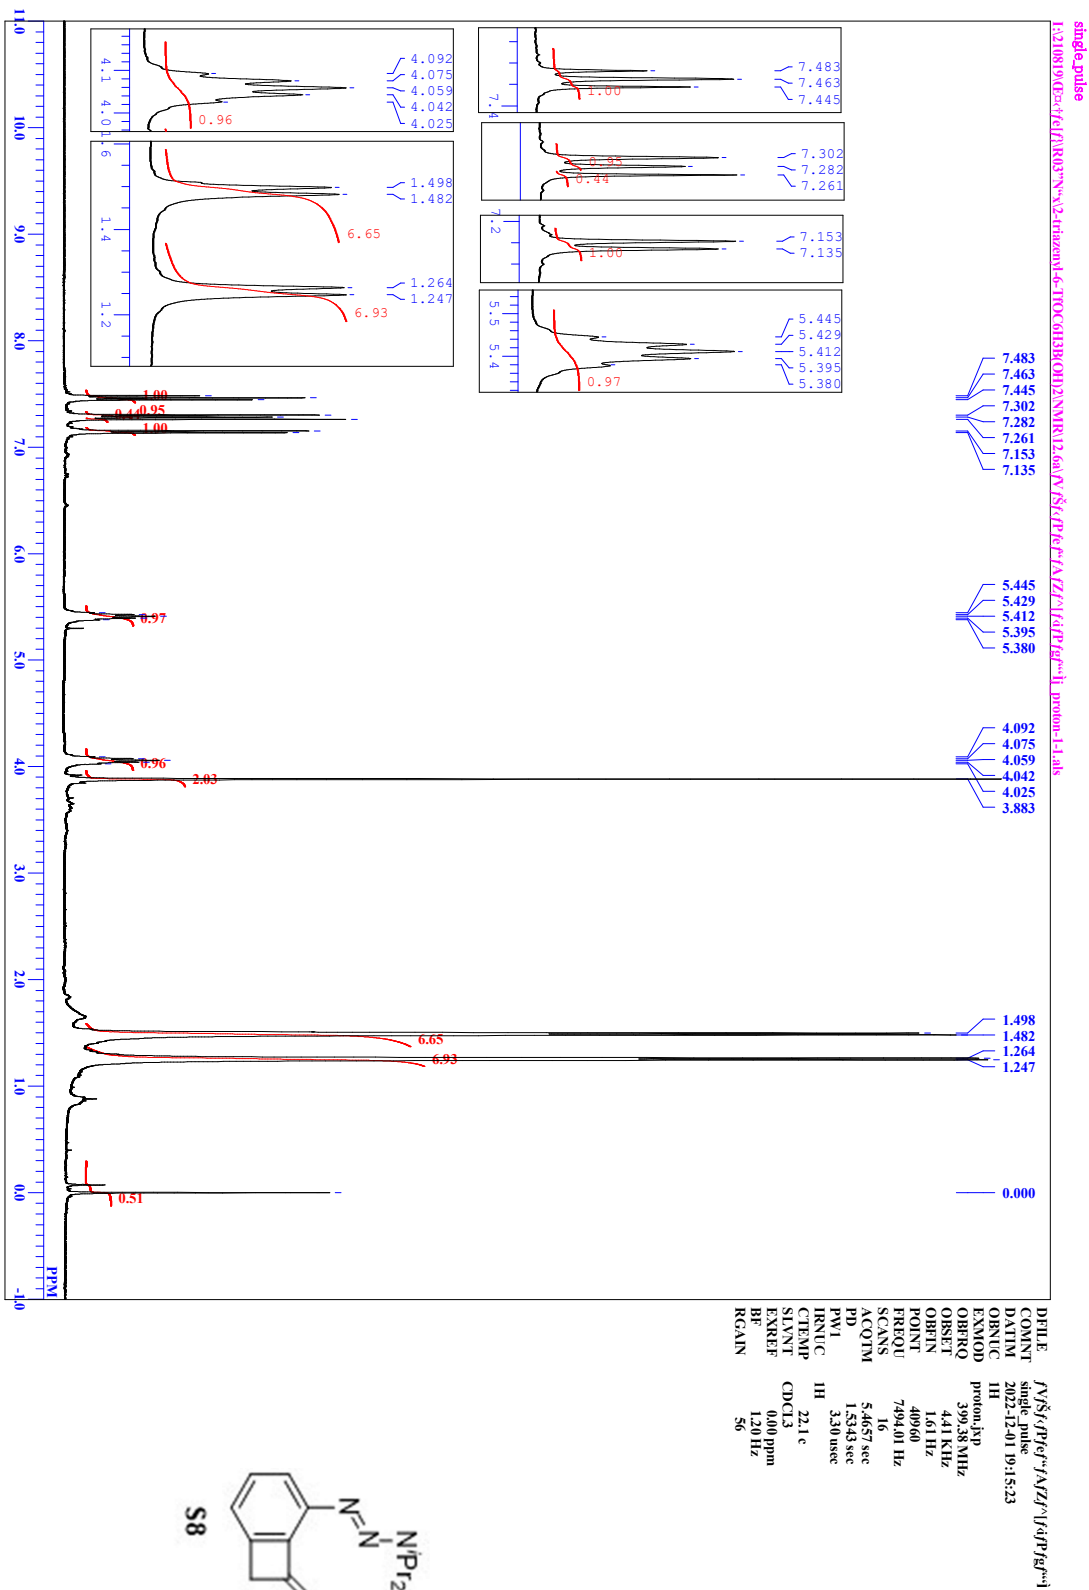

single pulse decoupled gated NOE

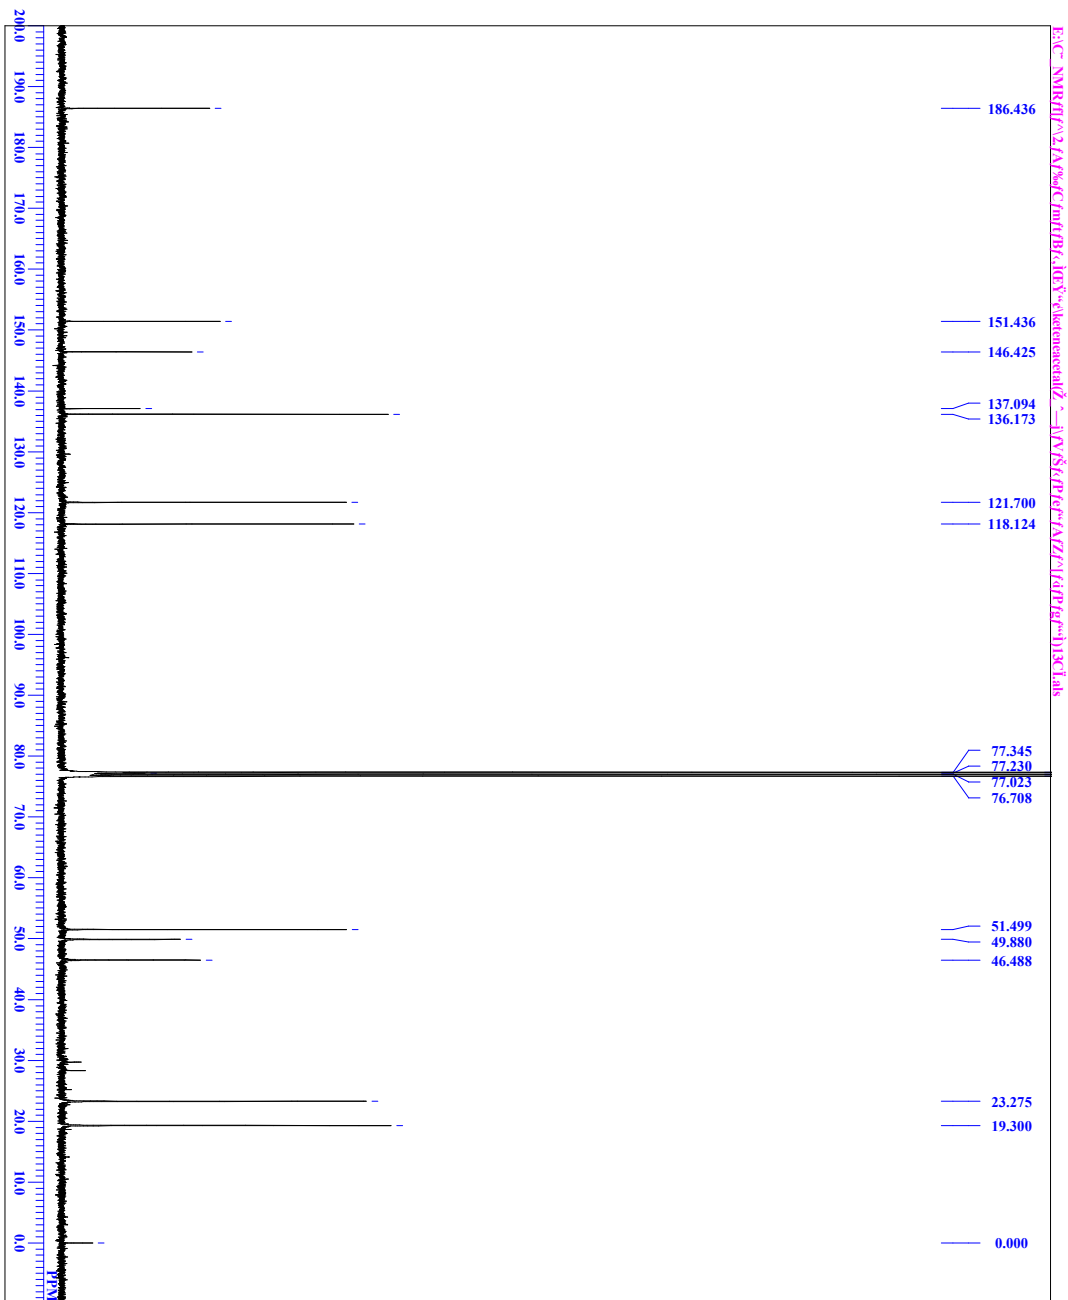

DTITLE:  $N,N'$ -di-*i*-propyl-*N,N'*-azobis(1*H*-indoliz-2(1*H*)-one)  
 single pulse decoupled gated NOE  
 CONVNT: 2022-12-01 19:17:52  
 DATEM: 13C  
 ORNUC: 13C  
 EXM00D: carbon,isp  
 OBSRO: 100.43 MHz  
 OBSST: 4.82 KHz  
 OBSFN: 0.13 Hz  
 POINT: 32768  
 FREQOU: 25252.59 Hz  
 SCANS: 5000  
 ACQTM: 1.2976 sec  
 PD: 1.7024 sec  
 PVI: 3.75 usec  
 IRENUG: 1H  
 CTEMP: 21.9 c  
 SLEVT: CDCl3  
 EXREF: 0.00 ppm  
 BR: 1.20 Hz  
 RGAIN: 56

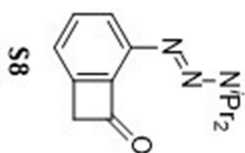

2-(*tert*-Butyl)-4-(3,3-diisopropyltriaz-1-en-1-yl)-3-phenyl-2,3-dihydrobenzo[*d*]isoxazole (5d)

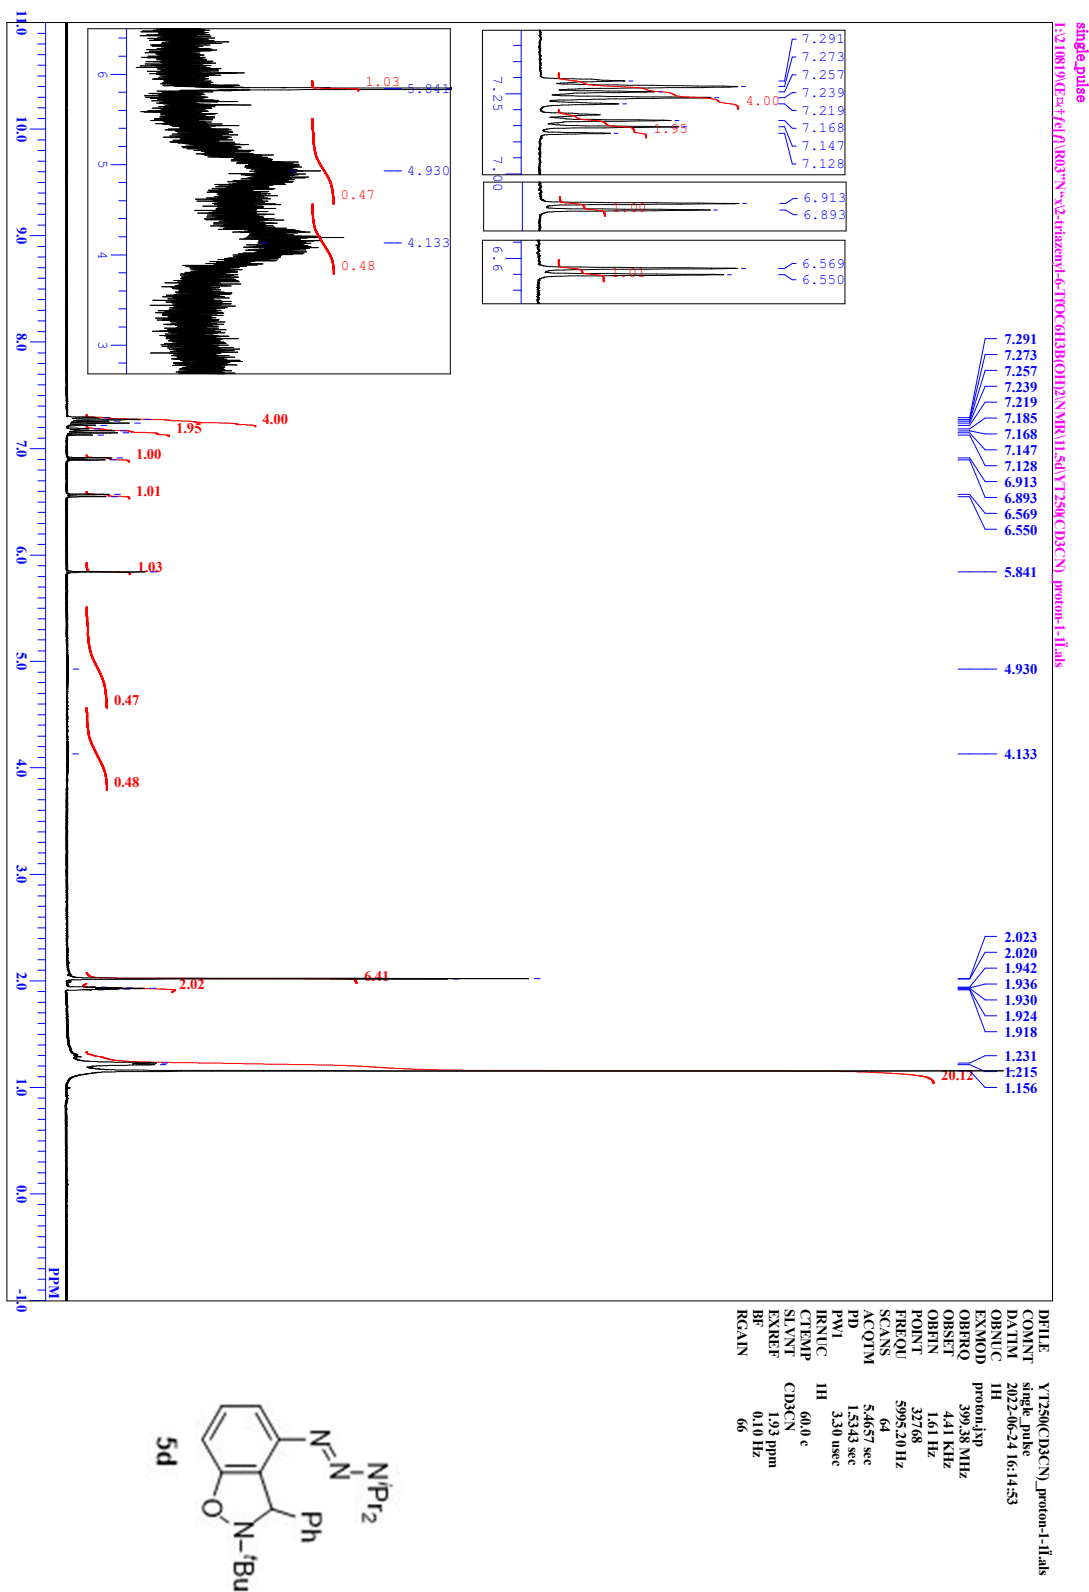

single pulse decoupled gated NOE

EX-C NMR.DI\A2\A\256\CD3OD\13C\1.s

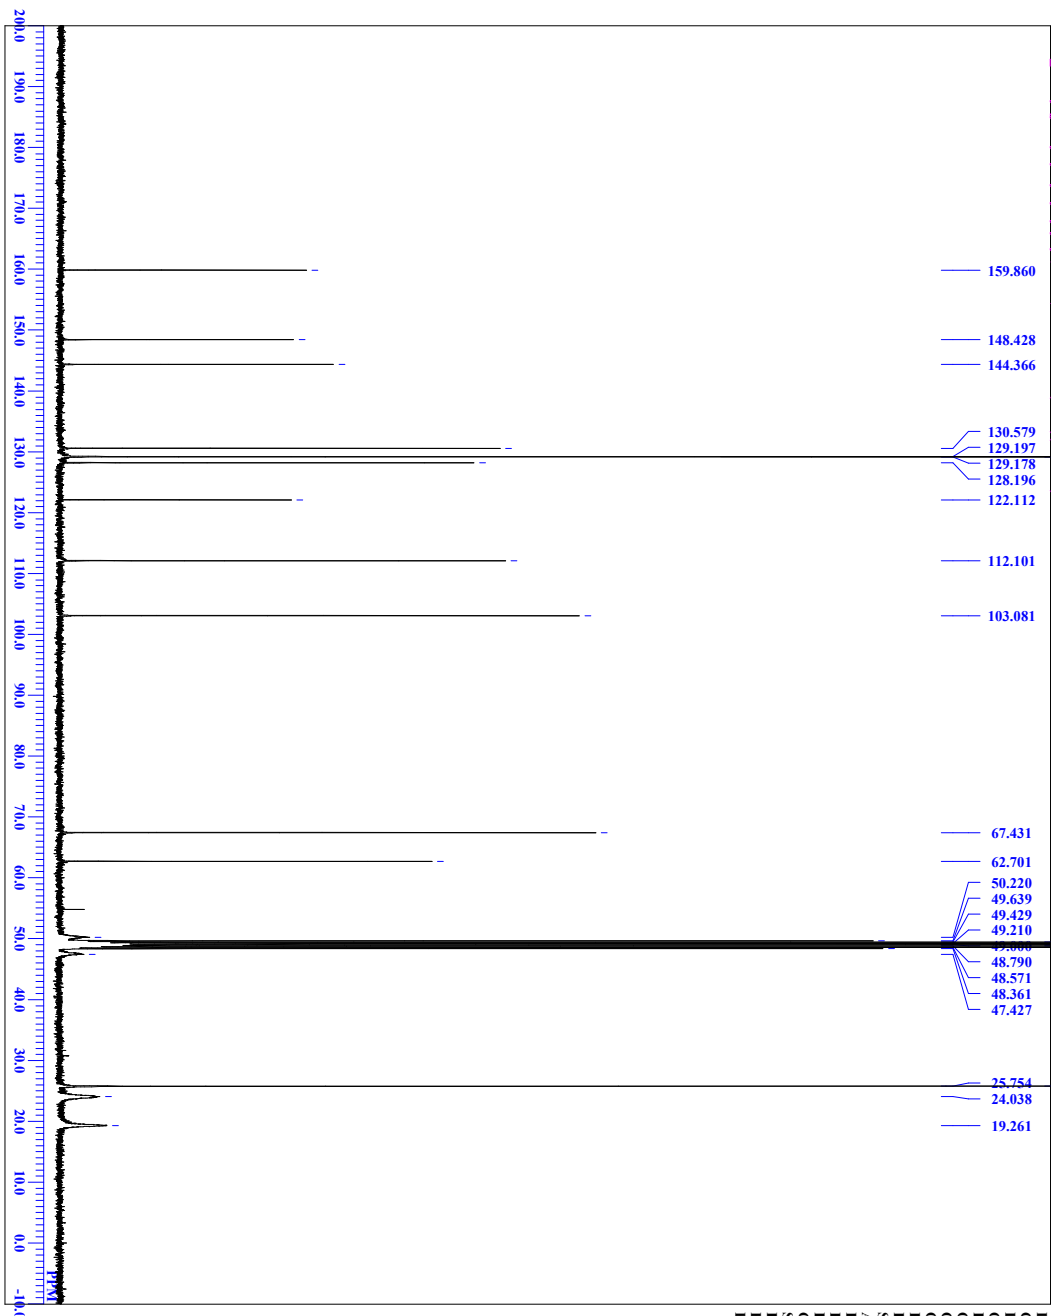

DTITLE Y1256(20-23)(CD3OD)13C1.s  
 COUNT 1  
 DATE\_ 2022-06-23 20:10:39  
 TIME 13:00  
 EXNMOD single\_pulse\_dec  
 OBSFREQ 100.625 MHz  
 OBSFREQ 5.35 KHz  
 OBSFREQ 5.86 Hz  
 POINT 26214  
 FREQ 251256.3 Hz  
 SCANS 8000  
 ACQTIME 1.0433 sec  
 PD 2.0000 sec  
 PULPROG zgpg30  
 PWD 3.60 usec  
 IRENF 20.9 e  
 CTE 49.00 ppm  
 SLS 49.00 ppm  
 EXREF 60  
 BR 60  
 RGAIN 60

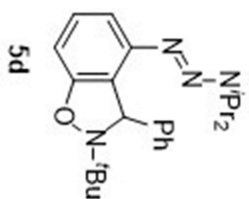

# 1-(1-*tert*-Butyl-1,4-dihydro-1,4-epoxynaphthalen-5-yl)-3,3-diisopropyltriazen-1-ene (5e)

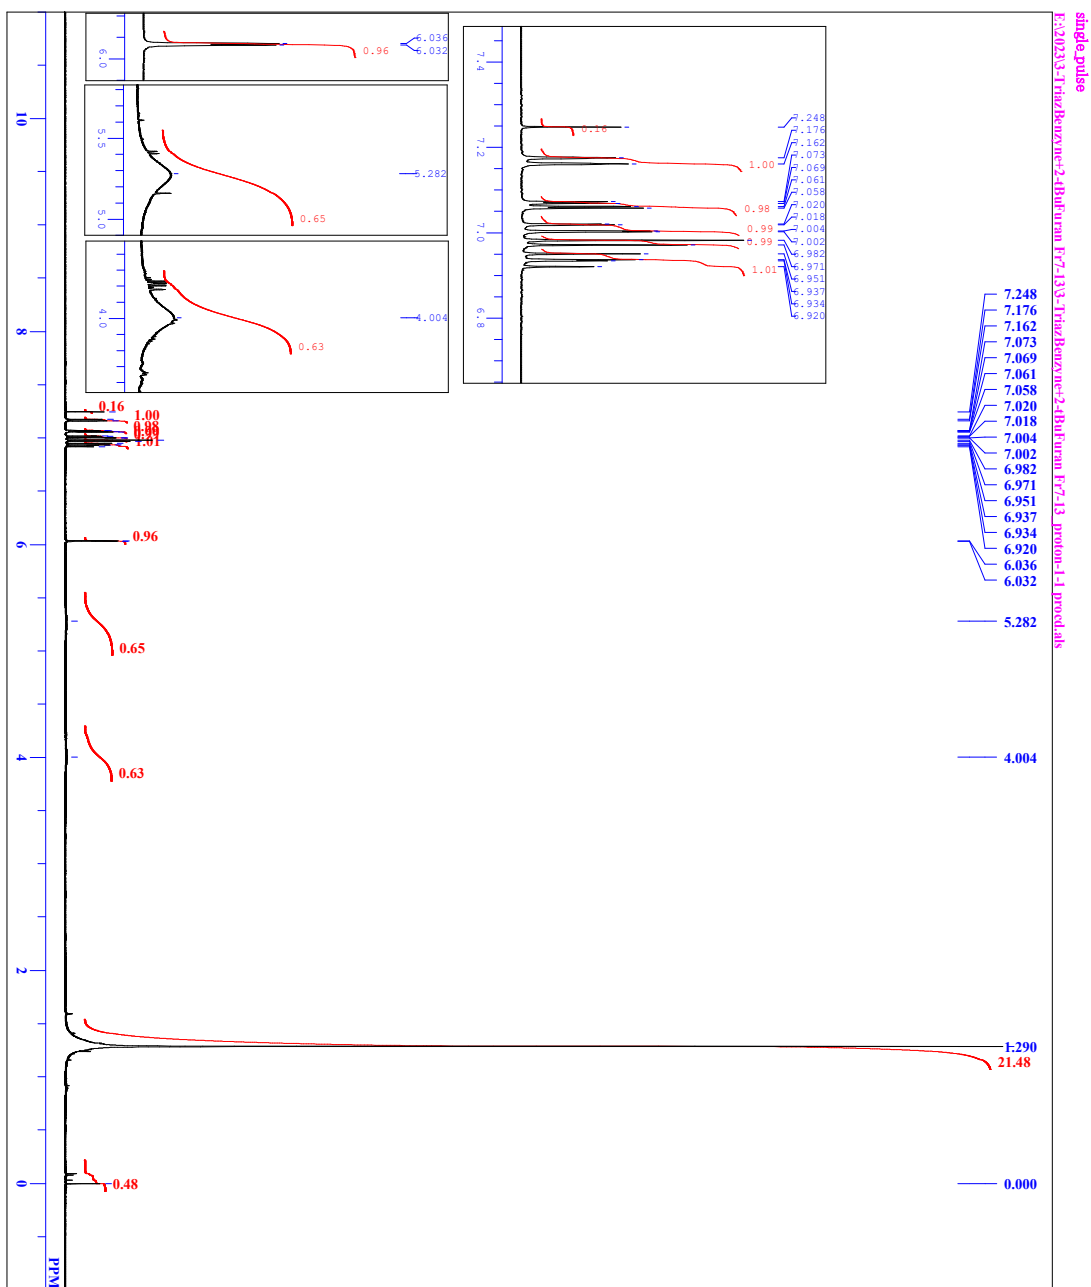

FILE 3-TriazBenzene-2-tBuFuran-F7-  
 COMPT single\_pulse  
 DATIM 2023-10-30 13:14:02  
 OBNIC 1H  
 EXMCD proton\_exp  
 OBRQ 500.16 MHz  
 OBSF 26214  
 OBRN 6.01 Hz  
 POINT 7.241 KHz  
 PRQ 7507.51 Hz  
 SCANS 8  
 ACOIM 3.4918 sec  
 PD 5.0000 sec  
 PW 3.00 usec  
 IRNUC 1H  
 CTMPC 22.5c  
 SLYNT CDCl3  
 EXREF 0.00 ppm  
 BF 0.10 Hz  
 RGAIN 36

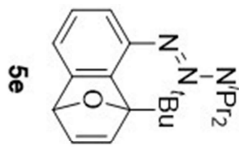

single pulse decoupled gated NOE

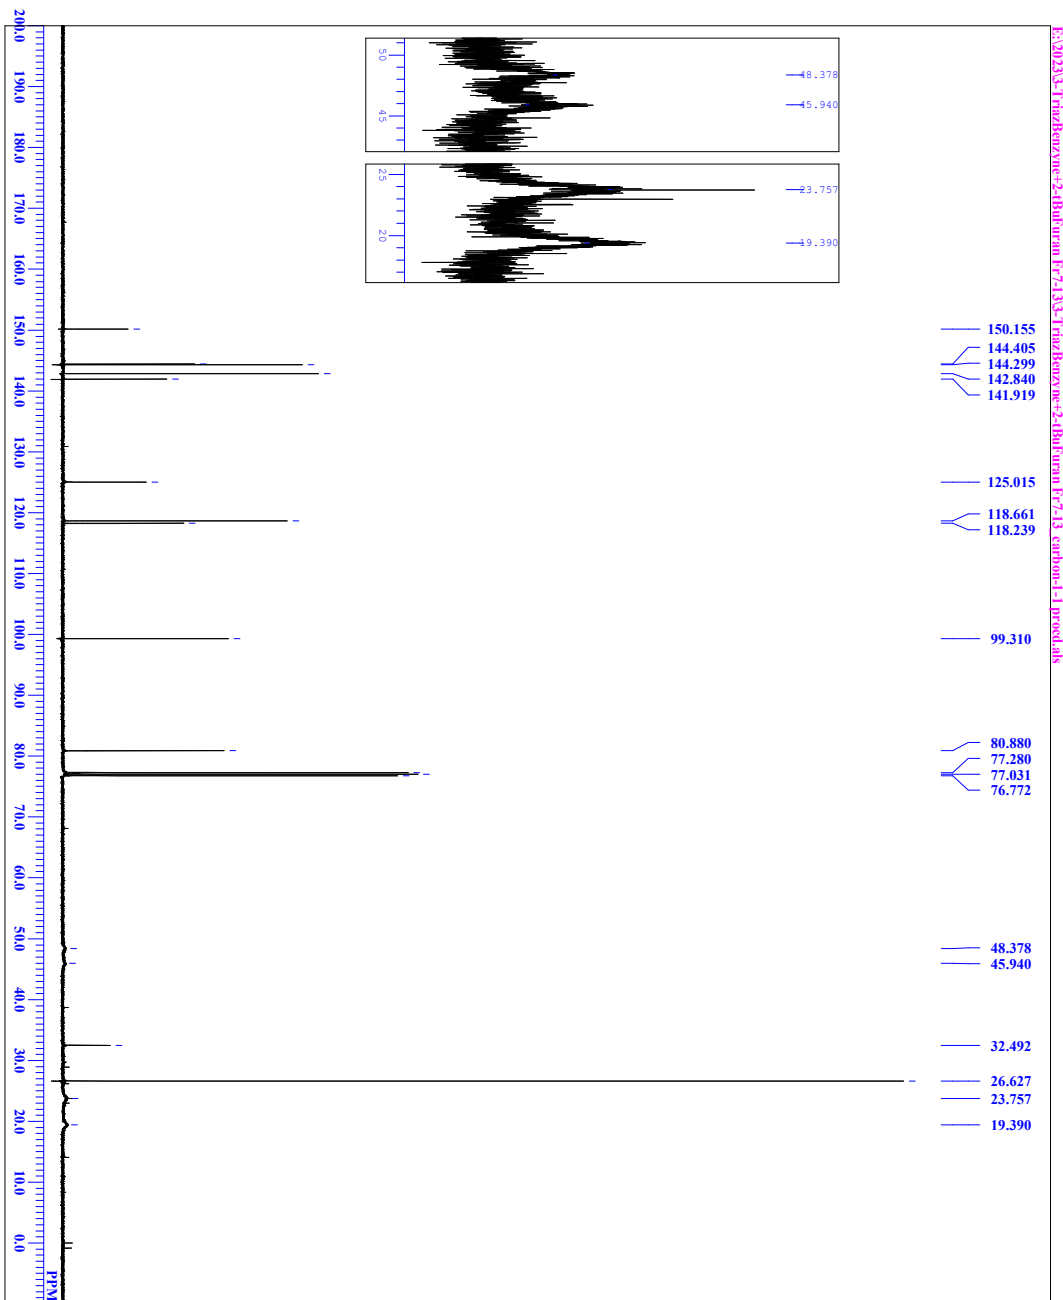

D1L1E 3-Triaizbenzene+2-tBuFuran F7-  
 CONT single pulse decoupled gated NOE  
 D1ATM 2023-10-30 13:37:25  
 ORNUC 13C  
 EXM0D carbon13p  
 ORPRO 125.77 MHz  
 OBSER 7.87 KHz  
 OBHN 4.21 Hz  
 POINT 26214  
 FREQOU 31644537 Hz  
 SCANS 2048  
 ACQTM 0.8284 sec  
 PD 2.0000 sec  
 PVI 3.46 usec  
 IRENIG 1H  
 CTEMP 22.7 c  
 SLENT CDCL3  
 EXREF 0.00 ppm  
 BP 0.10 Hz  
 RGAIN 36

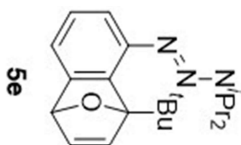

1-(4-*tert*-Butyl-1,4-dihydro-1,4-epoxynaphthalen-5-yl)-3,3-diisopropyltriazen-1-ene (5e')

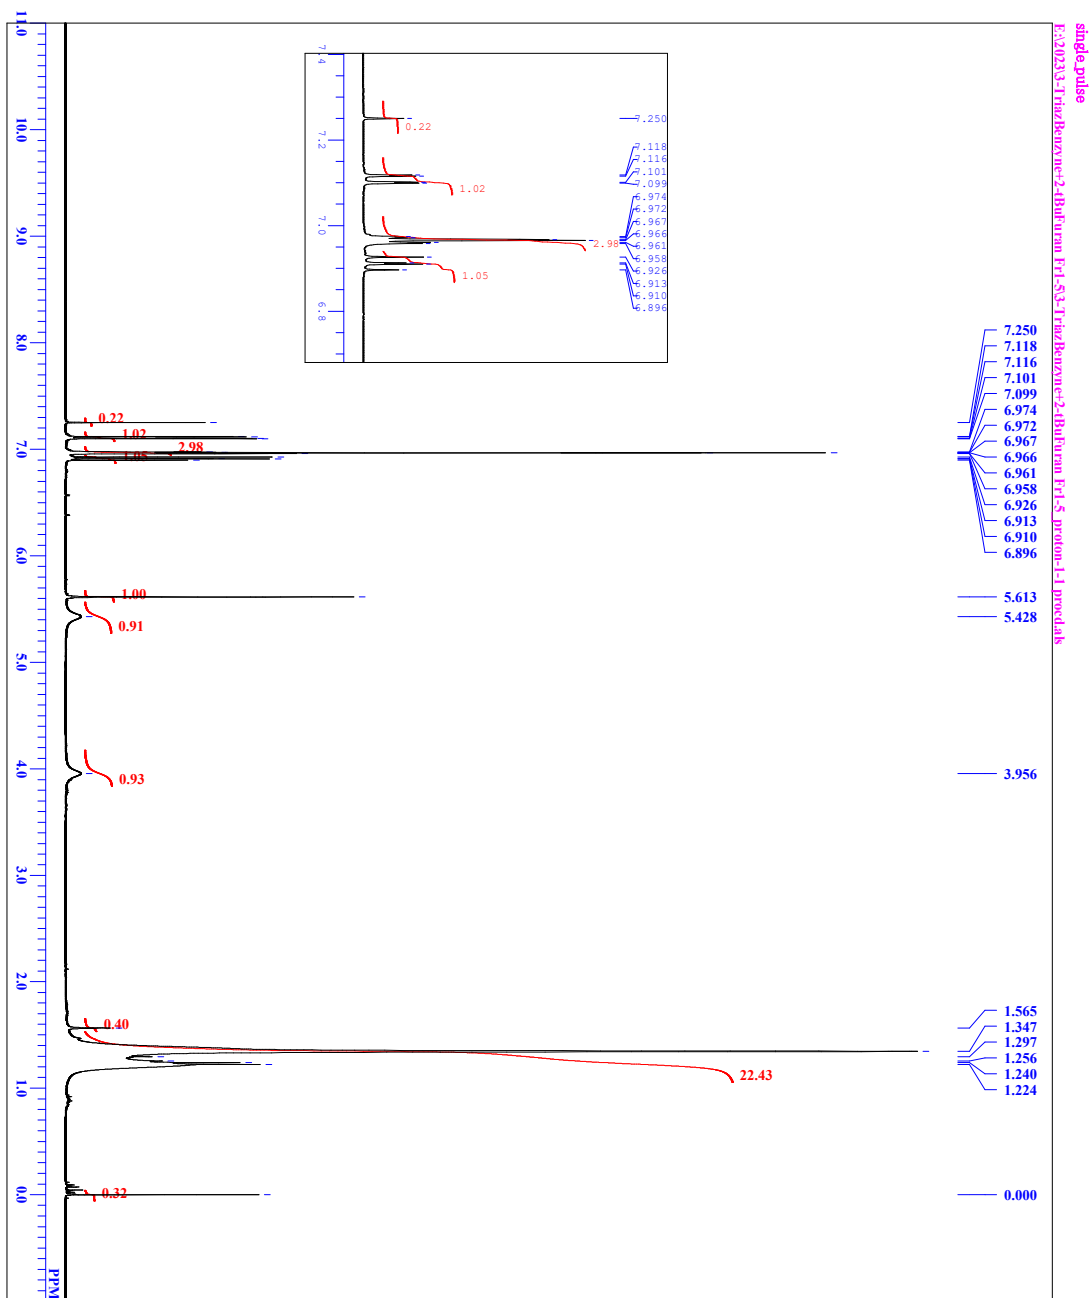

single pulse  
E:32023-3-TriaZBenzene+2-tBuFuran F1-5-3-TriaZBenzene+2-tBuFuran F1-5-proton-1-1-procdak

FILE 3-TriaZBenzene+2-tBuFuran F1-  
 COMPT single\_pulse  
 DATIM 2023-10-30 12:13:39  
 OBNIC 1H  
 EXMID proton\_1xp  
 OBRQ 500.16 MHz  
 OBSF1 26214  
 OBRN 6.01 Hz  
 POINT 7.9751 Hz  
 FREQ 7507.51 Hz  
 SCANS 8  
 ACOIM 3.4918 sec  
 PD 5.0000 sec  
 PW1 3.00 usec  
 IRNIC 1H  
 CTEMP 22.5c  
 SLYNT CDCl3  
 EXREF 0.00 ppm  
 BF 0.10 Hz  
 RGAIN 36

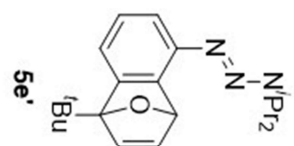

single pulse decoupled gated NOE

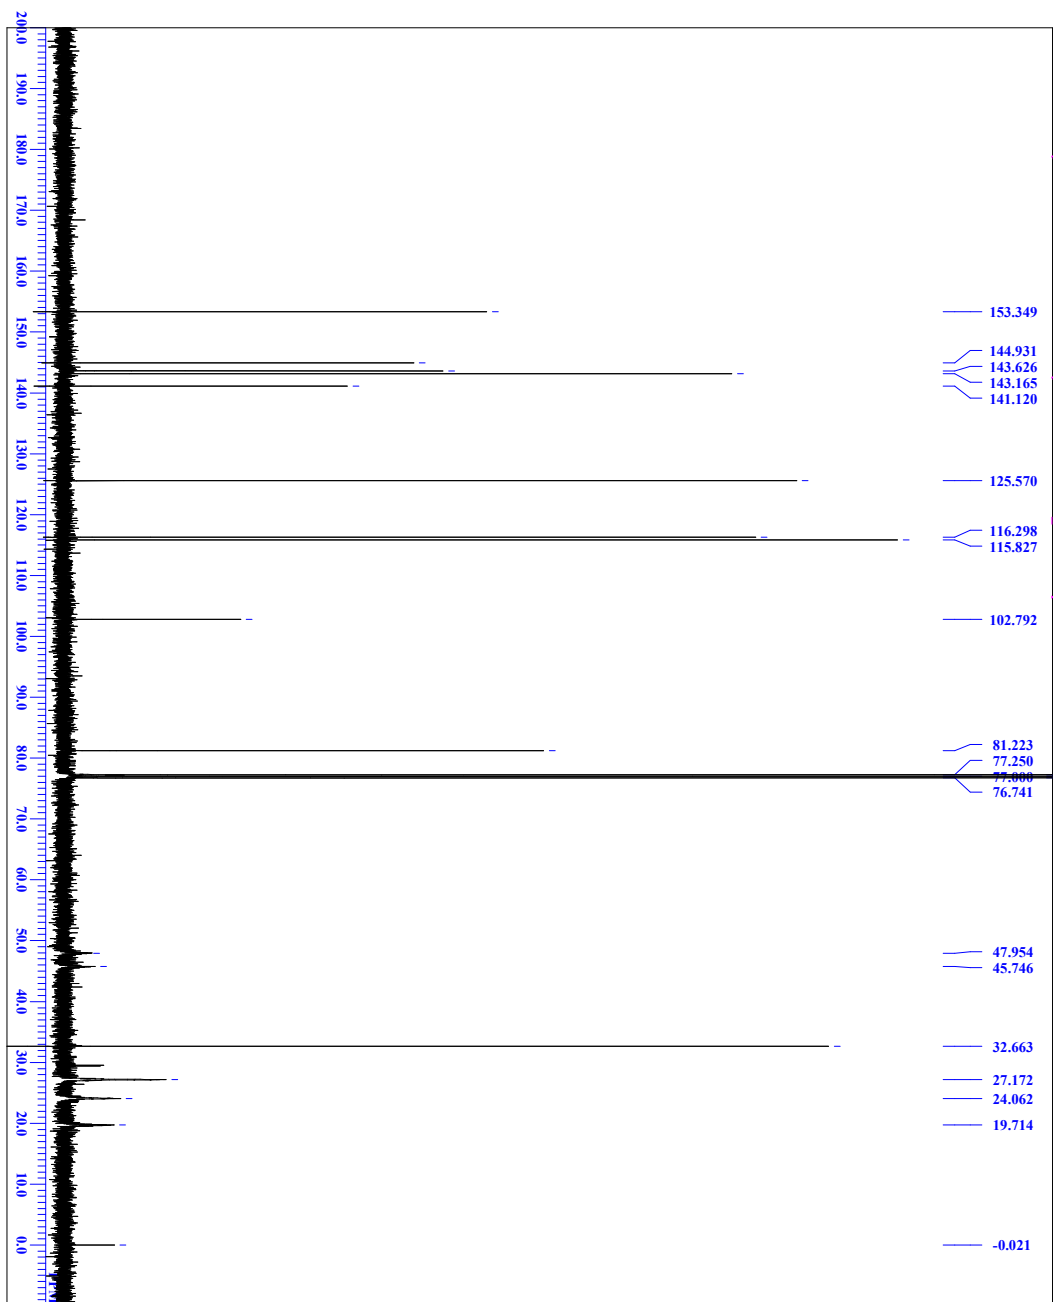

D1L1E 3-TriaizBenzene+2-tBuFuran P-1  
 COUNT single pulse decoupled gated NOE  
 D1A1M 2023-10-30 11:59:36  
 ORNUC 13C  
 EXM0D carbon13p  
 OBSF0 125.77 MHz  
 OBSF1 7.87 KHz  
 OBSF2 4.21 Hz  
 POINT 26214  
 FREQ0U 3164537 Hz  
 SC/ANS 600  
 ACQTM 0.8284 sec  
 PD 2.0000 sec  
 PVI 3.46 usec  
 IRNUC 1H  
 CTEMP 22.6 c  
 SLENT CDCL3  
 EXREF 77.00 ppm  
 BP 0.10 Hz  
 RGAIN 36

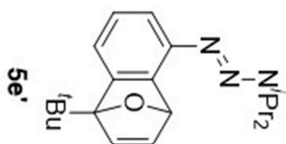



2-(*tert*-Butyl)-3,4-diphenyl-2,3-dihydrobenzo[*d*]isoxazole (S9)

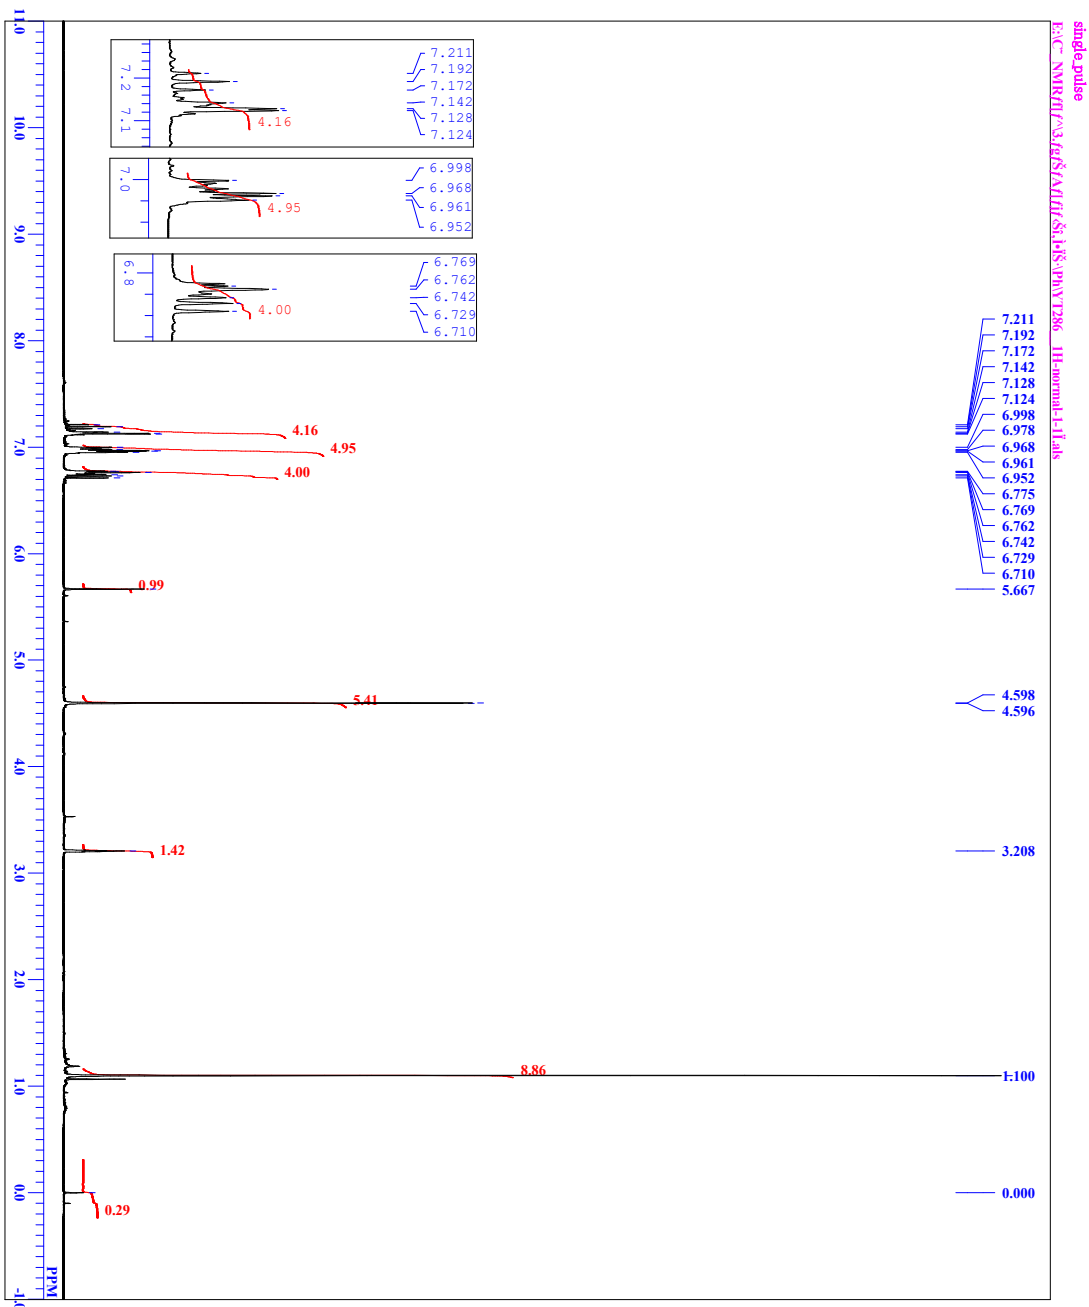

FILE: Y1286\_11-normal-1-11-1.s  
 CONIN: single\_pulse  
 DATIM: 2022-11-12 11:19:05  
 OBNUC: 1H  
 EXMID: single\_pulse.fxp  
 OBRFQ: 399.78 MHz  
 OBSF1: 419 KHz  
 OBRFN: 7.29 Hz  
 POINT: 26214  
 PRFQ: 600240 Hz  
 SCANS: 16  
 ACOIM: 4.5673 sec  
 PD: 5.0000 sec  
 PW1: 3.35 usec  
 IRNUC: 1H  
 CTEMP: 40.0 c  
 SLYNT: CD3OD  
 EXREF: 0.00 ppm  
 BF: 0.10 Hz  
 RGAIN: 38

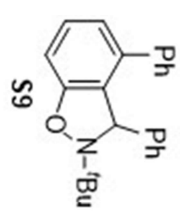

single pulse decoupled gated NOE

EXP: NMR1D1\_3\_475A01018\_1.HS.PM17286\_E1A31.als

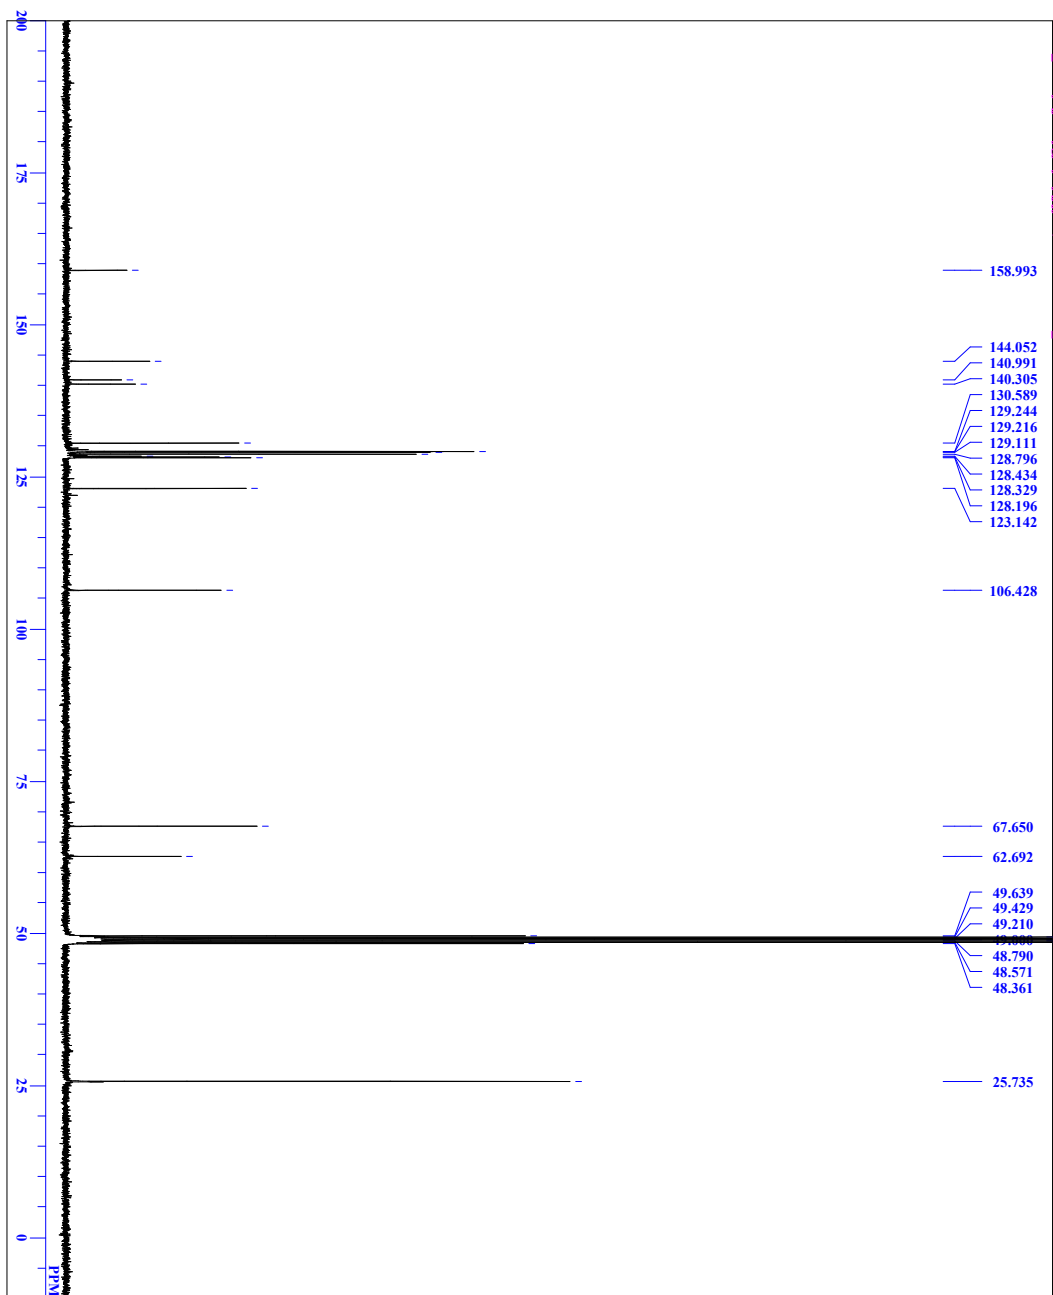

FILE: Y17286\_E1A31.als  
 CONT: single pulse decoupled gated NOE  
 DATE\_: 2022-11-12 11:24:18  
 D1: 1.30  
 ORNUC: <sup>13</sup>C  
 EXM10D: single\_pulse\_dec  
 OBSF10: 100.53 MHz  
 OBSF1: 5.35 KHz  
 OBSF2: 5.86 Hz  
 P1: 26214  
 P1OFF: 2512563 Hz  
 FREQ10: 3500  
 SCANS: 10833 sec  
 ACQTM: 21000 sec  
 PD: 3.60 usec  
 PVI: 40.0°  
 IRR10C: 49.00 ppm  
 CTEM1P: 49.00 ppm  
 SLVNT: CD3OD  
 EXREF: 1.20 Hz  
 BP: 60  
 RCGAIN: 60

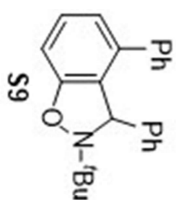

4-Azido-2-(*tert*-butyl)-3-phenyl-2,3-dihydrobenzo[*d*]isoxazole (S10)

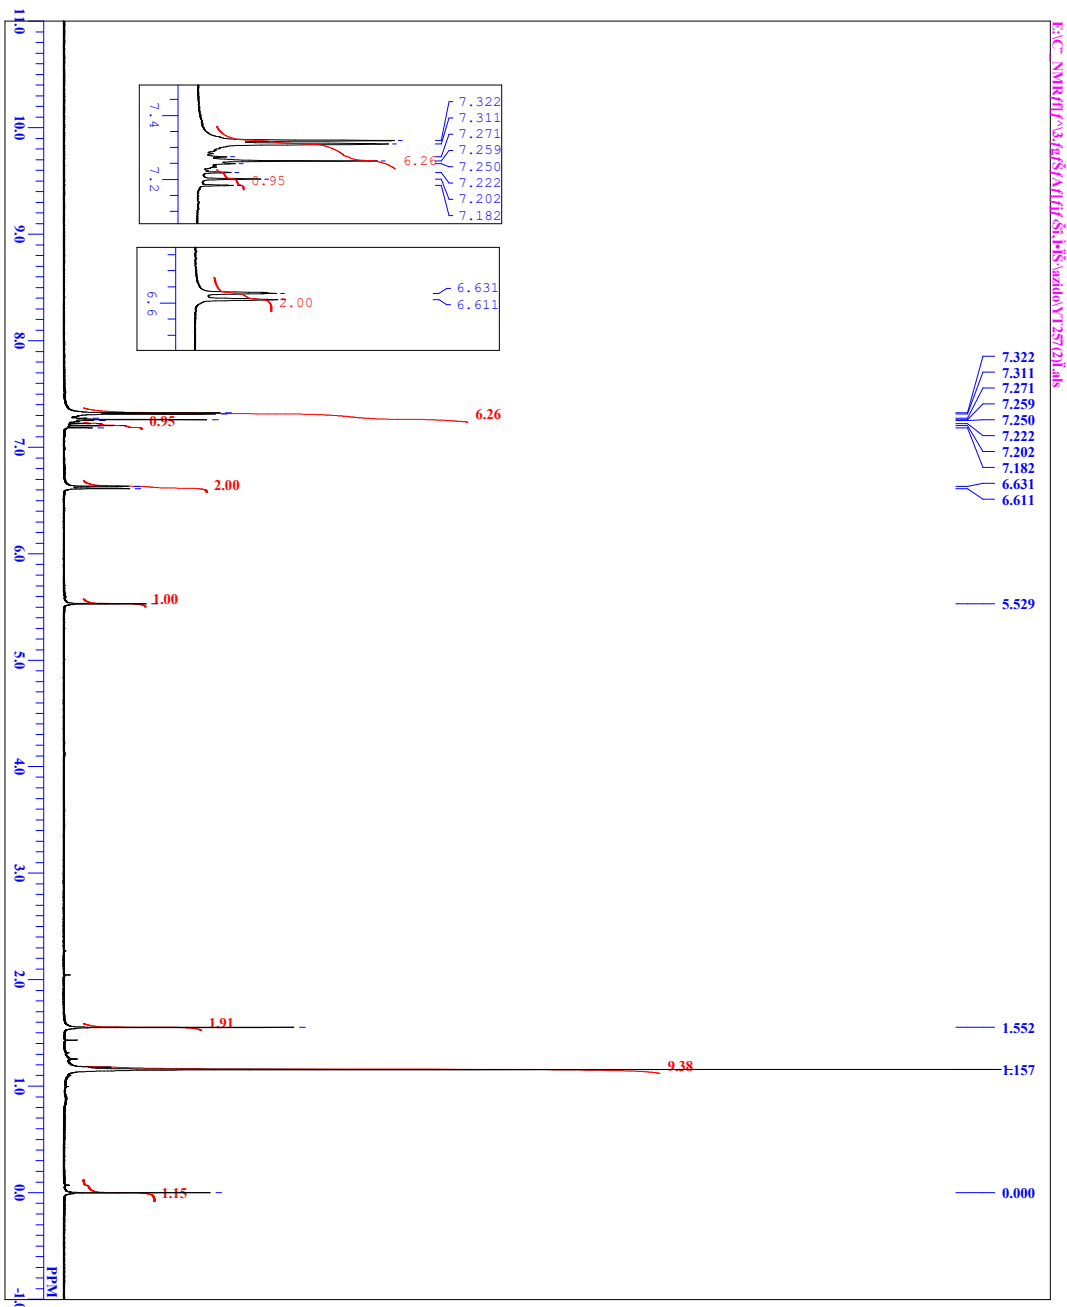

FILE: NMR/017/13/645/AM/1725/1725/21/ab

FILE: Y1725/21/ab  
 CONIN: S10  
 DATIM: Sun Jul 02 15:32:31 2022  
 OBNIC: 1H  
 EXMID: NON  
 OBRQ: 399.65 MHz  
 OBSF: 124.00 KHz  
 OBRN: 10506.00 Hz  
 POINT: 32768  
 PRQ: 7992.01 Hz  
 SCANS: 16  
 ACO: 4.1001 sec  
 PD: 4.9500 sec  
 PW: 6.20 usec  
 IRNUC: 1H  
 CTMPC: 23.7 c  
 CDCL3: 0.00 ppm  
 SLVNT: CDCL3  
 EXREF: 0.10 Hz  
 RGAIN: 19

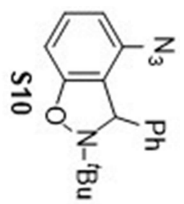

single pulse decoupled gated NOE

EX-C NMR.DI.03.HS.A.HI.38.HS.wadov.YT27(2)(H)(N3).E13C1.s8

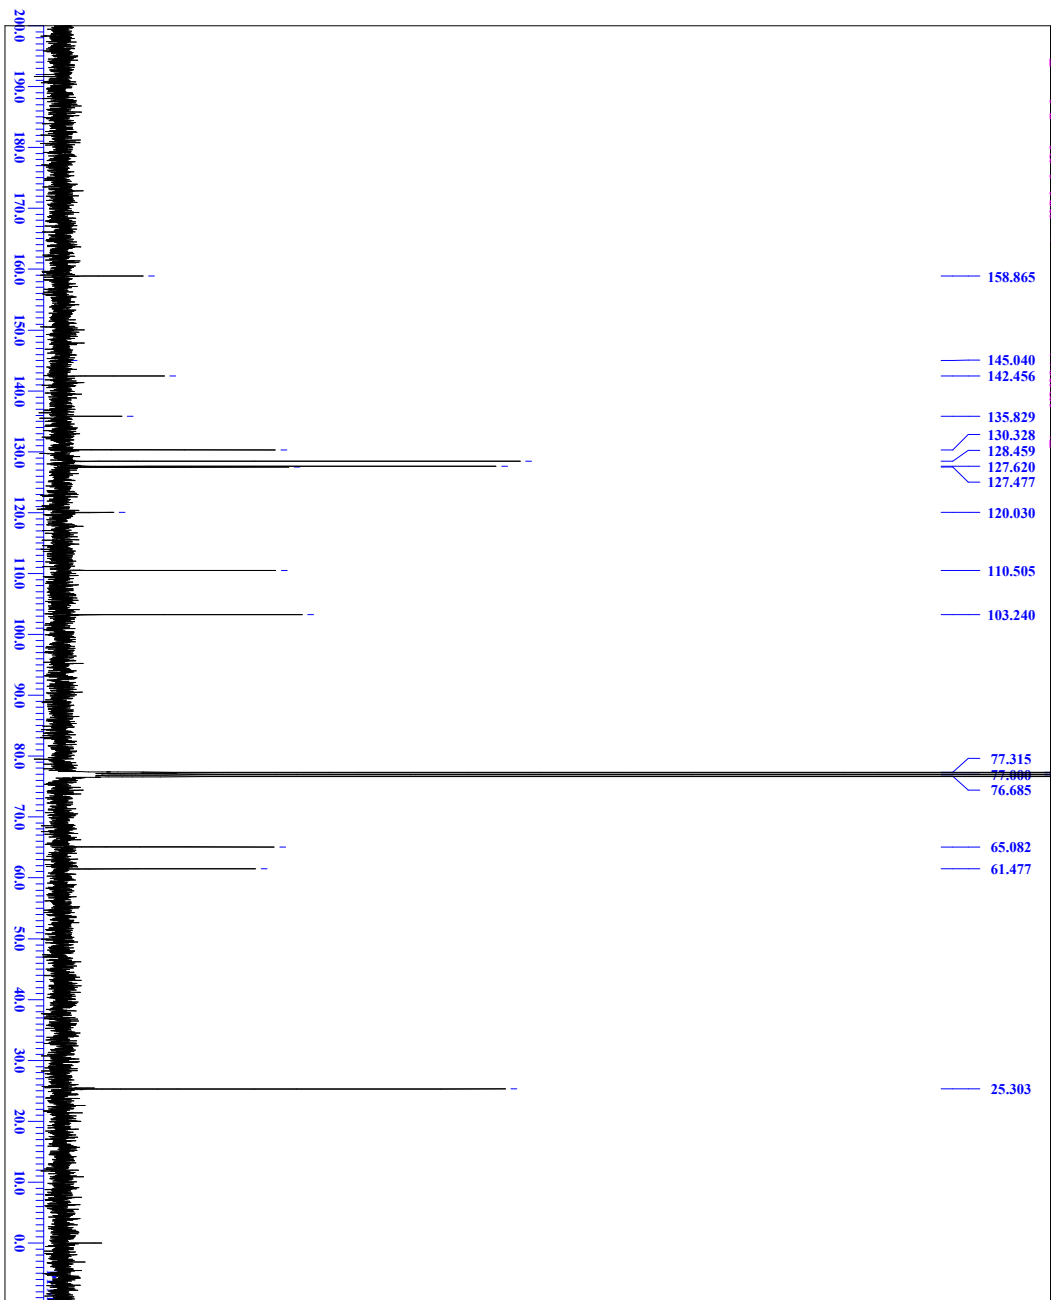

DTLE: YT27(2)(H)(N3).E13C1.s8  
 COUNT: 1022  
 DATE\_ TIME: 2022-07-02 16:22:02  
 ORNUC: 13C  
 EXMODO: single\_pulse\_dec  
 OBSFREQ: 100.53 MHz  
 OBSFREQ2: 5.35 KHz  
 OBSFREQ3: 5.86 Hz  
 PULPROG: zgpg30  
 POINT1: 26214  
 FREQP1: 251256.9 Hz  
 SCANS: 1000  
 ACQTIME: 1.0433 sec  
 PD: 2.0000 sec  
 PWD: 3.60 usec  
 IRRADIATE: 1H  
 CTEMP: 21.8 c  
 SLEW: CWCL3  
 SOLVENT: CDCL3  
 EXREF: 77.00 ppm  
 BR: 1.20 Hz  
 RGAIN: S8

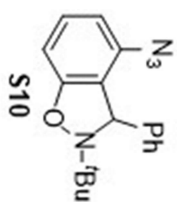

2-(*tert*-Butyl)-3-phenyl-4-styryl-2,3-dihydrobenzo[*d*]isoxazole (S11)

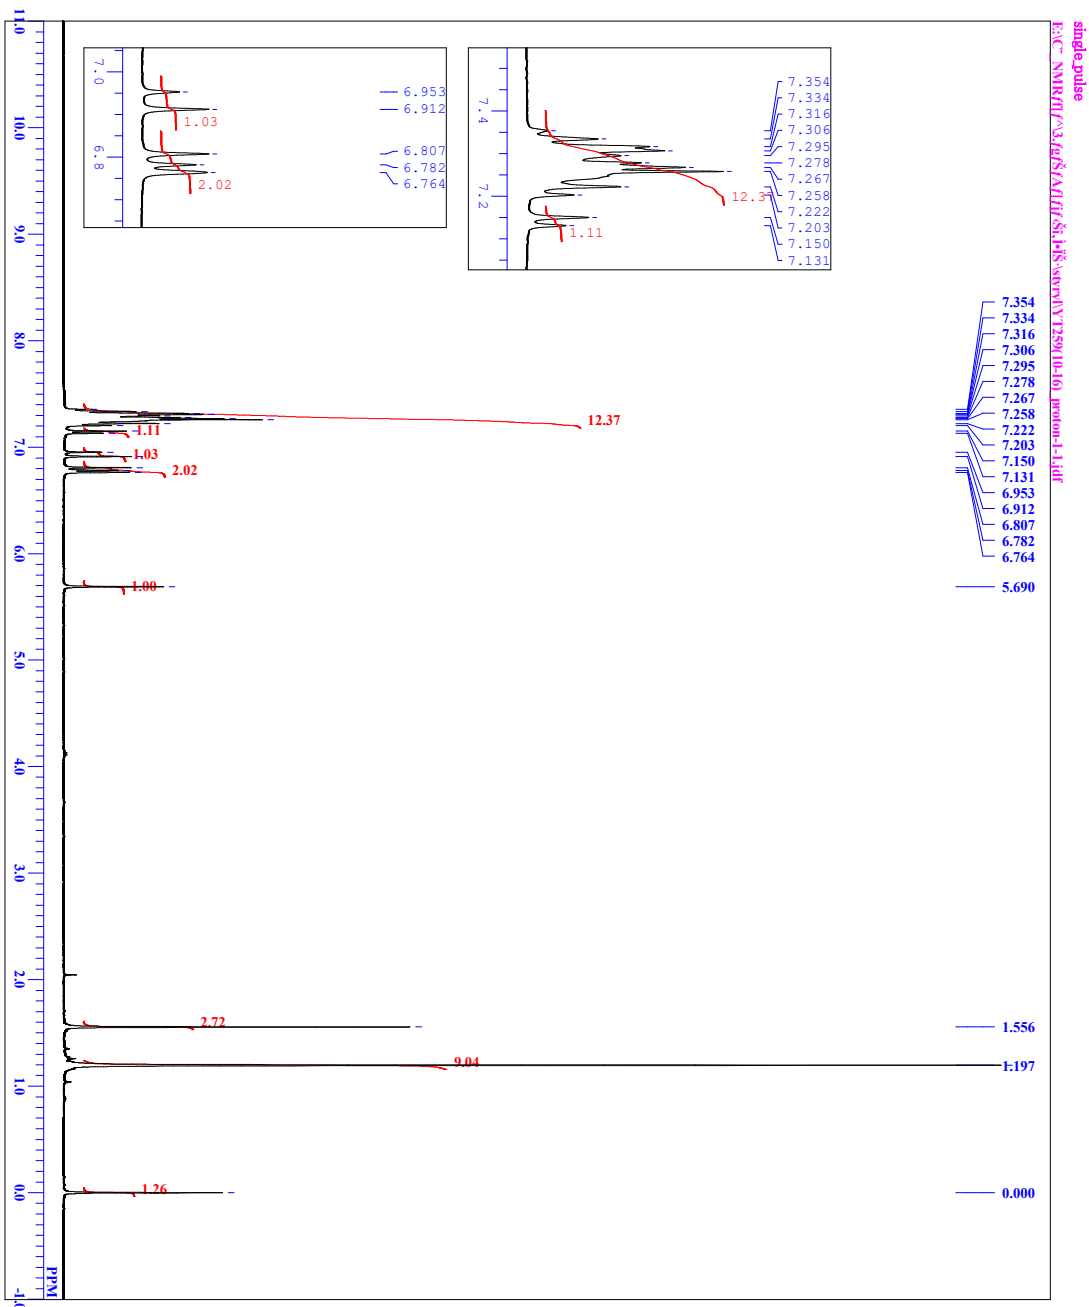

FILE V1729910.161.proton-1-1.d17  
 CONNT single\_pulse  
 DATIM 2022-07-07 19:10:38  
 EXNO1 1H  
 EXNO2 proton\_1xp  
 OBSFQ 399.38 MHz  
 OBSF1 441 KHz  
 OBSF2 1.61 Hz  
 POINT 40960  
 PREQU 7494.01 Hz  
 SCANS 32  
 ACOUM 5.4657 sec  
 PD 1.5343 sec  
 PW1 3.30 usec  
 IRNUC 1H  
 CTEMP 22.5 c  
 SLOTT CDCL3  
 SLVNT 0.00 ppm  
 EXREF 120 Hz  
 BF 56  
 RGAIN

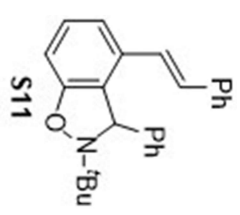

single pulse decoupled gated NOE

EXP: NMR012\_3\_415\A011218\_115\acq\115725910-10\_carbon01.f15

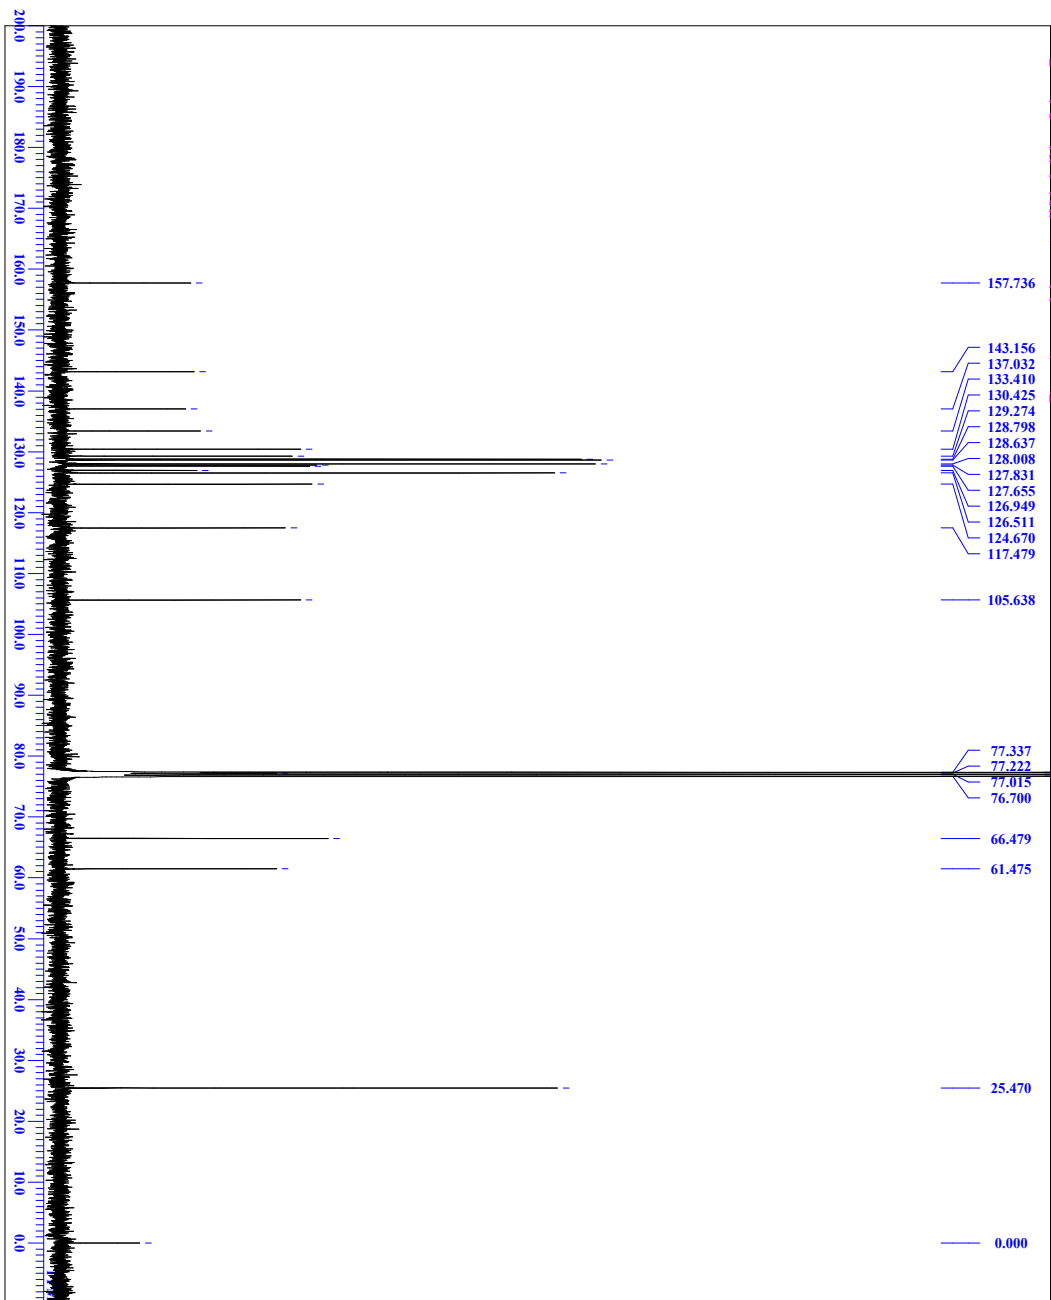

FILE: Y125910-10\_carbon01.f15  
 CONVNT single pulse decoupled gated NOE  
 D/ATM 202-07-07 19:15:01  
 ORNUC 13C  
 EXM0D carbon\_13p  
 OBSRO 100.43 MHz  
 OBSST 482 KHz  
 OBSFT 0.13 Hz  
 POINT 32768  
 FREQOU 25252.59 Hz  
 SC/ANS 5000  
 ACQTM 1.2976 sec  
 PD 1.7024 sec  
 PVI 3.75 usec  
 IRENUG 1H  
 CTEMP 22.1 c  
 SLENT CDCL3  
 EXREF 0.00 ppm  
 BP 1.20 Hz  
 RGAIN 56

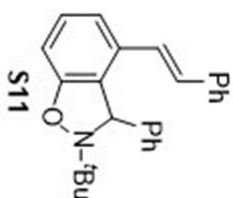

# 1-{2-Iodo-3-[(trimethylsilyl)ethynyl]phenyl}-3,3-diisopropyltriazen-1-ene (7a)

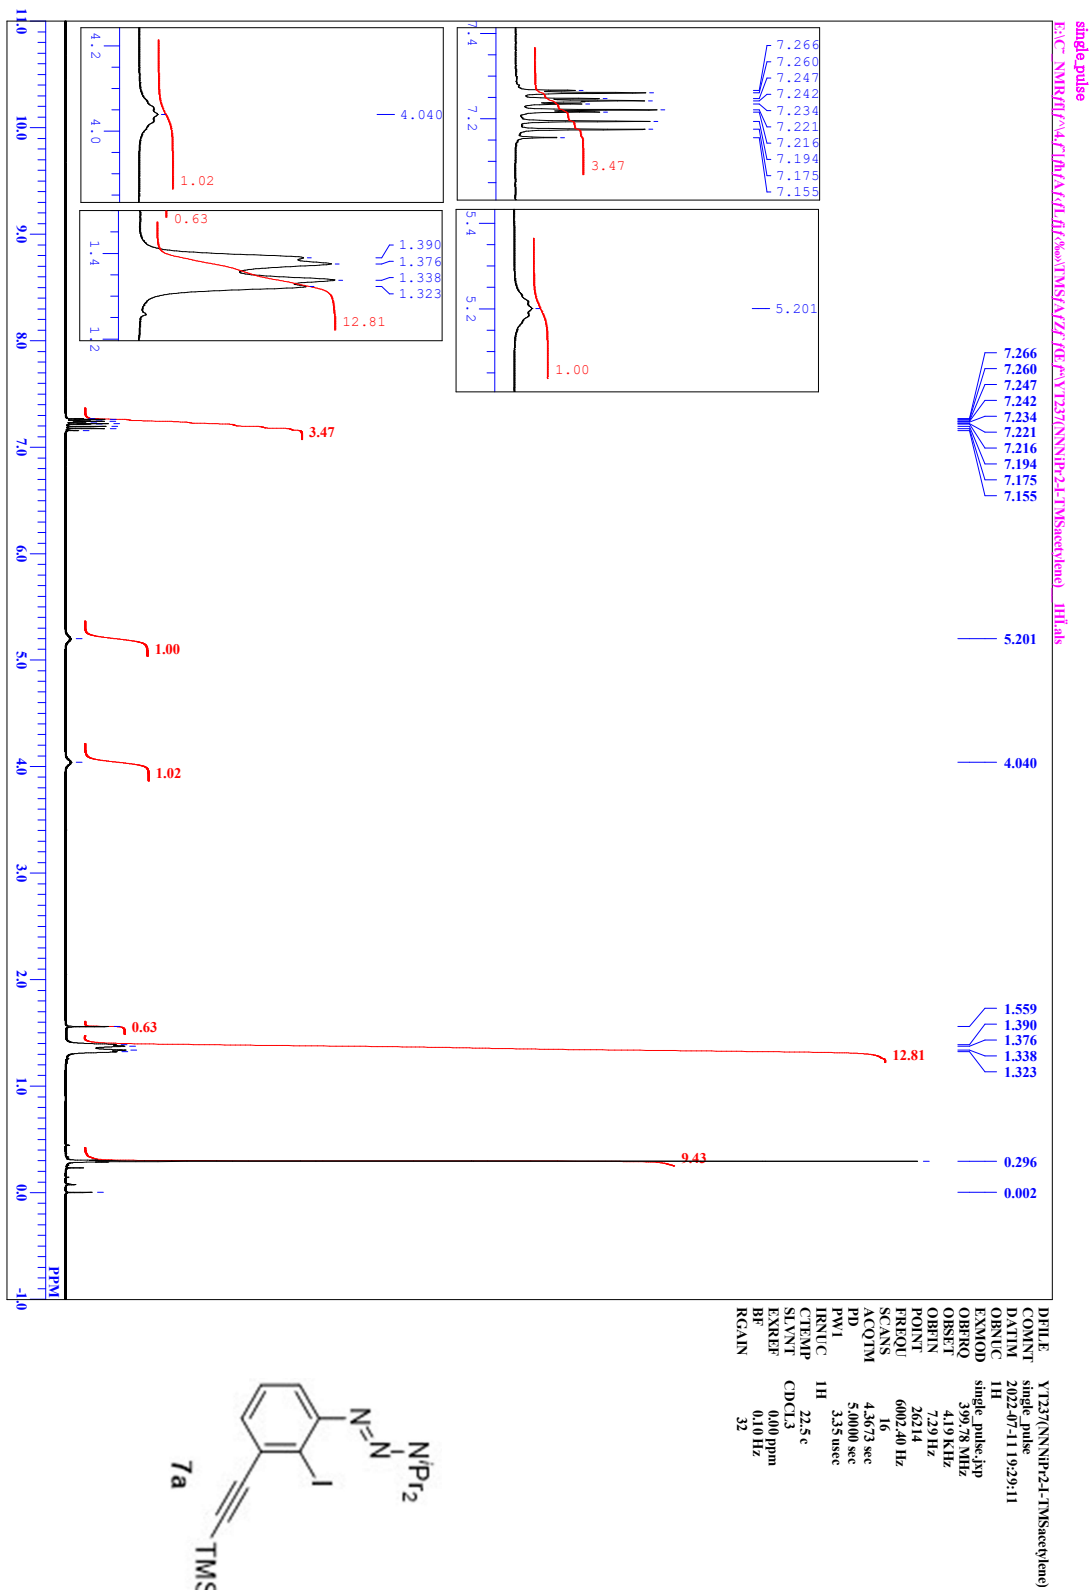

single pulse decoupled gated NOE

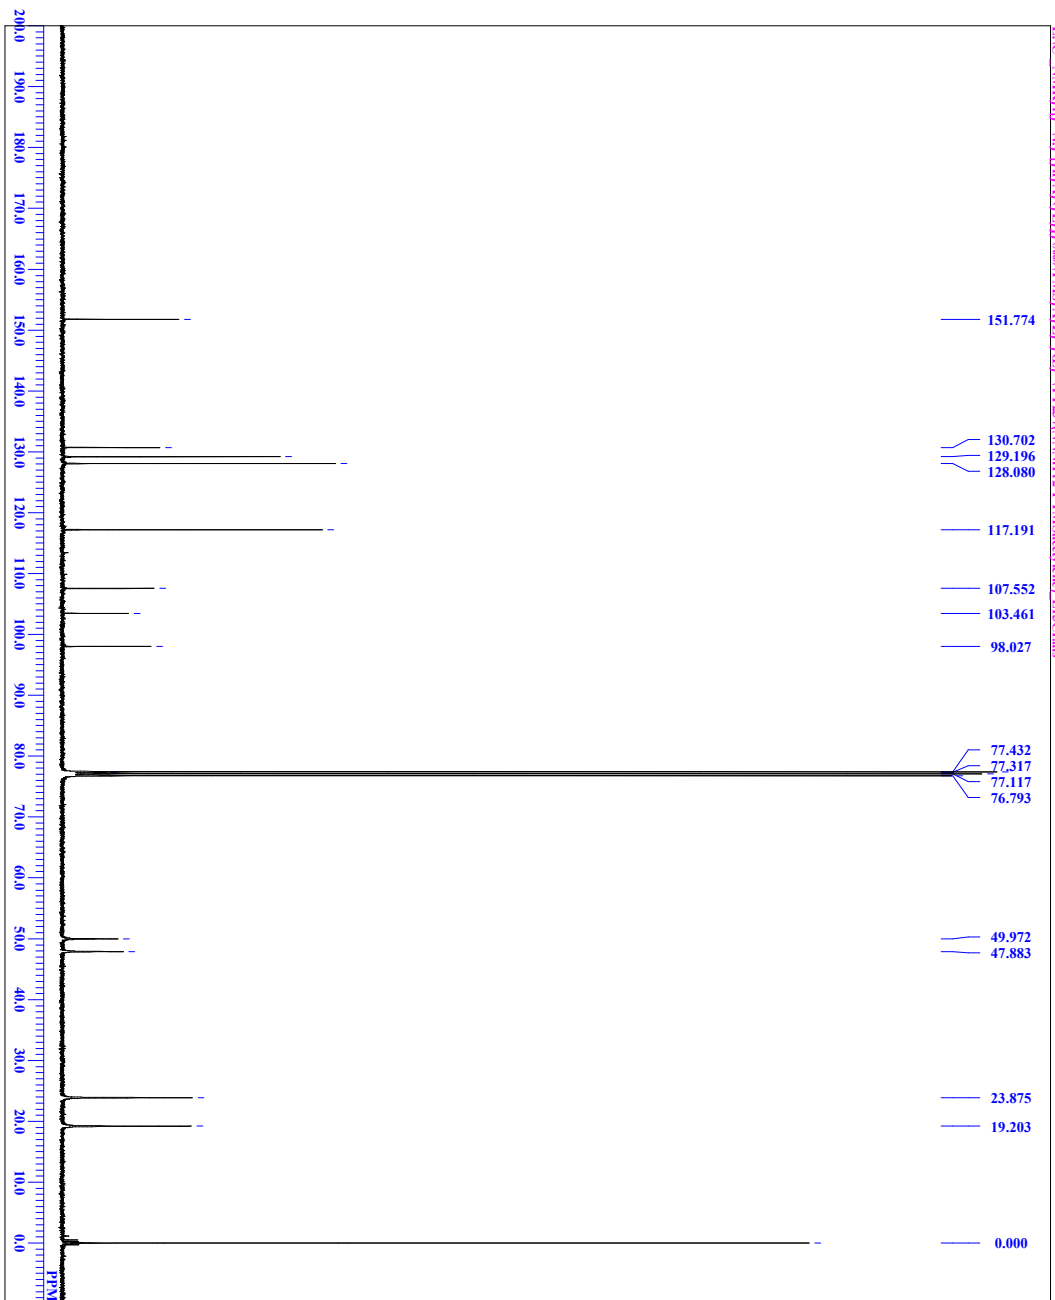

File: C:\NMR\01\2011\11\19\32\17\Y1237\N(N)NP2-1-TM(S)dec (one).H1A.C1A15

DATE: Y1237(N(N)NP2-1-TM(S)dec (one))  
 COMMENT: single pulse decoupled gated NOE  
 DATE\_1: 2012-07-11 19:32:17  
 INSTR: 13C  
 PULPROG: single\_pulse\_dec  
 EXMODO: 13C  
 OBSFREQ: 100.53 MHz  
 OBSRET: 5.35 KHz  
 ORBIN: 5.86 Hz  
 POINT1: 26214  
 FREQOU: 251256.9 Hz  
 SCANS: 6000  
 ACQTM: 1.0433 sec  
 PD: 2.0000 sec  
 P1: 3.60 usec  
 IRRUNG: 1H  
 CTEMP: 22.3 c  
 SLEWNT: CWCL3  
 EXREF: 0.00 ppm  
 BR: 1.20 Hz  
 RGAIN: 60

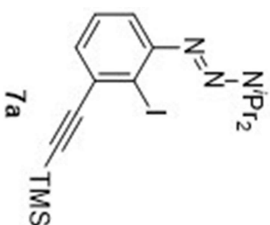



1-[2-Iodo-3-(phenylethynyl)phenyl]-3,3-diisopropyltriazen-1-ene (7b)

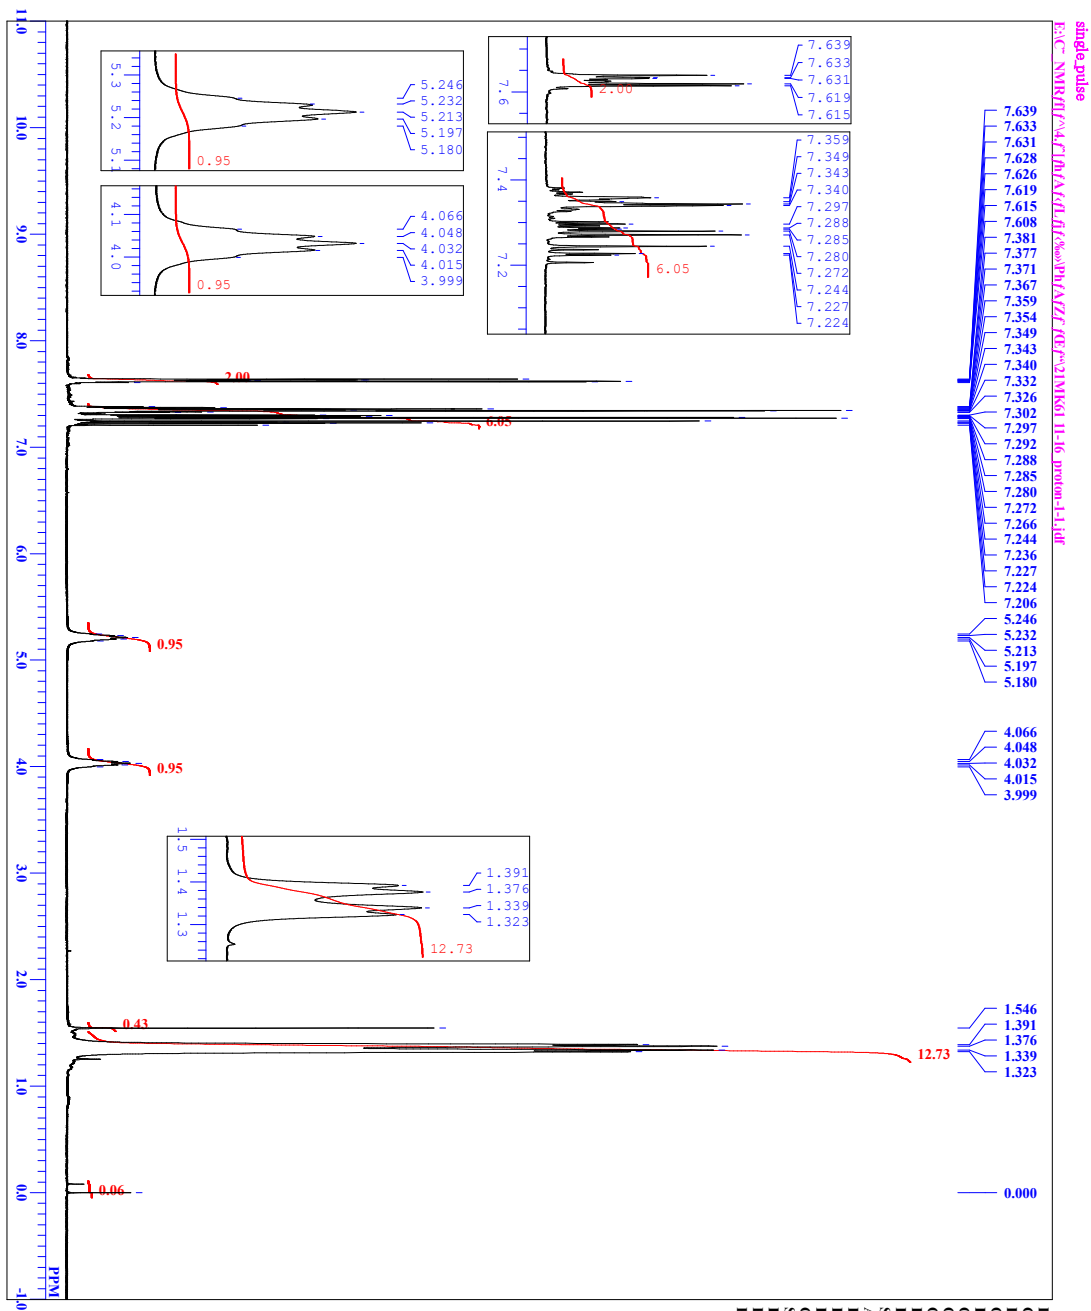

```

FILE 21MR6 11-16 proton-1-1.jf
NAME single_pulse
DATE 2022-07-04 13:48:31
PROB 1H
PROC1
PULPROG zgpg30
TD 65536
SOLVENT cdcl3
NS 2048
DS 4
SWH 1635.000 MHz
F2 101.625 MHz
AQ 0.370000 sec
RG 327.680
DE 1.000000
TE 300.2 K
D1 1.500000 sec
DELTA 0.000000 sec
CDCL3 0.000 ppm
EXREF 0.10 Hz
BF 36
RGAIN
  
```

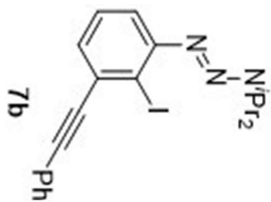

single pulse decoupled gated NOE

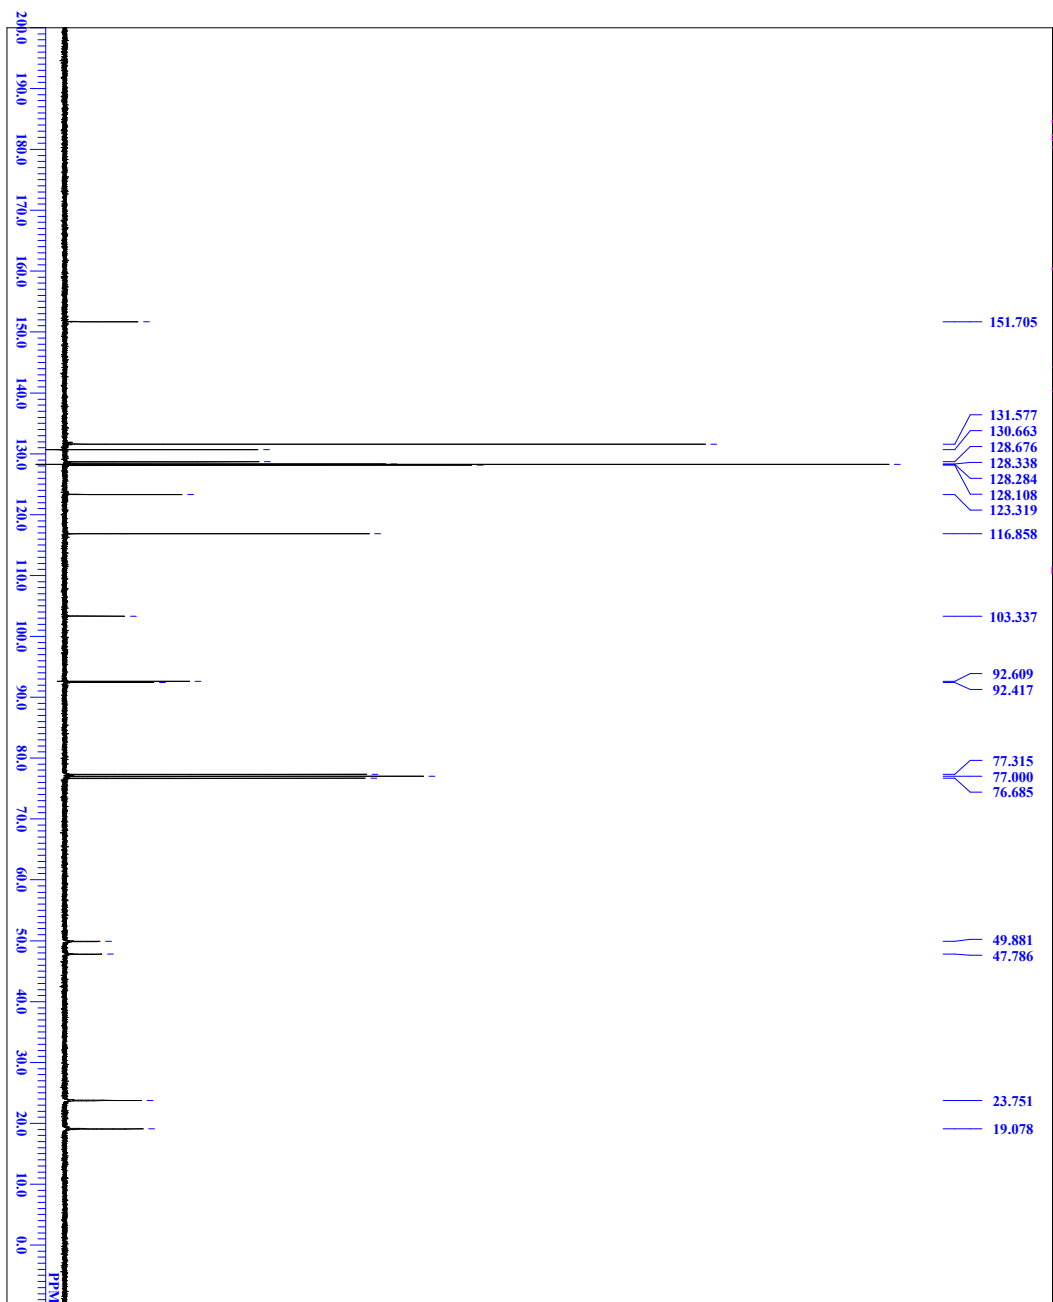

21MK61 11-16, carbon-1-11,als  
 single pulse decoupled gated NOE  
 202-07-04 13:55:46  
 CONT 21MK61 11-16, carbon-1-11,als  
 D/ATM 77.000  
 ORNUC 13C  
 EXM0D carbon\_1xp  
 ORPRO 100.43 MHz  
 OBSST 4.82 KHz  
 ORBIN 0.13 Hz  
 POINT 32768  
 FREQOU 25252.59 Hz  
 SC/ANS 1000  
 ACQTM 1000  
 PD 1.2976 sec  
 PVI 1.7024 sec  
 IRNTIC 3.75 usec  
 CTEMP 22.2 c  
 SLVNT CDCL3  
 EXREF 77.00 ppm  
 BP 0.10 Hz  
 RCGAIN 56

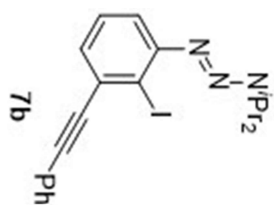

1-{3-[4-(*tert*-Butyldimethylsilyloxy)-but-1-yn-1-yl]-2-iodophenyl}-3,3-diisopropyltriazen-1-ene (7c)

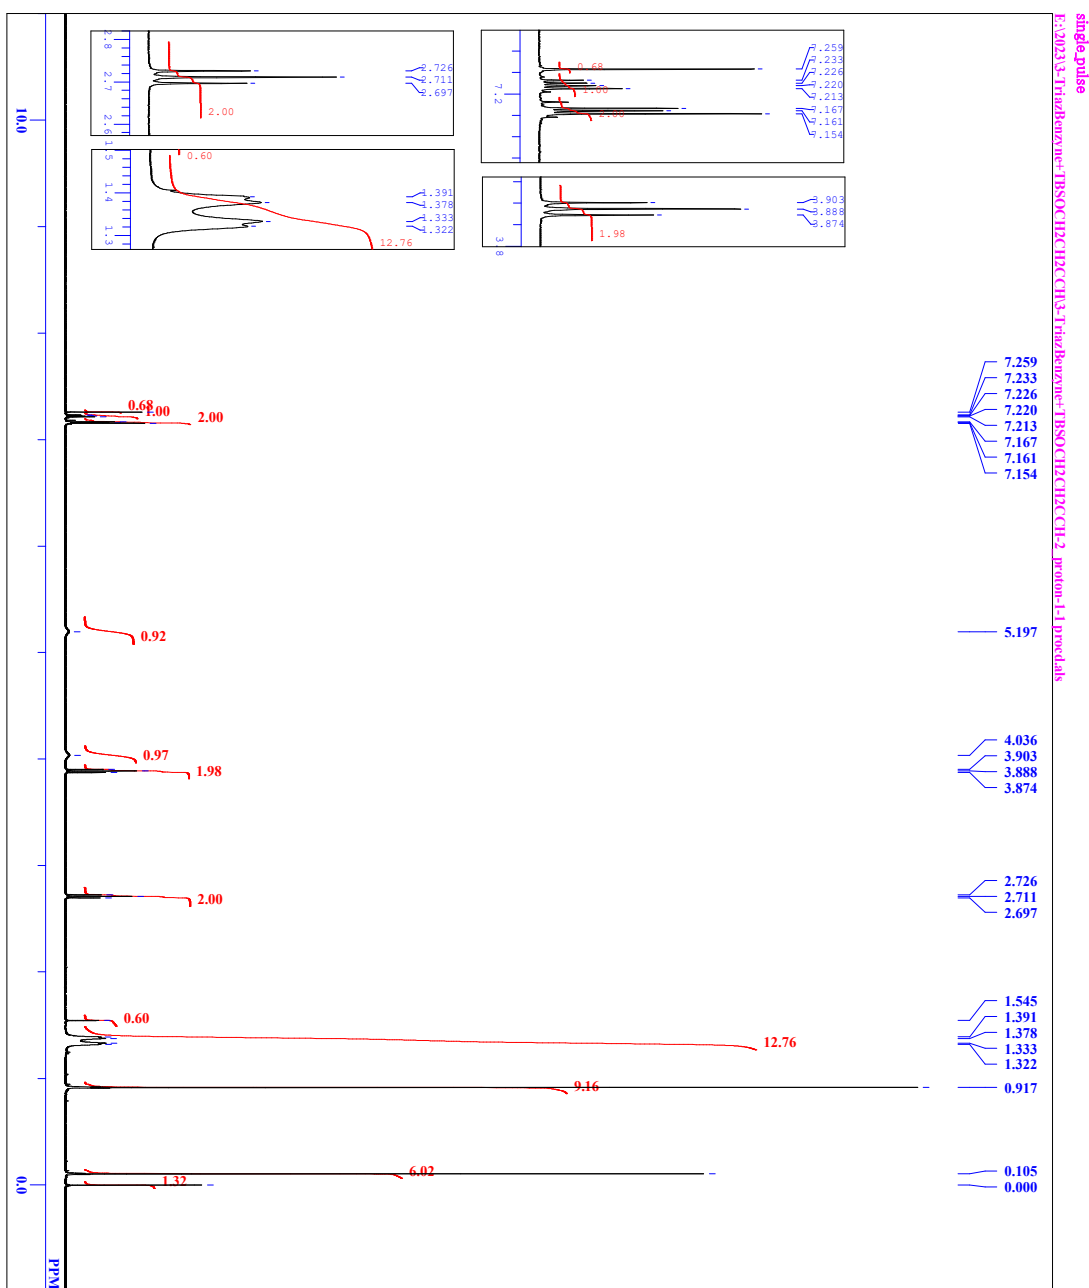

DP1E  
COM1 3-TriazBenzene+TBSOC\H2C\H2C\H2A  
DAT1M 2023-10-27 13:25:34  
EXM1D 1H  
OBS1T 1H  
P1 900.16 MHz  
FREQ1 241 KHz  
P1 6.01 Hz  
SOLVENT 20214  
SCANS 7507.51 Hz  
ACQ1M 8  
P1 3.4918 sec  
PR 5.0000 sec  
PVI 3.00 usec  
IRN1C 1H  
C1EMP 24.1 c  
S1V1T CDCl3  
EXREF 0.00 ppm  
BR 0.10 Hz  
RGAIN 46

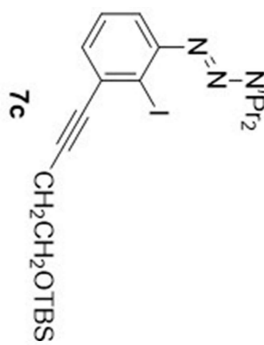

single pulse decoupled gated NOE

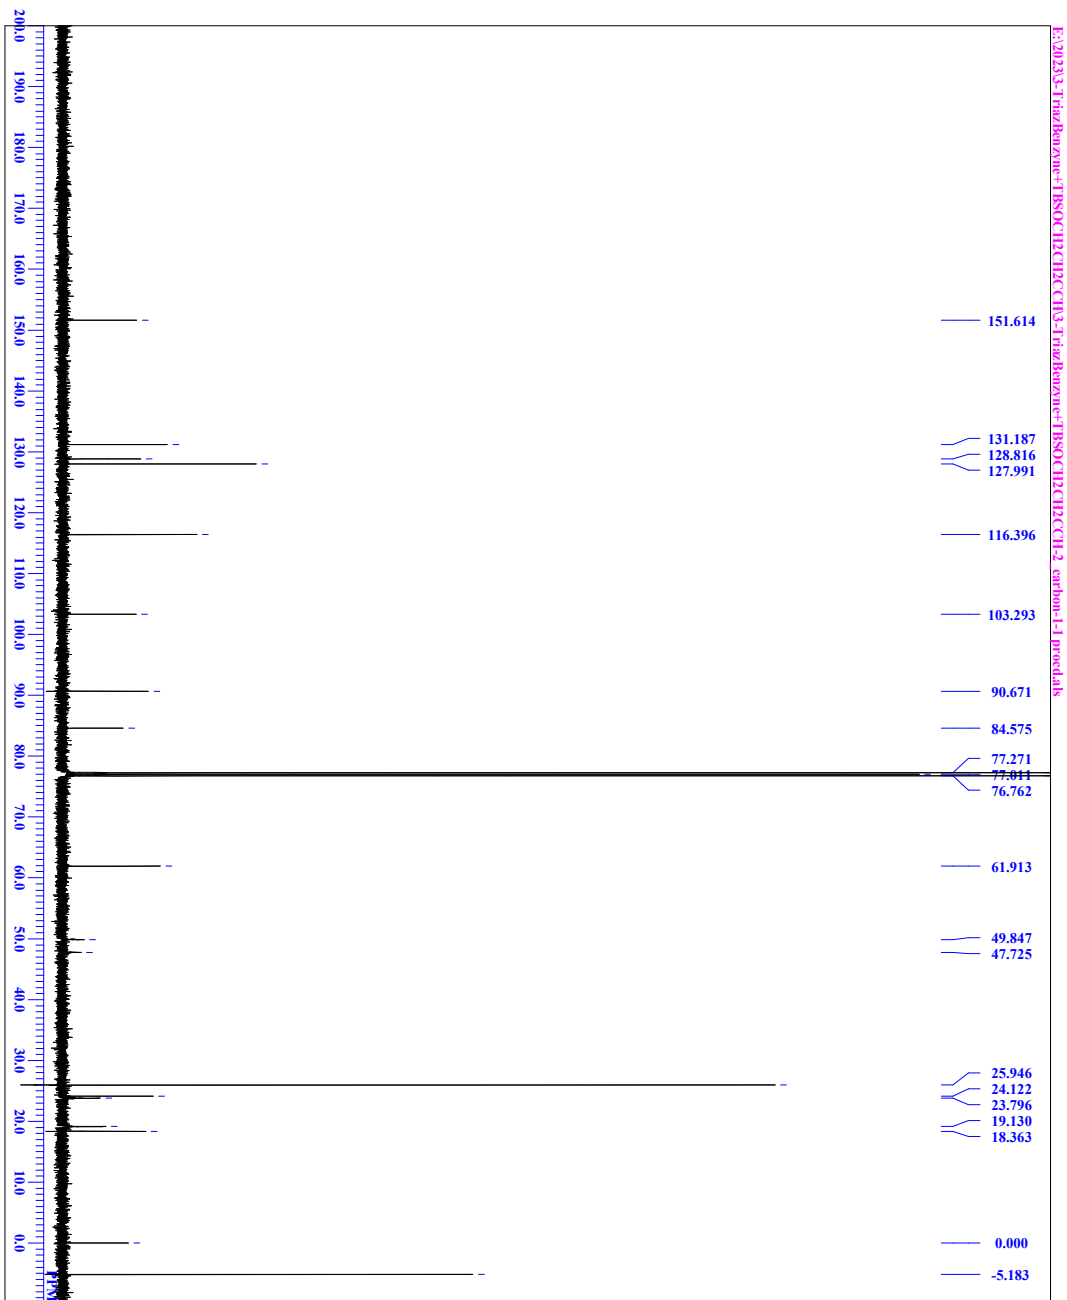

DP1.E  
 CONT 3-TriazBenzylne-TBSOCH2CH2X  
 DATE 2023-10-27 13:27:20  
 PROC single pulse decoupled gated NOE  
 IN 13C  
 EXM00 carbon13p  
 OBSF0 125.77 MHz  
 OBSF1 7.87 KHz  
 OBSF2 4.21 Hz  
 POINT 26214  
 FREQ0 3164557 Hz  
 SCANS 1024  
 ACQTM 0.8284 sec  
 PD 2.0000 sec  
 PVI 3.46 usec  
 IRENIG 1H  
 CTEMP 24.2 c  
 SLENT CDCl3  
 EXREF 0.00 ppm  
 BR 0.10 Hz  
 RGAIN 36

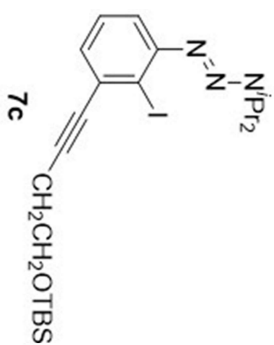

3,17-O-Bis(*tert*-butyldimethylsilyl)-17 $\alpha$ -[2-iodo-3-(3,3-diisopropyltriazen-1-en-1-yl)phenyl]ethynyl]estradiol (7d)

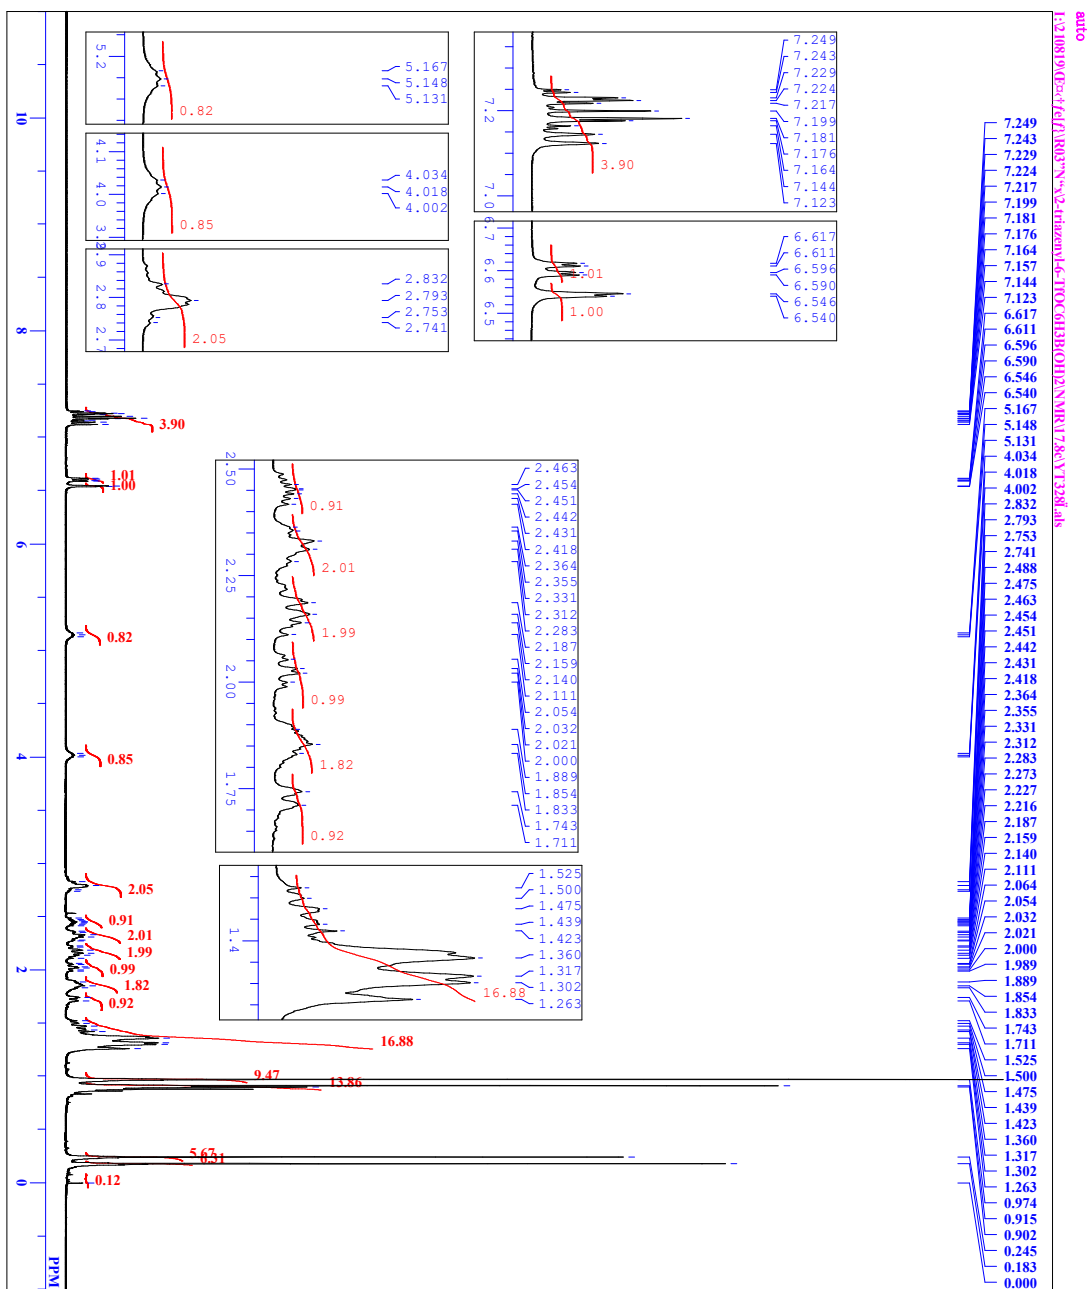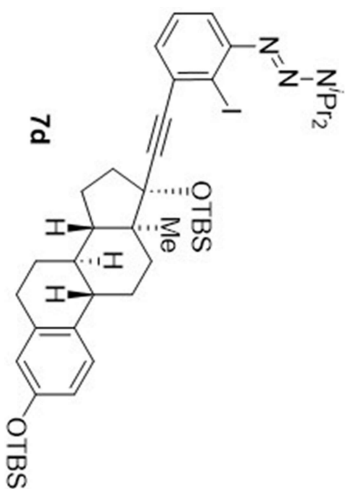

DP1E Y13281.sls  
 COMNT auto  
 DATIM Mon Oct 31 13:35:39 2022  
 OBTM 1H  
 EXMID NON  
 OBFRO 399.65 MHz  
 OBSRT 124.00 KHz  
 OBFIN 16500.00 Hz  
 POINT 32768  
 FREQU 7992.01 Hz  
 SCANS 16  
 ACQTM 4.1001 sec  
 PD 4.9500 sec  
 PVI 6.20 msec  
 IRNIC 1H  
 CTEMP 22.6 c  
 S1VMT CDCl3  
 EXREF 0.00 ppm  
 BR 0.10 Hz  
 RCALN 8

single pulse decoupled gated NOE

EX-C NMR.DI.C4.D10A16.D172805.KS.C.DIC.GI.NC.D06.VI.DI.ETBS05.VI.T33310-19).E13C1.ash

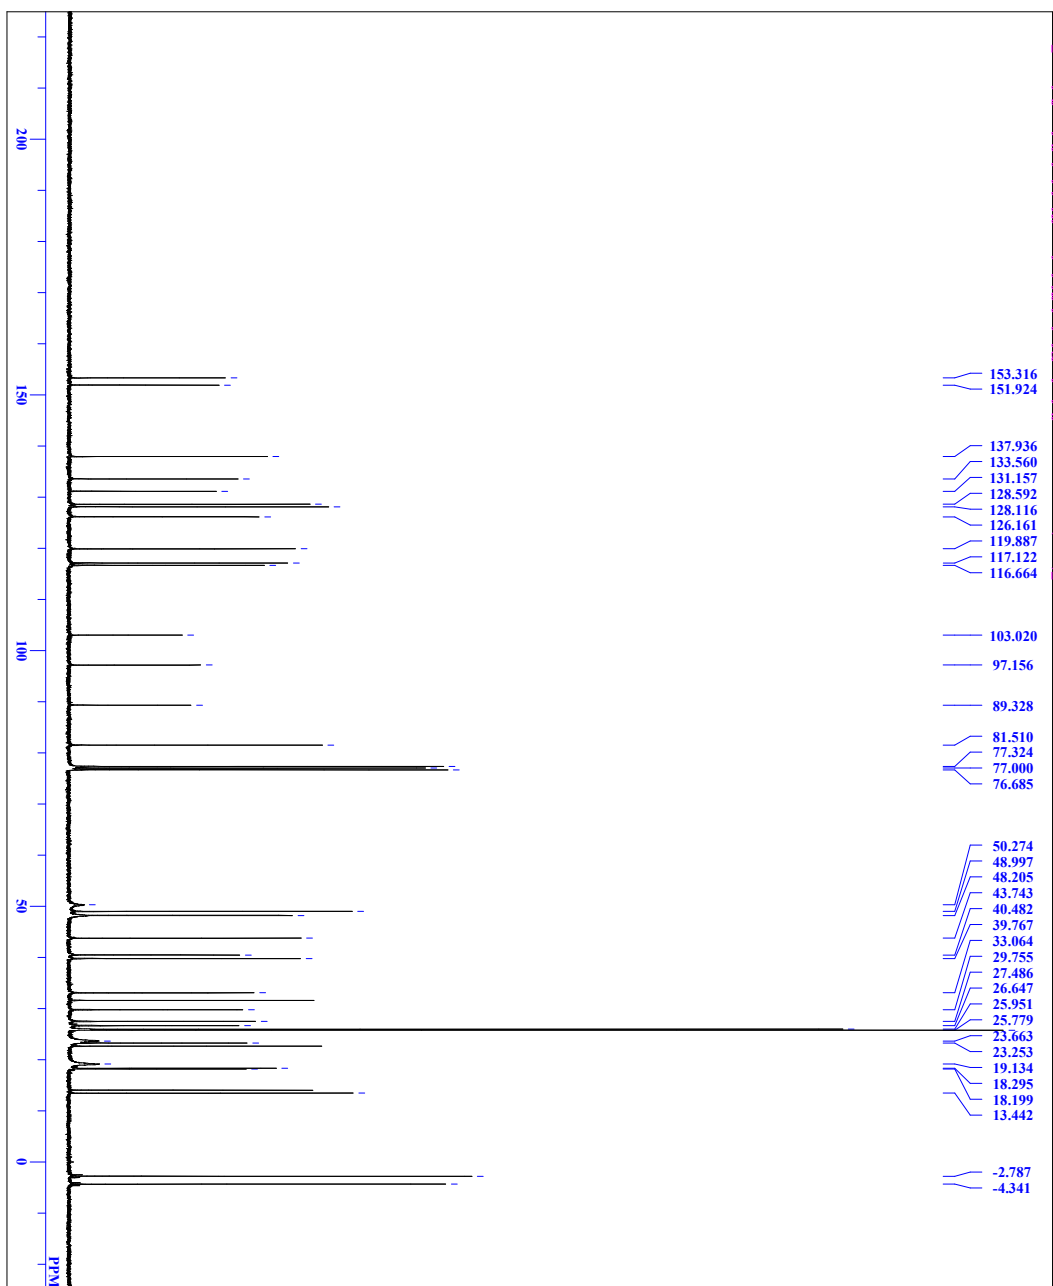

D1.E: Y133310-19).E13C1.ash  
 CONT single pulse decoupled gated NOE  
 DATE 202-11-04 11:30:12  
 ORNUC 13C  
 EXMOD single\_pulse\_dec  
 OBSRO 100.53 MHz  
 OBSRT 5.35 KHz  
 OBSFN 5.86 Hz  
 POINT 26214  
 FREQOU 251256.9 Hz  
 SCANS 2400  
 ACQTM 1.0433 sec  
 PD 2.0000 sec  
 PVI 3.60 usec  
 IRNUC 1H  
 CTEMP 50.0 c  
 SLEVP CDCL3  
 EXREF 77.00 ppm  
 BP 1.20 Hz  
 RGAIN 60

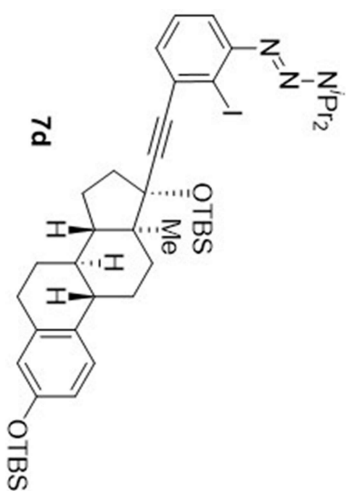

# 1-[2-Iodo-3-(6-phenylhexa-1,3-diyne-1-y)phenyl]-3,3-diisopropyltriaz-1-ene (7e)

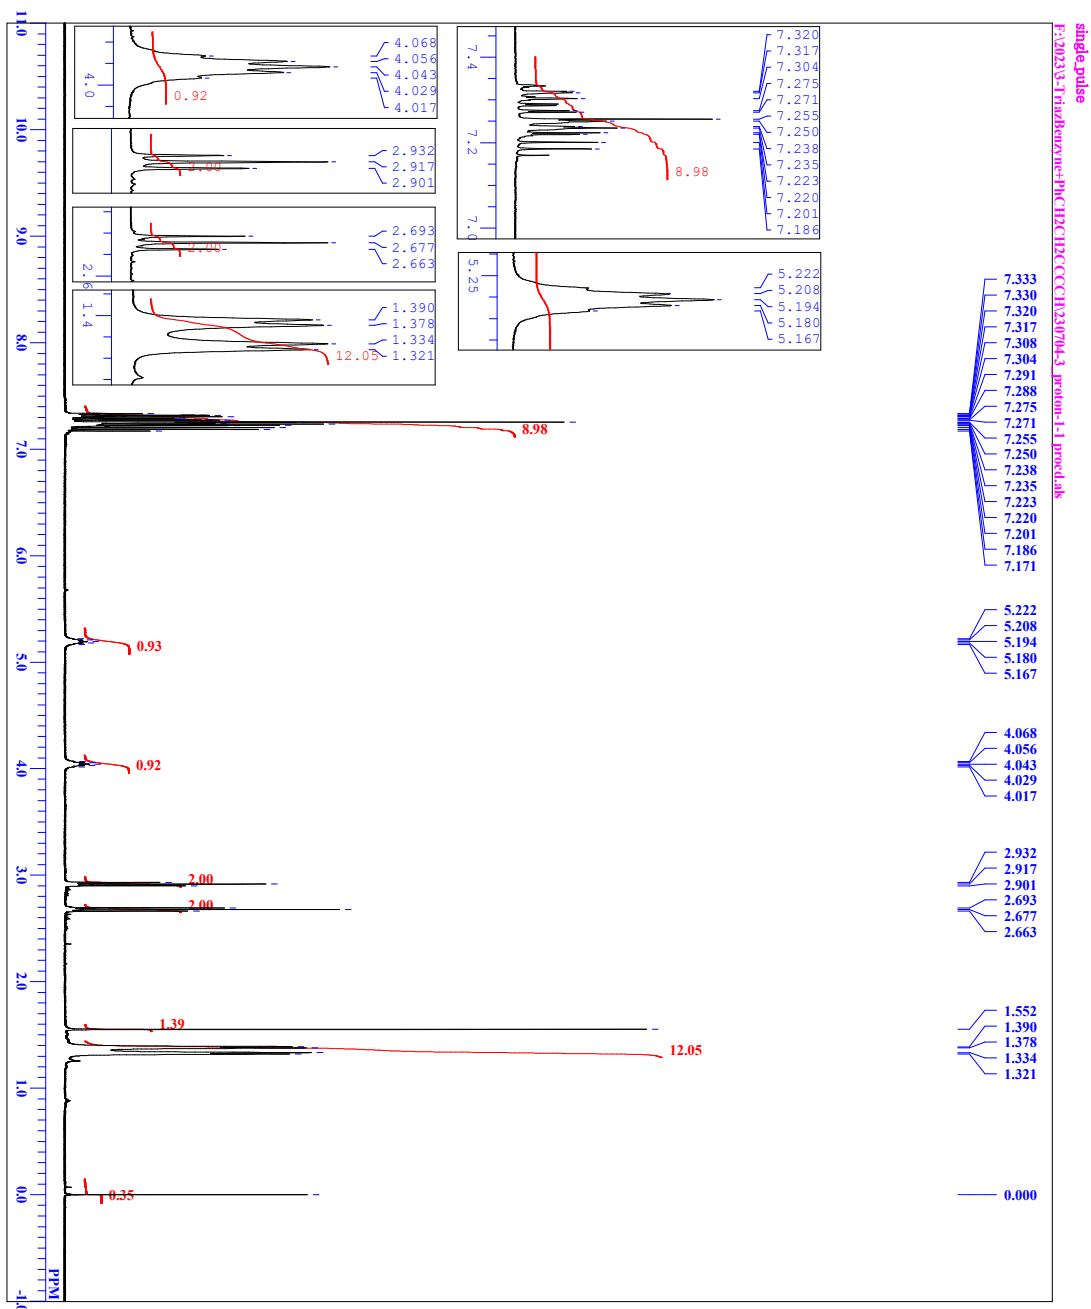

FILE 230704-3-proton-1-1-procd.ms  
 CONTIN single\_pulse  
 DATIM 2023/07/04 17:11:48  
 OBNUC 1H  
 EXMID proton\_1xp  
 OBRQ 500.16 MHz  
 OBSF1 2.41 KHz  
 OBRN 6.01 Hz  
 POINT 26214  
 PRQ 7507.51 Hz  
 SCANS 8  
 ACDTM 3.4918 sec  
 PD 5.0000 sec  
 PWT 3.00 usec  
 IRNUC 1H  
 CTEMP 23.9 c  
 CDCL3 CDCL3  
 SLVNT 0.00 ppm  
 EXREF 0.10 Hz  
 BF 56  
 RGAIN 56

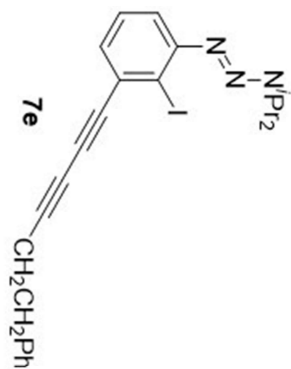

single pulse decoupled gated NOE

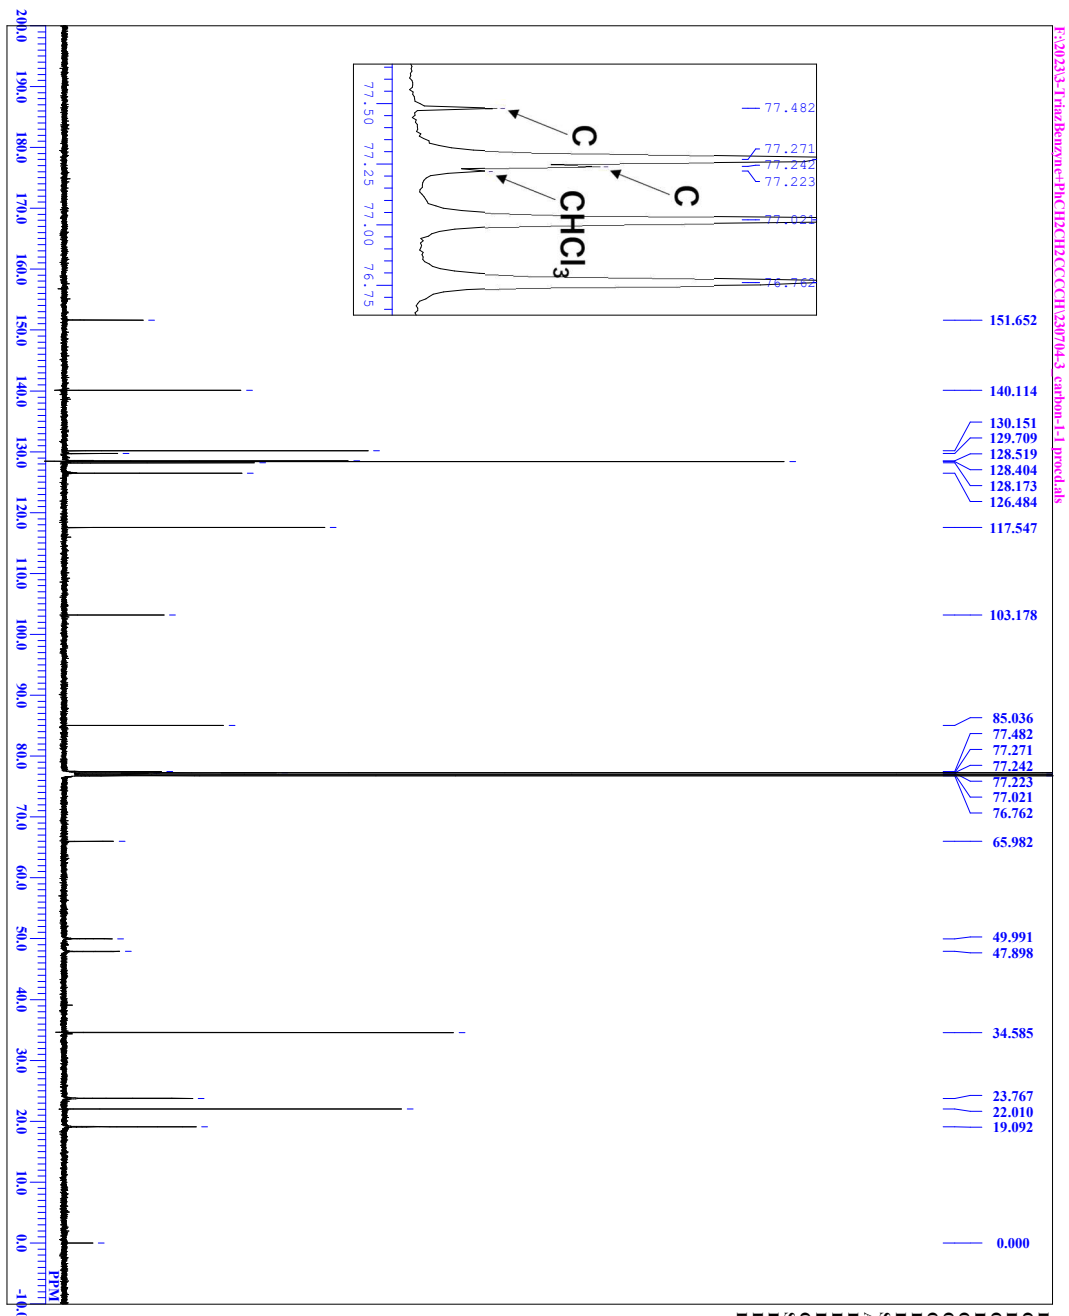

230714-3\_carbon-1-1\_procd.as  
 single pulse decoupled gated NOE  
 DATE\_ 2023-07-04 17:16:57  
 CONV\_T 13C  
 D1\_ATM 202.340704  
 ORNUC 13C  
 EXM0D carbon13p  
 ORPRO 125.77 MHz  
 OBSF1 7.87 KHz  
 OBSF2 4.21 Hz  
 ORBIN 26214  
 POINT 3168457 Hz  
 FREQOU 12000  
 SCANS 0.8284 sec  
 ACQTM 2.0000 sec  
 PD 3.46 usec  
 PVI  
 IRENUG 1H  
 CTEMP 23.6 c  
 SLENT CDCL3  
 EXREF 0.00 ppm  
 BP 0.10 Hz  
 RGAIN 36

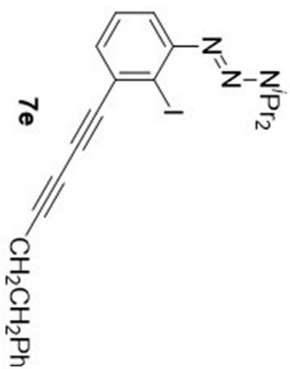



[(3,3-Diisopropyltriaz-1-en-1-yl)-6-ethynylphenyl]boronic acid (2a')

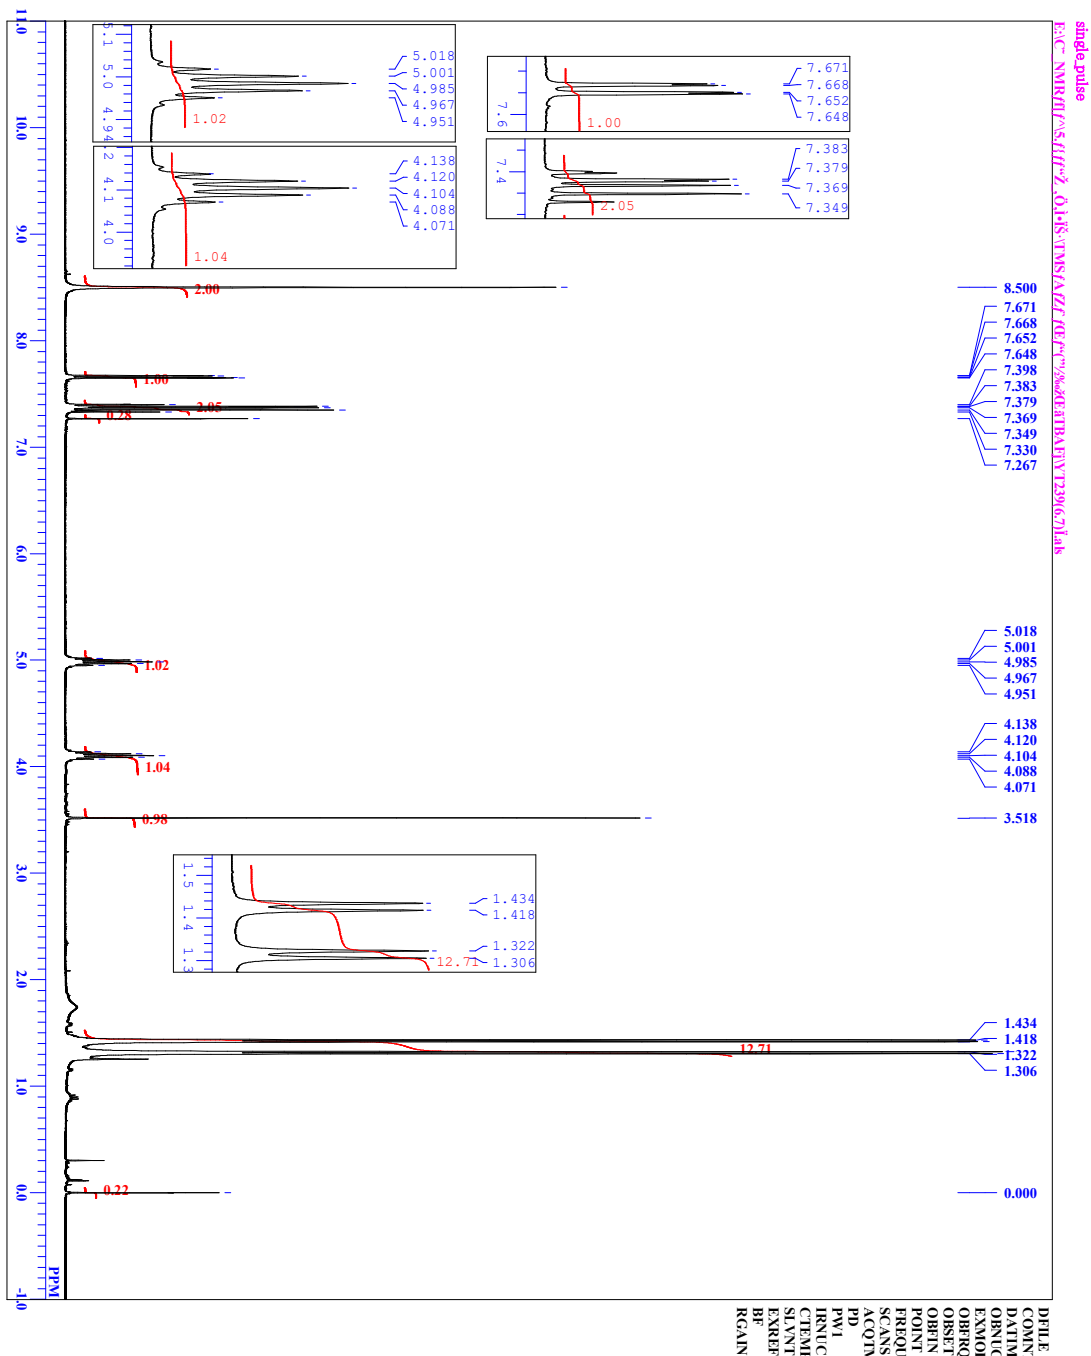

FILE: Y17239(6-7).hls  
 CONIN: single\_pulse  
 DATIM: 2022-06-02 18:33:51  
 OBNUC: <sup>1</sup>H  
 EXMUD: single\_pulse.fxp  
 OBRQ: 399.78 MHz  
 OBSF1: 4.19 KHz  
 OBRN: 7.29 Hz  
 POINT: 26214  
 PRQ: 6002.40 Hz  
 SCANS: 16  
 ACOIM: 4.5673 sec  
 PD: 5.0000 sec  
 PW1: 3.35 usec  
 IRNUC: <sup>1</sup>H  
 CTEMP: 21.1 c  
 SIVNT: CDCL<sub>3</sub>  
 EXREF: 0.00 ppm  
 BF: 0.10 Hz  
 RGAIN: 36

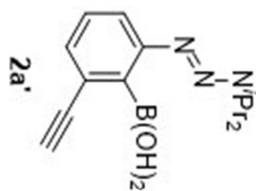

single pulse decoupled gated NOE

Ex-C: NMR/DIR/S/411-2\_013/SYMS/AZL/EP/100%KBrATBA/VI7239(6-7)\_carbon1.als

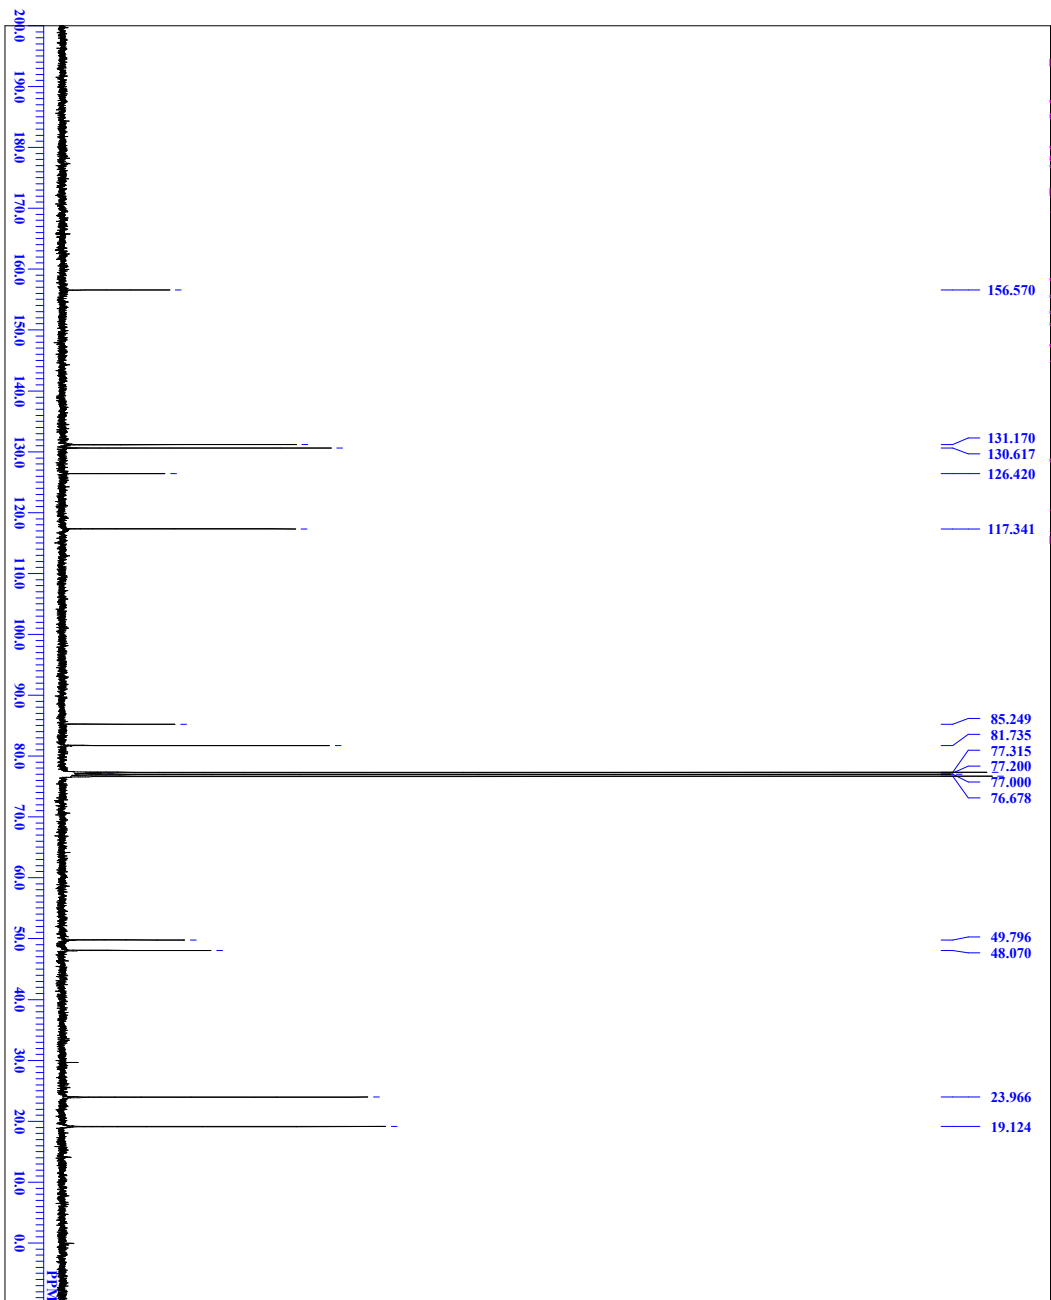

DTITLE: Y7239(6-7)\_carbon1.als  
 CONT: single pulse decoupled gated NOE  
 DATE: 202-06-03 11:55:28  
 ORNUC: 13C  
 EXMOR: carbon1xp  
 OBSFQ: 100.43 MHz  
 OBSF: 482 KHz  
 OBSST: 0.13 Hz  
 POINT: 32/68  
 FREQOU: 25252.59 Hz  
 SCANS: 1000  
 ACQTM: 1.2976 sec  
 PD: 1.7024 sec  
 PVI: 3.75 usec  
 IRNUC: 1H  
 CTEMP: 22.6 c  
 SLENT: CDCL3  
 EXREF: 77.00 ppm  
 BR: 1.20 Hz  
 RCYCL: 56

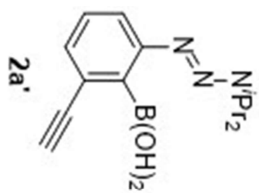

[2-(3,3-Diisopropyltriaz-1-en-1-yl)-6-(phenylethynyl)phenyl]boronic acid (2b)

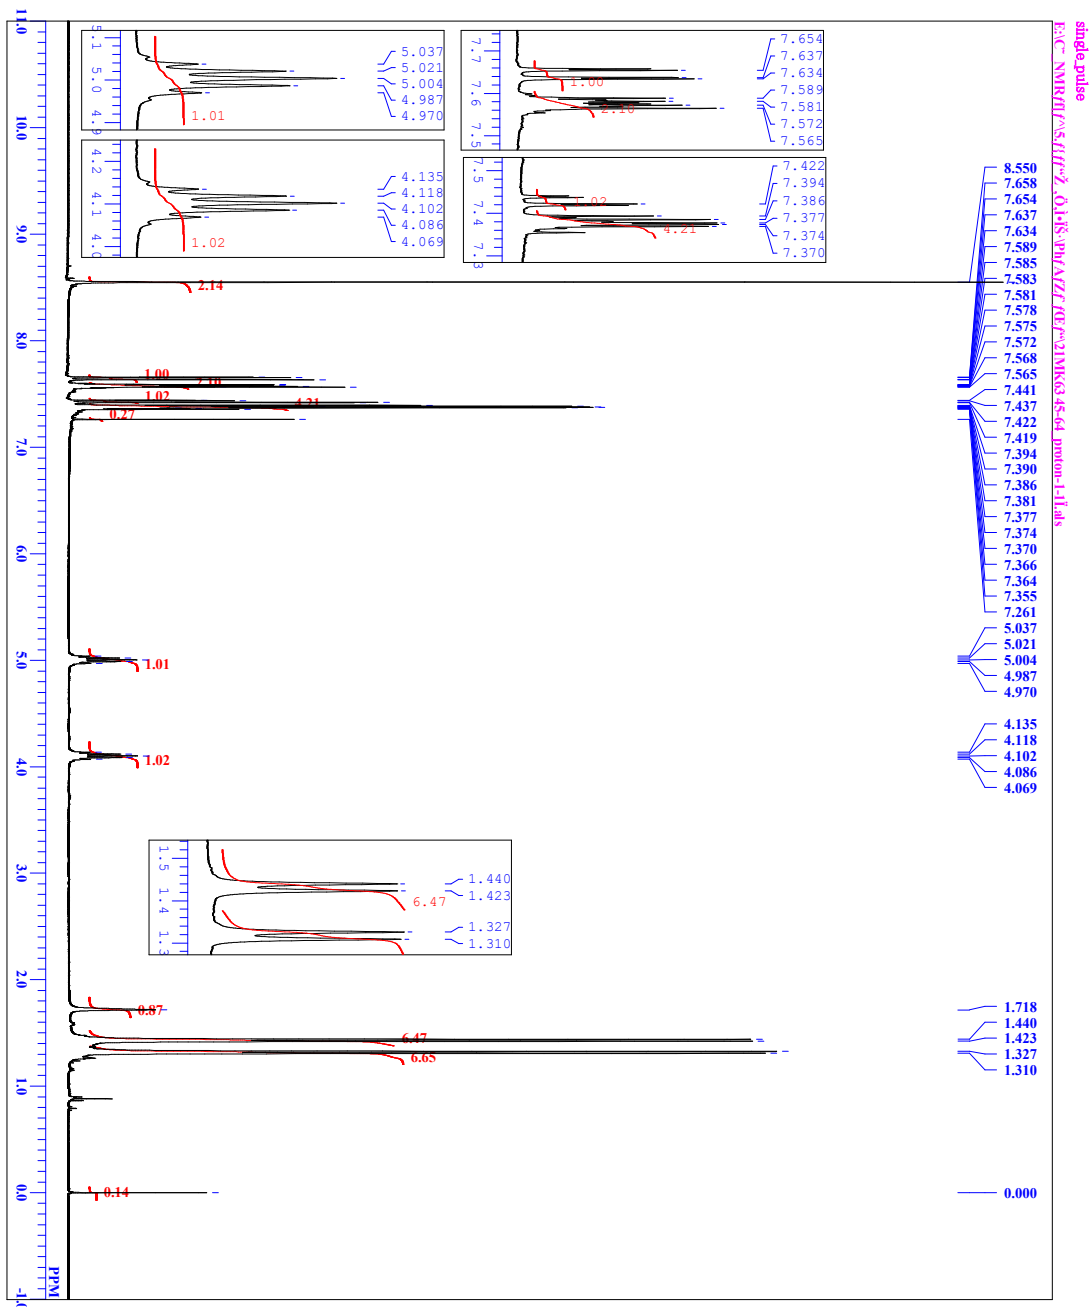

single pulse  
 $^1\text{H}$  NMR (CDCl<sub>3</sub>)  $\delta$  8.550, 7.658, 7.654, 7.637, 7.634, 7.637, 7.589, 7.581, 7.572, 7.565, 7.422, 7.394, 7.386, 7.377, 7.374, 7.370, 7.366, 7.364, 7.355, 7.261, 5.037, 5.021, 5.004, 4.987, 4.970, 4.135, 4.118, 4.102, 4.086, 4.069, 1.718, 1.440, 1.423, 1.327, 1.310, 0.000

FILE 21MK63 45-64.prmton-1-11.ms  
 CONIN single\_pulse  
 DATIM 2022-07-15 13:24:43  
 OBNUC  $^1\text{H}$   
 EXMID proton\_kp  
 OBRQ 399.38 MHz  
 ORES1 4.41 KHz  
 ORES2 1.61 Hz  
 POINT 32768  
 FREQ 5995.20 Hz  
 SCANS 16  
 ACOIM 5.4657 sec  
 PD 1.5343 sec  
 PW1 3.30 usec  
 IRNUC  $^1\text{H}$   
 CTEMP 22.5 c  
 CDCL3 CDCL3  
 SLVNT 0.00 ppm  
 EXREF 0.10 Hz  
 BF 46  
 RGAIN

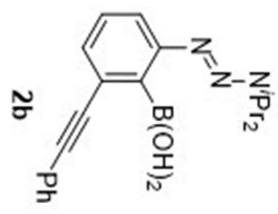

single pulse decoupled gated NOE

EX-C: NMR/01/05\_4117-2\_011818/01/05\_4117-2\_011818

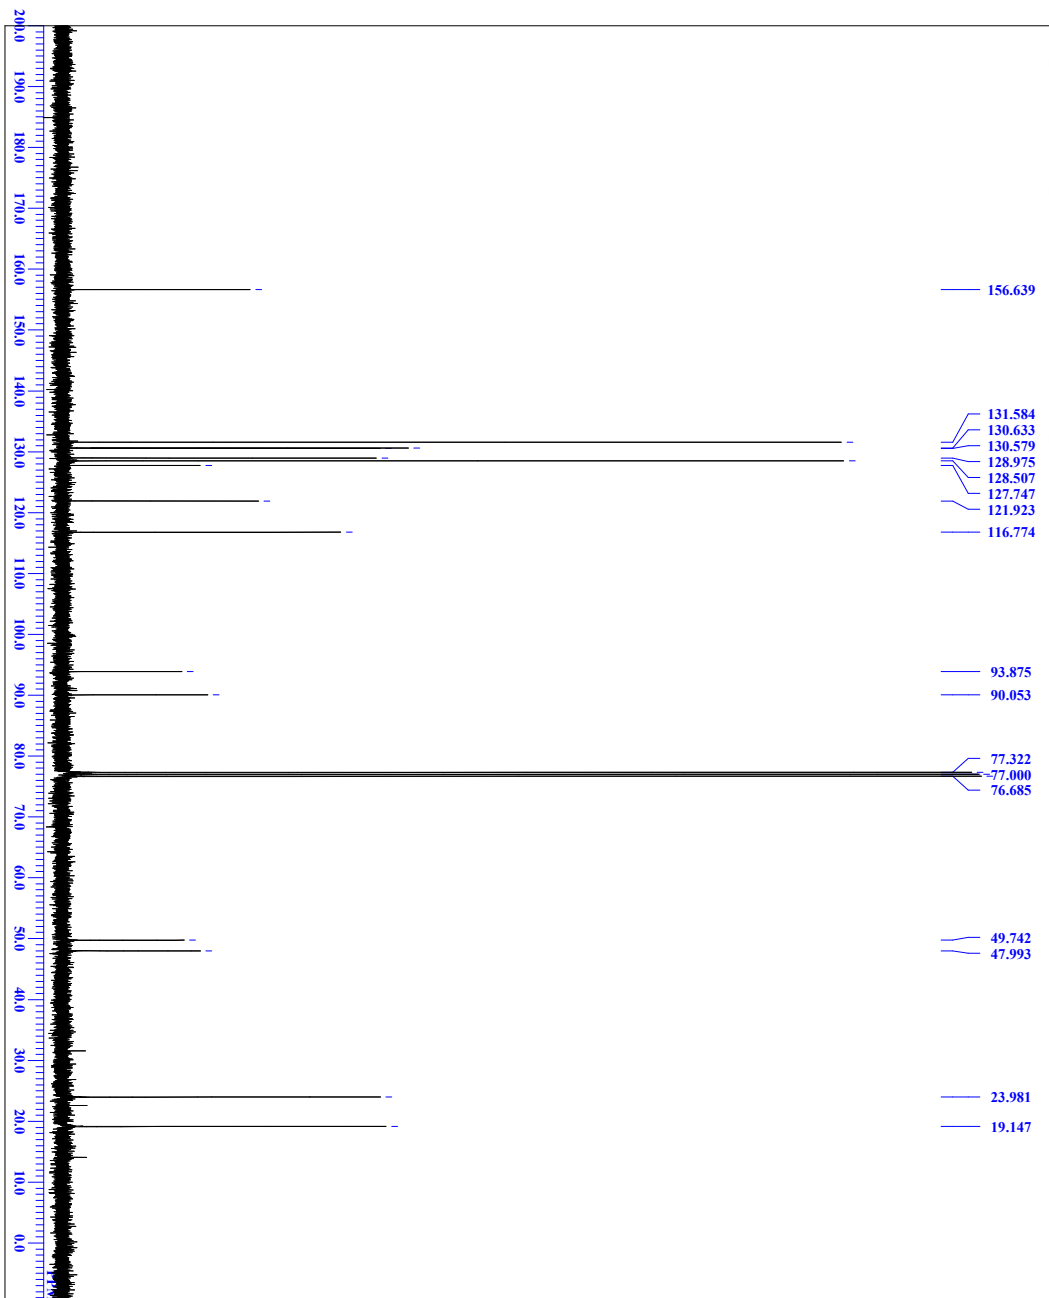

21MK63 45-64 carbon-1-11.als  
 single pulse decoupled gated NOE  
 DATE\_: 2022-07-15 13:48:14  
 CONT: 13C  
 D/ATM: carbon\_1xp  
 EXM/OD: 100.43 MHz  
 OBS/RO: 482 KHz  
 OBS/ET: 0.13 Hz  
 POINT: 32768  
 FREQ/OU: 25252.59 Hz  
 SC/ANS: 1000  
 ACQ/TM: 1.2976 sec  
 PD: 1.7024 sec  
 PVI: 3.75 usec  
 IREN/IG: 1H  
 CTEM/P: 22.5 e  
 SLV/NT: CDCl3  
 EXREF: 77.00 ppm  
 BP: 0.10 Hz  
 RGAIN: 56

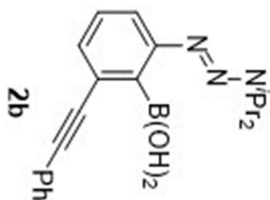



single pulse decoupled gated NOE

EXPT: NMR1D12.S, F1F2: 0118, G1/G2/G3/G4/G5: DV/DV/AV/T3S4, E1AC1.415

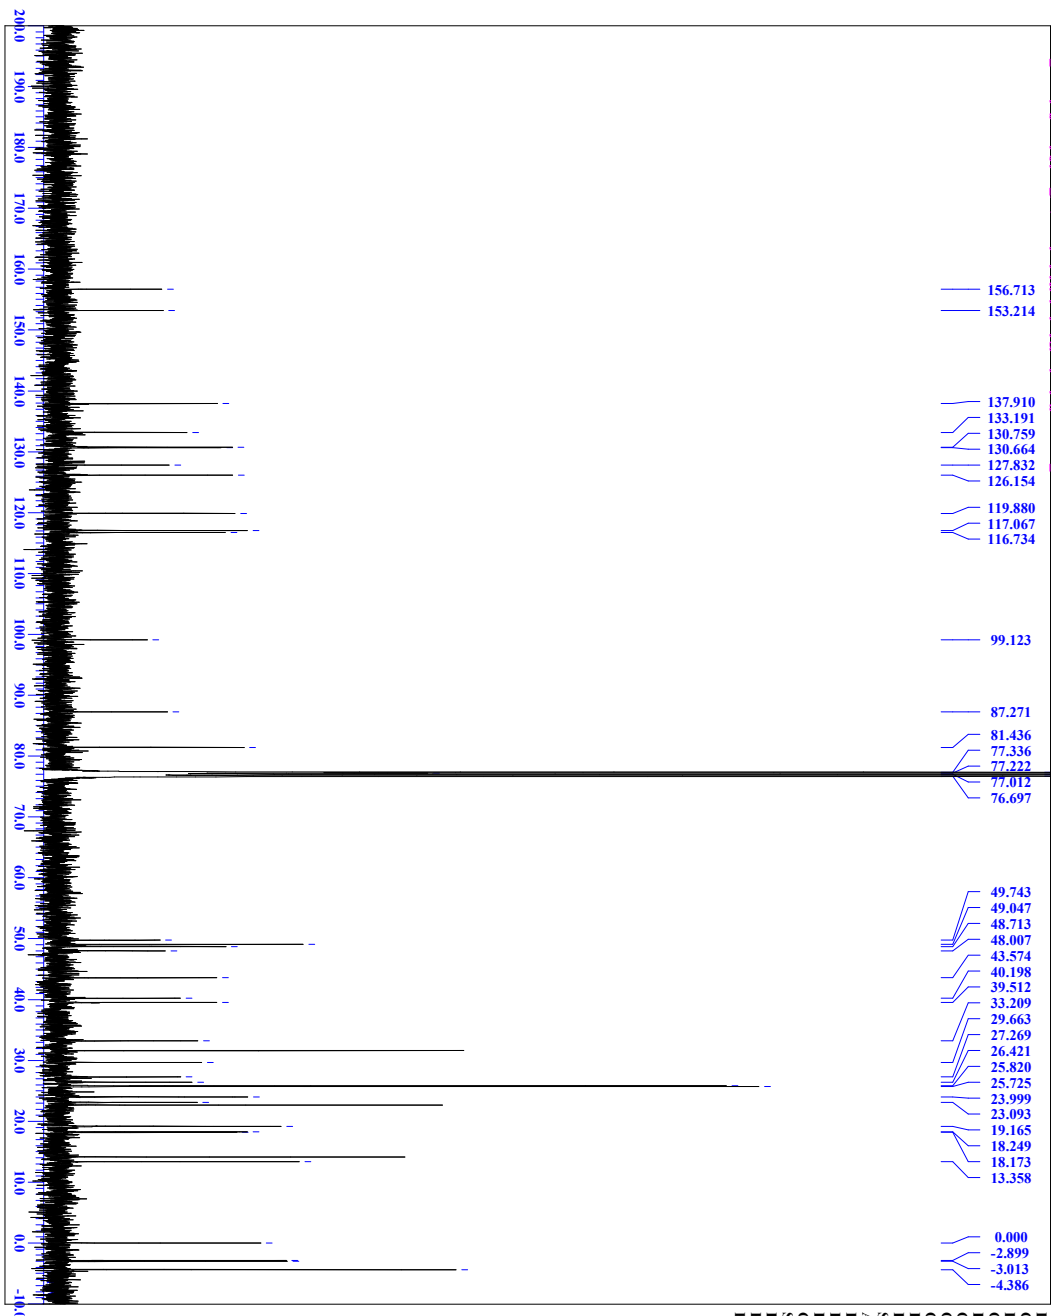

D1LE: Y1354, E1AC1.415  
 CONT: single pulse decoupled gated NOE  
 D1ATM: 2023-01-12 18:58:32  
 ORNUC: 13C  
 EXM1OD: single\_pulse\_dec  
 OBRRO: 100.53 MHz  
 OBSST: 5.35 KHz  
 OBRFN: 5.86 Hz  
 POINT: 26214  
 FREQOU: 251256.9 Hz  
 SCANS: 6000  
 ACQTM: 1.0433 sec  
 PD: 2.0000 sec  
 PVI: 3.60 usec  
 IRNUC: 1H  
 CTEMP: 22.4 c  
 SLENT: CDCL3  
 EXREF: 0.00 ppm  
 BP: 1.20 Hz  
 RCYCLE: 60

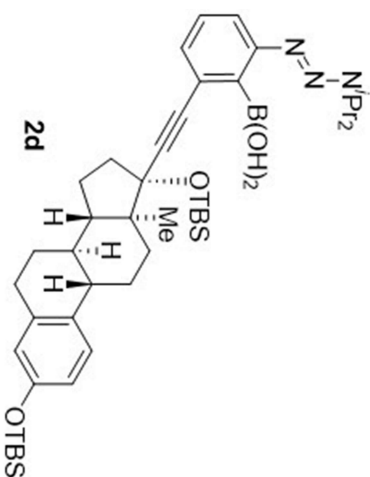

[2-(3,3-Diisopropyltriaz-1-en-1-yl)-6-(6-phenylhexa-1,3-diy-1-yl)phenyl]boronic acid  
(2e)

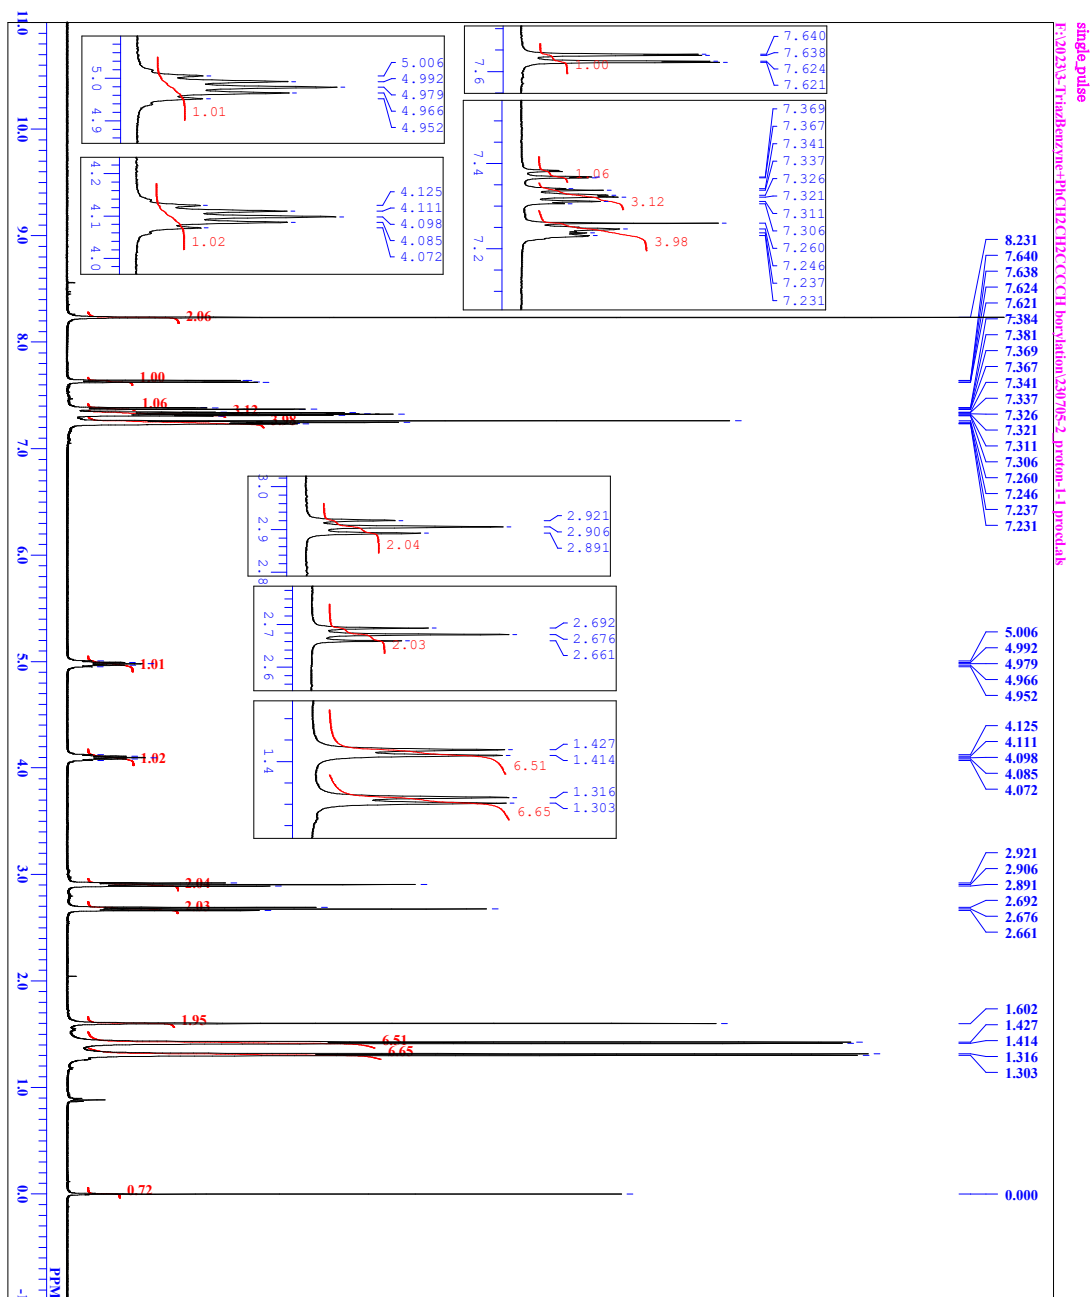

DP1E 230705-2, proton-1-1-procdlak  
 COM1T single\_pulse  
 DATEM 2023-07-05 17:48:16  
 OBN1C IH  
 EX1M1D IH  
 OBF1RQ 500.16 MHz  
 OBS1ET proton-1yp  
 OBS1IN 2.41 KHz  
 POINT 6.01 Hz  
 PRE1Q1 7507.51 Hz  
 SC1ANS 8  
 AC1Q1M 3.4918 sec  
 PD 5.0000 sec  
 PVI 3.00 usec  
 IR1N1C IH  
 CTEM1P 24.0 c  
 SL1V1T CDCl3  
 EX1R1E 0.00 ppm  
 BR 0.10 Hz  
 R1CA1N 56

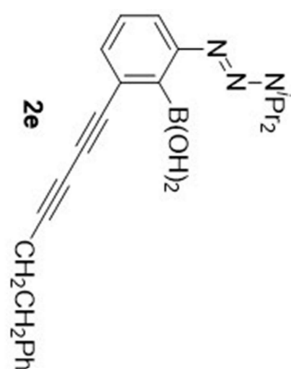

single pulse decoupled gated NOE

F:\2023\1-HazBenz\nc1PhC-HzC-HzC-Cc1H\hazben\230705-2\_carbon-1-1\_procd\ah

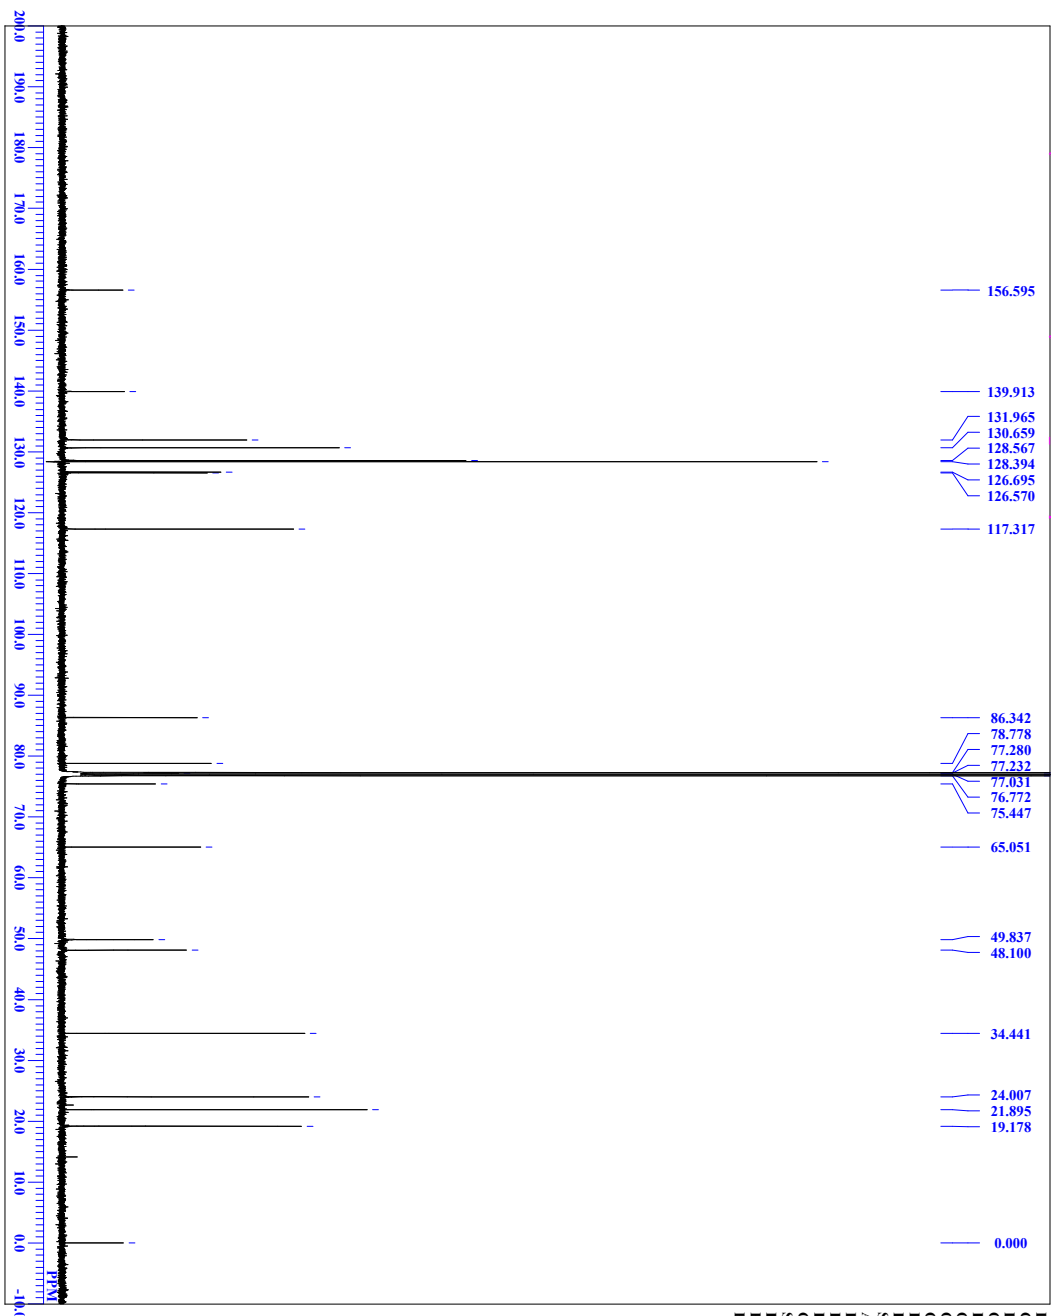

DP1.E 230705-2\_carbon-1-1\_procd\ah  
 CONT 2023-07-05 17:51:43  
 DATE 2023-07-05 17:51:43  
 ORNUC 13C  
 EXM0D carbon\_jsp  
 ORPRO 125.77 MHz  
 OBSER 7.87 KHz  
 OBFTN 4.21 Hz  
 POINT 26214  
 FREQOU 316445.97 Hz  
 SCANS 12000  
 ACQTM 0.8284 sec  
 PD 2.0000 sec  
 PVI 3.46 usec  
 IRENUC 1H 23.5 e  
 CTEMP CDCl3  
 SLVNT 0.00 ppm  
 EXREF 0.10 Hz  
 BP 36  
 RCALIN 36

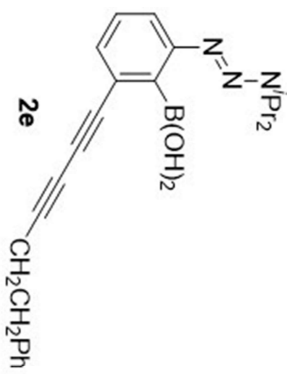





single pulse decoupled gated NOE

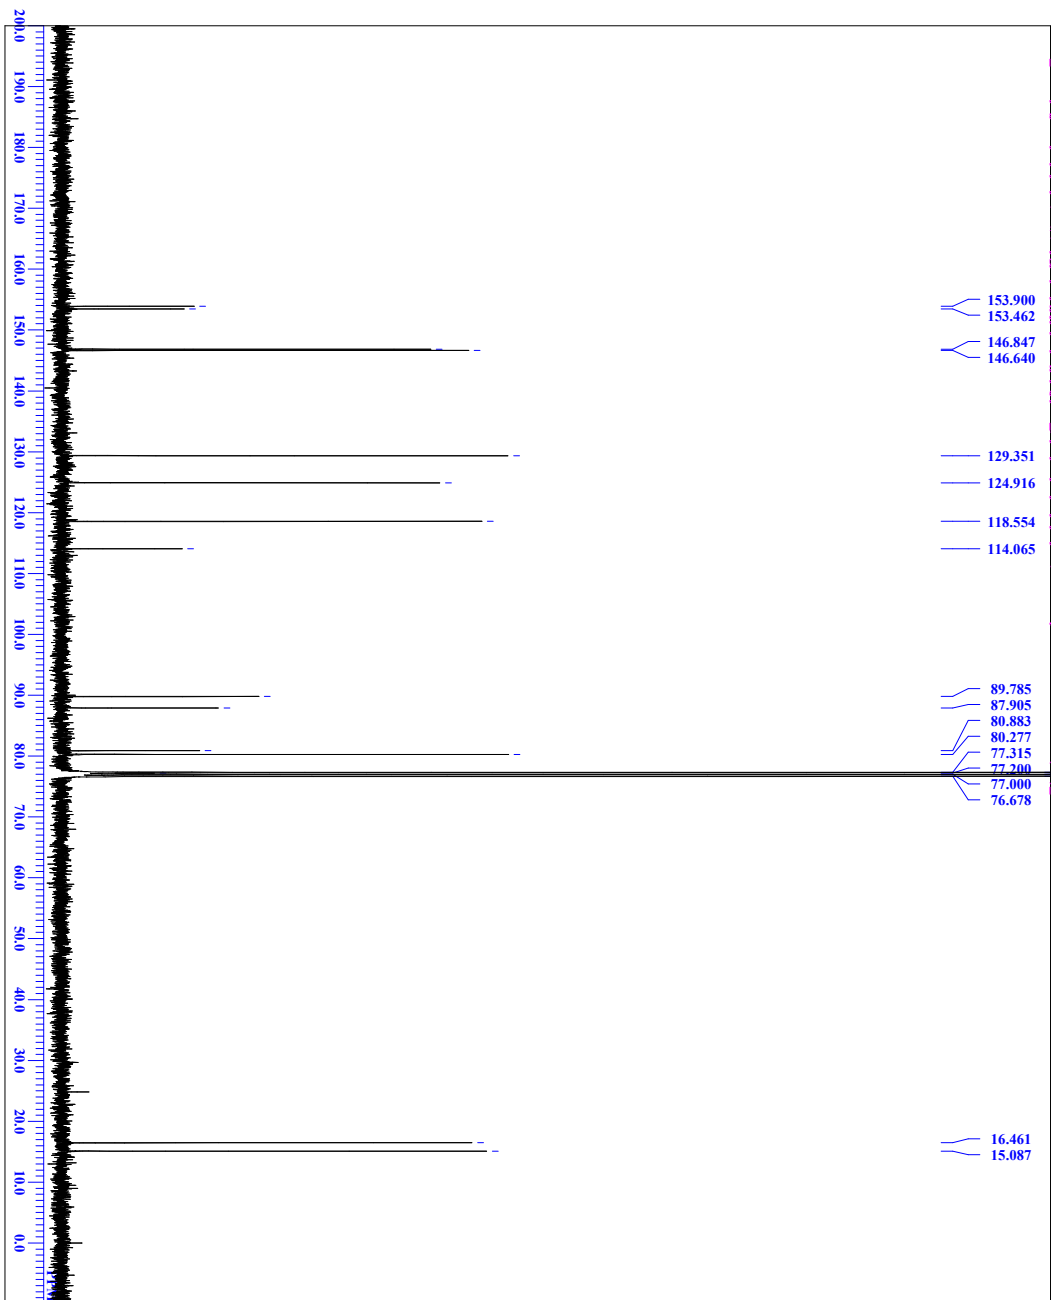

FILE: Y1254recolum(2-6)\_carbon-1-11.a1  
 TITLE: single pulse decoupled gated NOE  
 COMPT 202-07-02 13:12:23  
 D/ATM 13C  
 ORNUC 13C  
 EXM0D carbon\_1xp  
 OBPR0 100.43 MHz  
 OBSET 4.82 KHz  
 OBHN 0.13 Hz  
 POINT 32768  
 FREQ0 25252.59 Hz  
 SC/ANS 1200  
 ACQTM 1.2976 sec  
 PD 1.7024 sec  
 PVI 3.75 usec  
 IRNUC 1H  
 CTEMP 22.3 c  
 SLENT CDCL3  
 EXREF 77.00 ppm  
 BP 1.20 Hz  
 RCGAIN 56

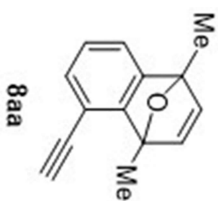

# 1,4-Dimethyl-5-(phenylethynyl)-1,4-dihydro-1,4-epoxynaphthalene (8ba)

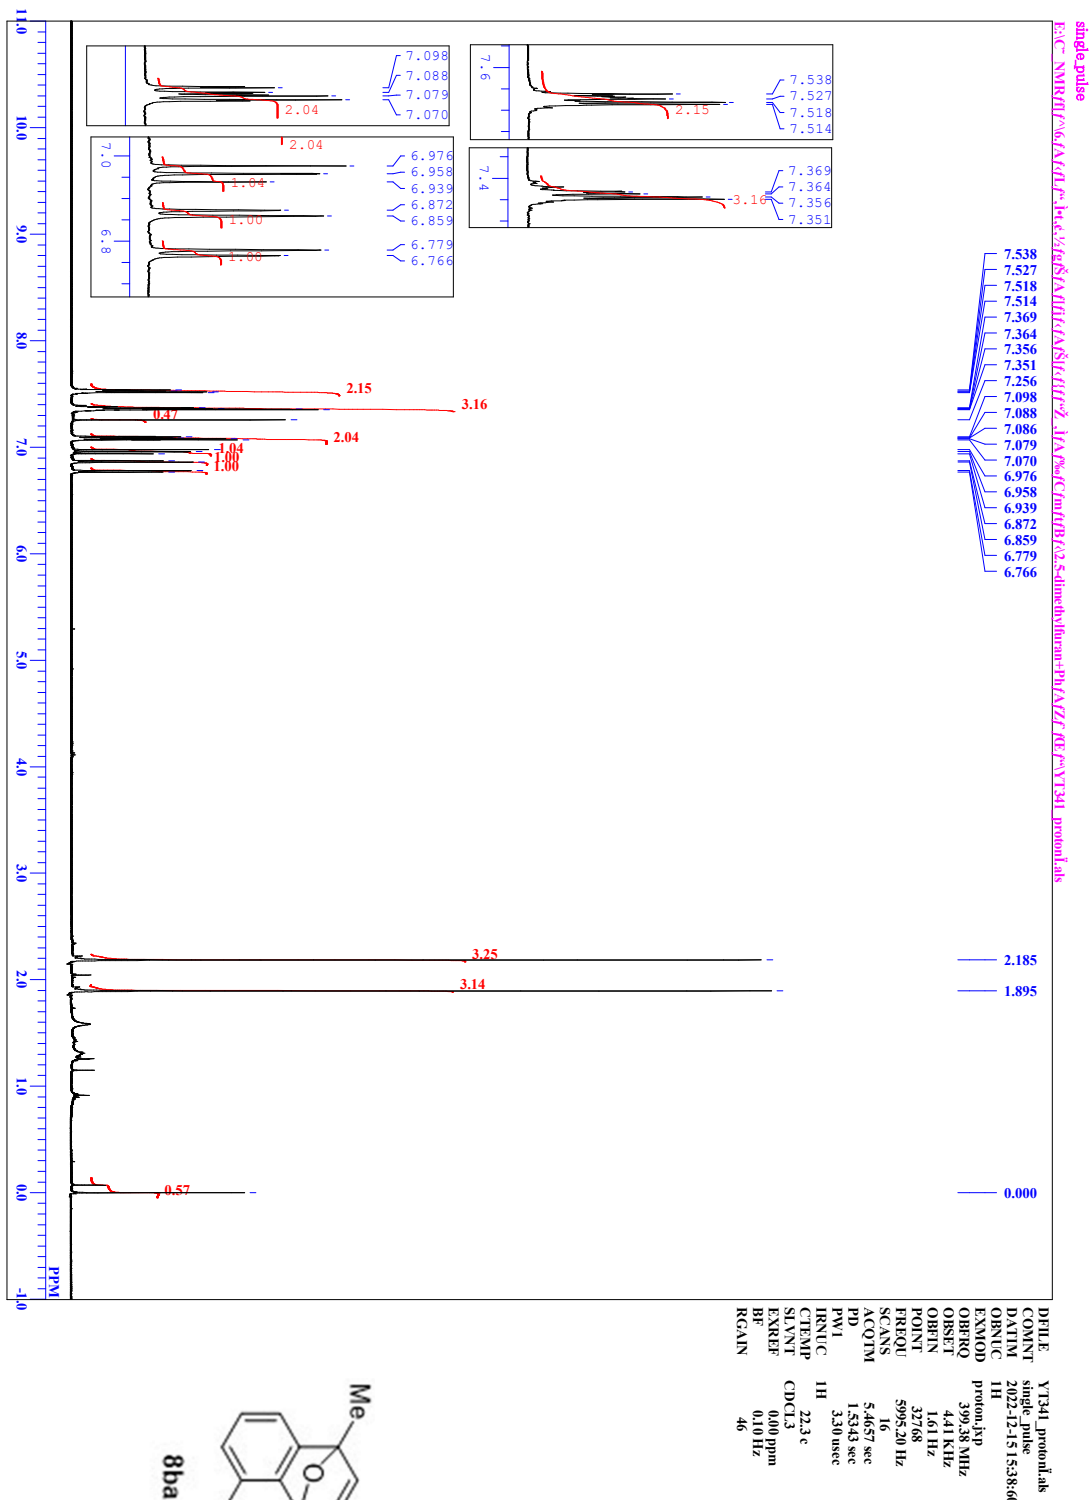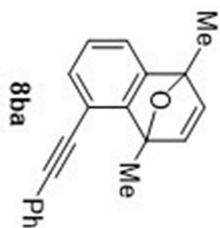

single pulse decoupled gated NOE

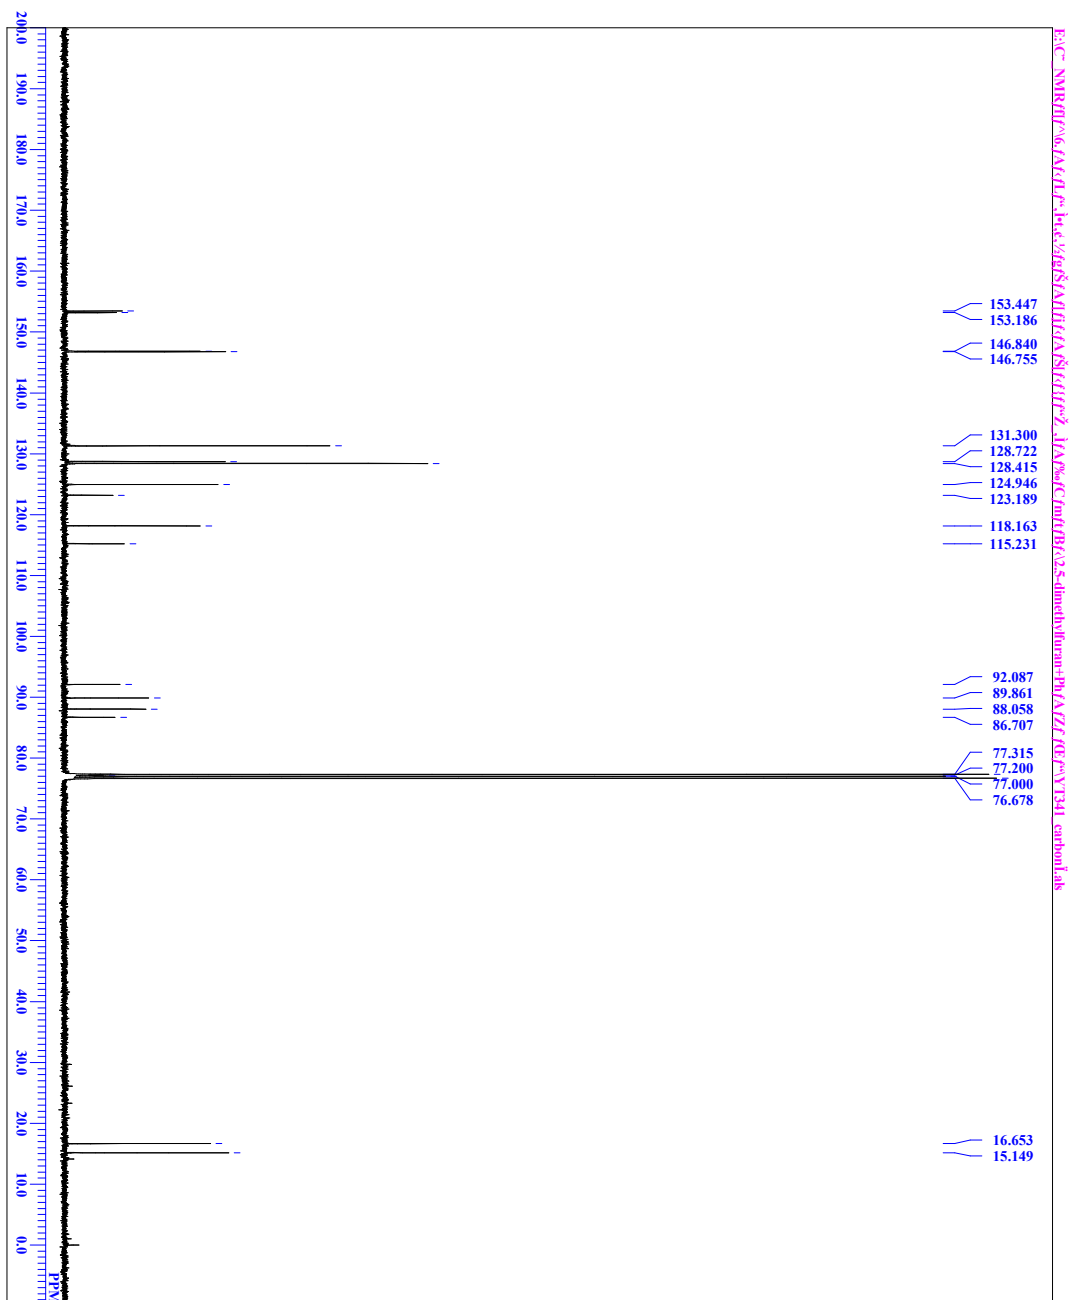

FILE: Y1341\_carbon13k  
 CONT single pulse decoupled gated NOE  
 DATE: 202-12-15 16:44:27  
 D1: 1.30  
 ORNUC 13C  
 EXMUD carbon13p  
 ORPRO 100.43 MHz  
 OBSFET 4.82 KHz  
 OBSIN 0.13 Hz  
 POINT 32768  
 FREQOU 25252.59 Hz  
 SCANS 2000  
 ACQTM 1.2976 sec  
 PD 1.7024 sec  
 PVI 3.75 usec  
 IRENUC 1H  
 CTEMP 22.0 c  
 SLENT CDCL3  
 EXREF 77.00 ppm  
 BR 1.20 Hz  
 RCGAIN 56

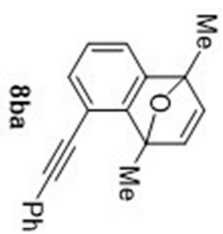

5-(4-(*tert*-Butyldimethylsilyloxy)-but-1-yn-1-yl)-1,4-dimethyl--1,4-dihydro-1,4-epoxynaphthalene (8ca)

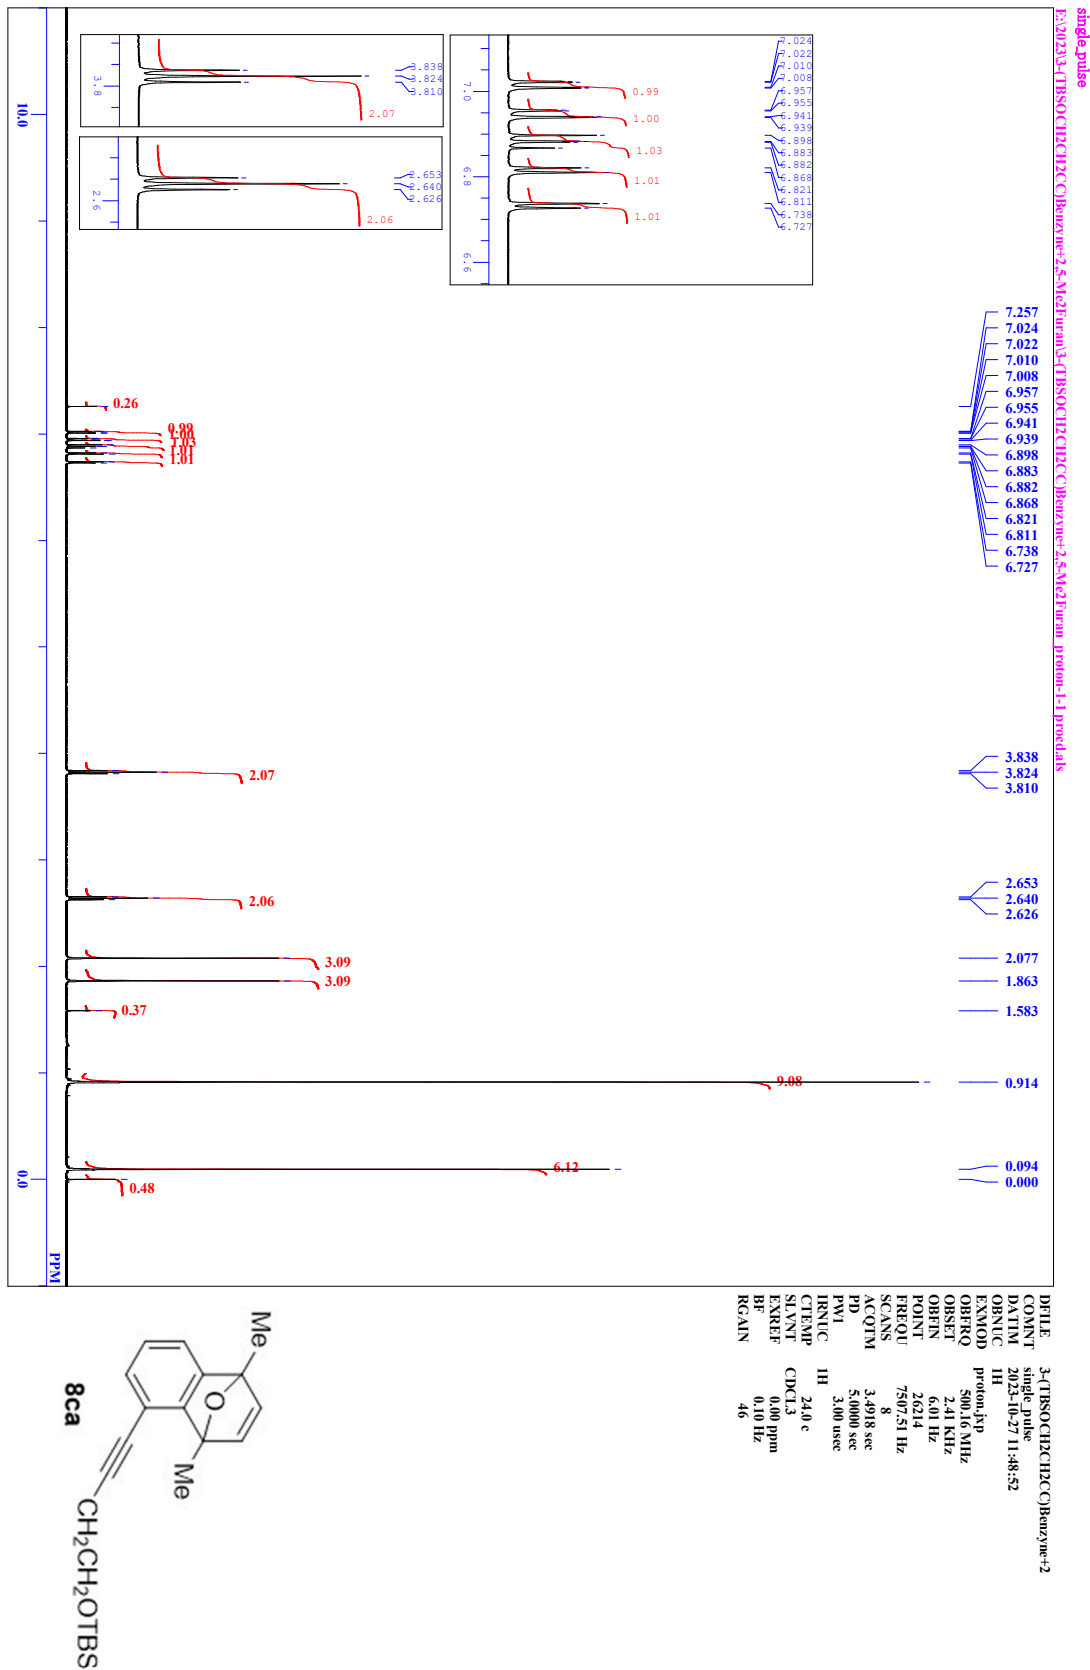

single pulse decoupled gated NOE

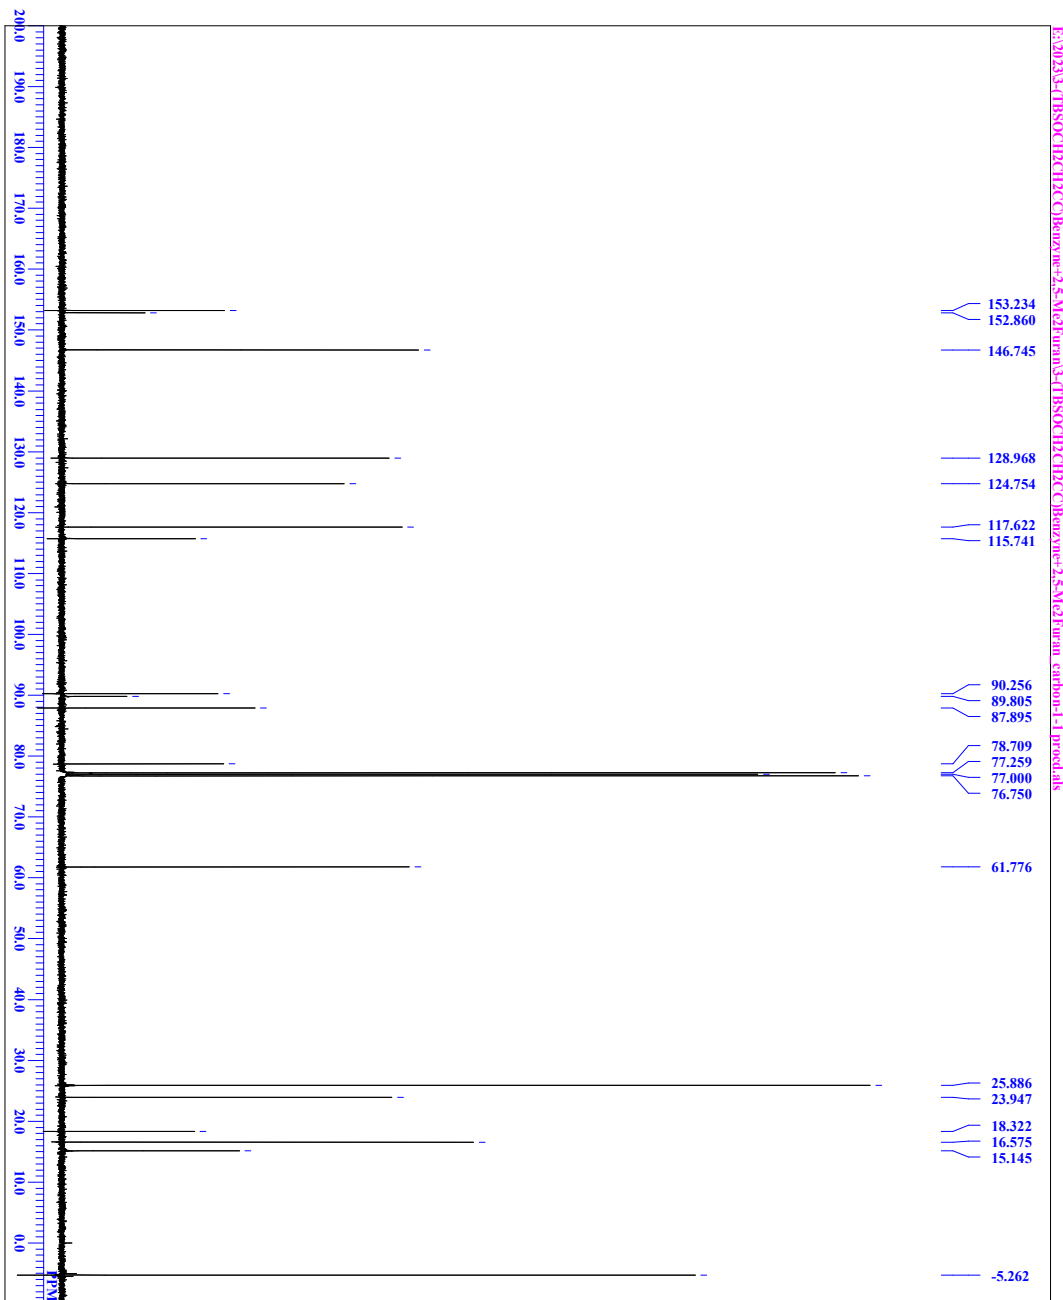

DPPE 3-(TBSO)CH<sub>2</sub>CH<sub>2</sub>CO<sub>2</sub>Benzene<sup>2</sup>  
 COUNT single pulse decoupled gated NOE  
 DATE 2023-10-27 11:50:38  
 ORNUC 13C  
 EXMOD carbon<sup>13</sup>C  
 ORPRO 125.77 MHz  
 OBSFET 7.87 KHz  
 OBSHN 4.21 Hz  
 POINT 26214  
 FREQOU 1720  
 SCANS 3164557 Hz  
 ACQTM 1720  
 PD 0.8284 sec  
 PVI 2.0000 sec  
 IRENIC 3.46 usec  
 CTEMP 24.1 c  
 SLYNT CDCl<sub>3</sub>  
 EXREF 77.00 ppm  
 BR 0.10 Hz  
 RGAIN 36

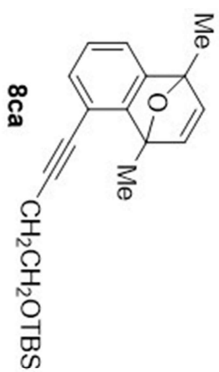

# 5-Ethynyl-9-phenyl-1,4-dihydro-1,4-epiminonaphthalene (8af)

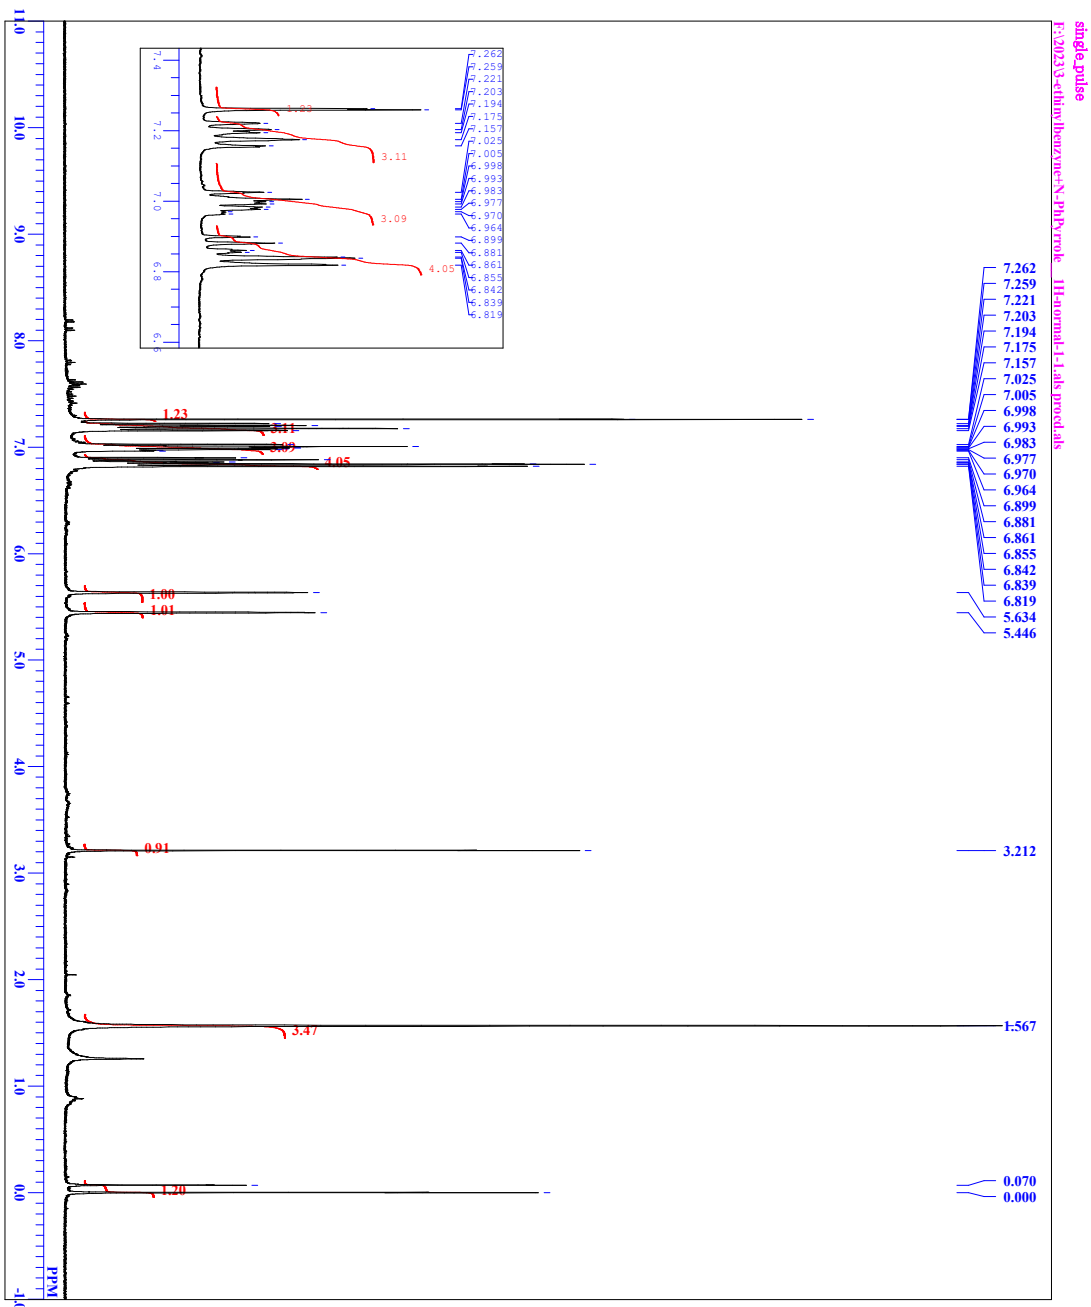

single pulse  
F:\2023\3-ethynylbenzylme-N-Ph\Prok - H-4-formid-1-1-af-prod-af

FILE 3-ethynylbenzylme-N-Ph\Prok -  
 COM1 single\_pulse  
 DAT1 2023-09-22 19:49:59  
 OBNC H  
 EXM0D single\_pulse.fxp  
 OBR00 397.78 MHz  
 OBS01 4.19 KHz  
 OBR0N 7.29 Hz  
 POINT 26214  
 PR000 6002.40 Hz  
 SCANS 8  
 ACQTM 4.5673 sec  
 PD 5.0000 sec  
 PVI 3.35 usec  
 IRNUC H 22.5 e  
 CTMPC CDCl3  
 SLVNT 0.00 ppm  
 EXREF 0.10 Hz  
 BF 46  
 RGAIN

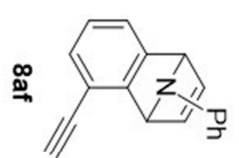

single pulse decoupled gated NOE

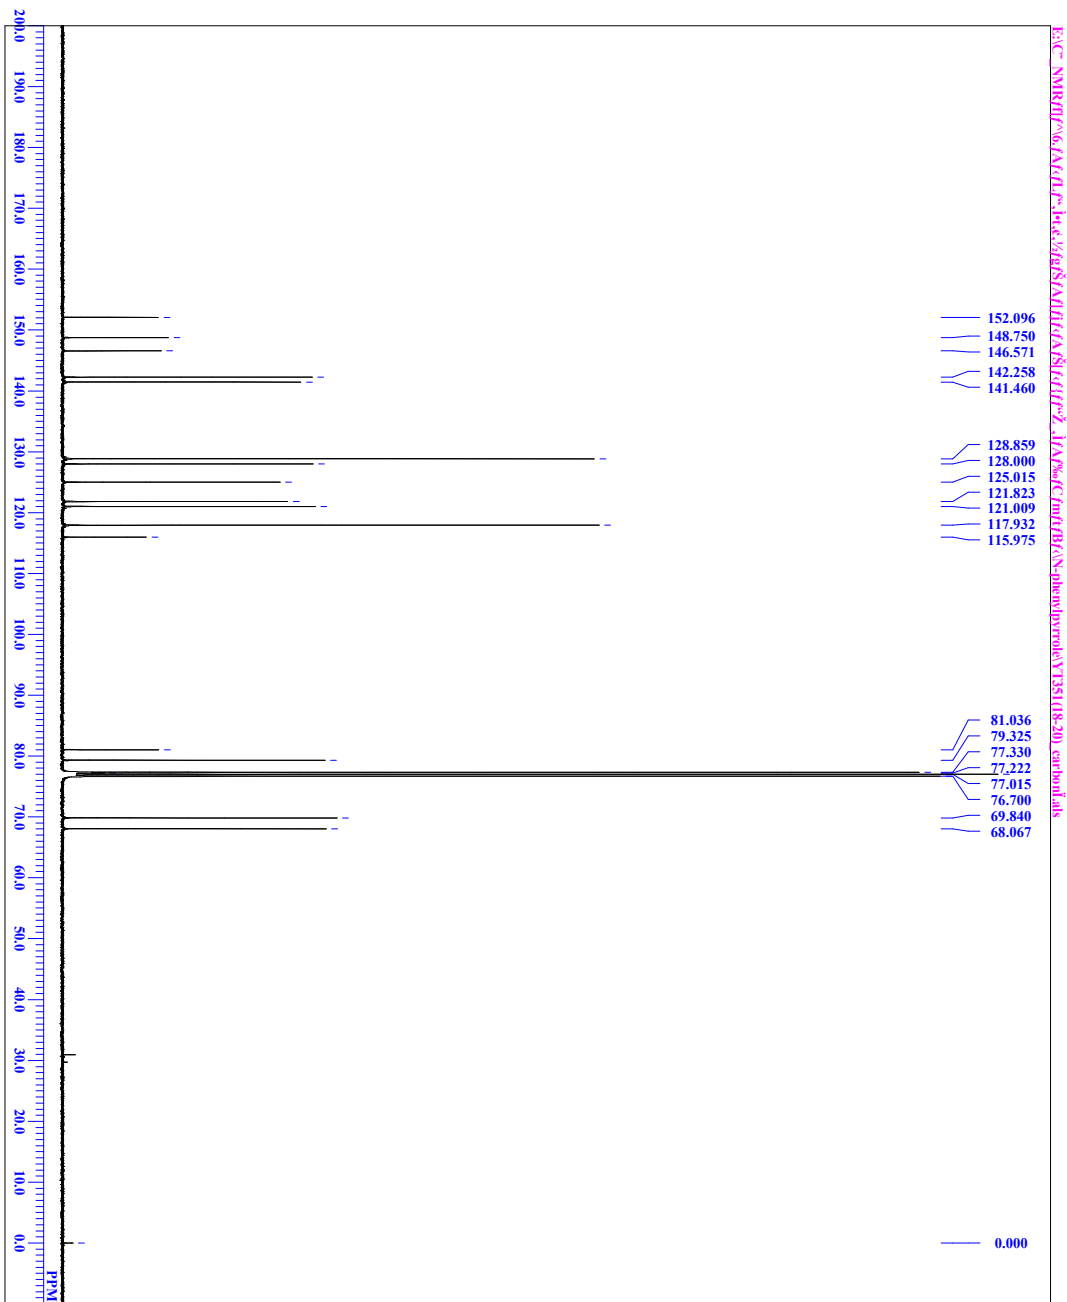

FILE: Y1351(18-20)\_carbon1.als  
 TITLE: single pulse decoupled gated NOE  
 CONT: 202-12-24 16:15:16  
 D/ATM: 13C  
 ORNUC: carbon1.als  
 EXMUD: carbon1.als  
 ORPRO: 100.43 MHz  
 OBSST: 4.82 KHz  
 ORBHN: 0.13 Hz  
 POINT: 32768  
 FREQOU: 25252.53 Hz  
 SC/ANS: 15000  
 ACQTM: 1.2976 sec  
 PD: 1.7024 sec  
 PVI: 3.75 usec  
 IRNTIC: 1H  
 CTEMP: 21.5 c  
 SLENT: CDCl3  
 EXREF: 0.00 ppm  
 BP: 1.20 Hz  
 RCGAIN: 56

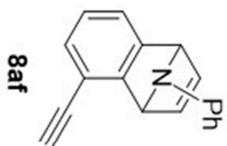



# Ethyl 2-(4-Ethynyl-1,2,3-benzotriazol-1-yl)acetate (8ag)

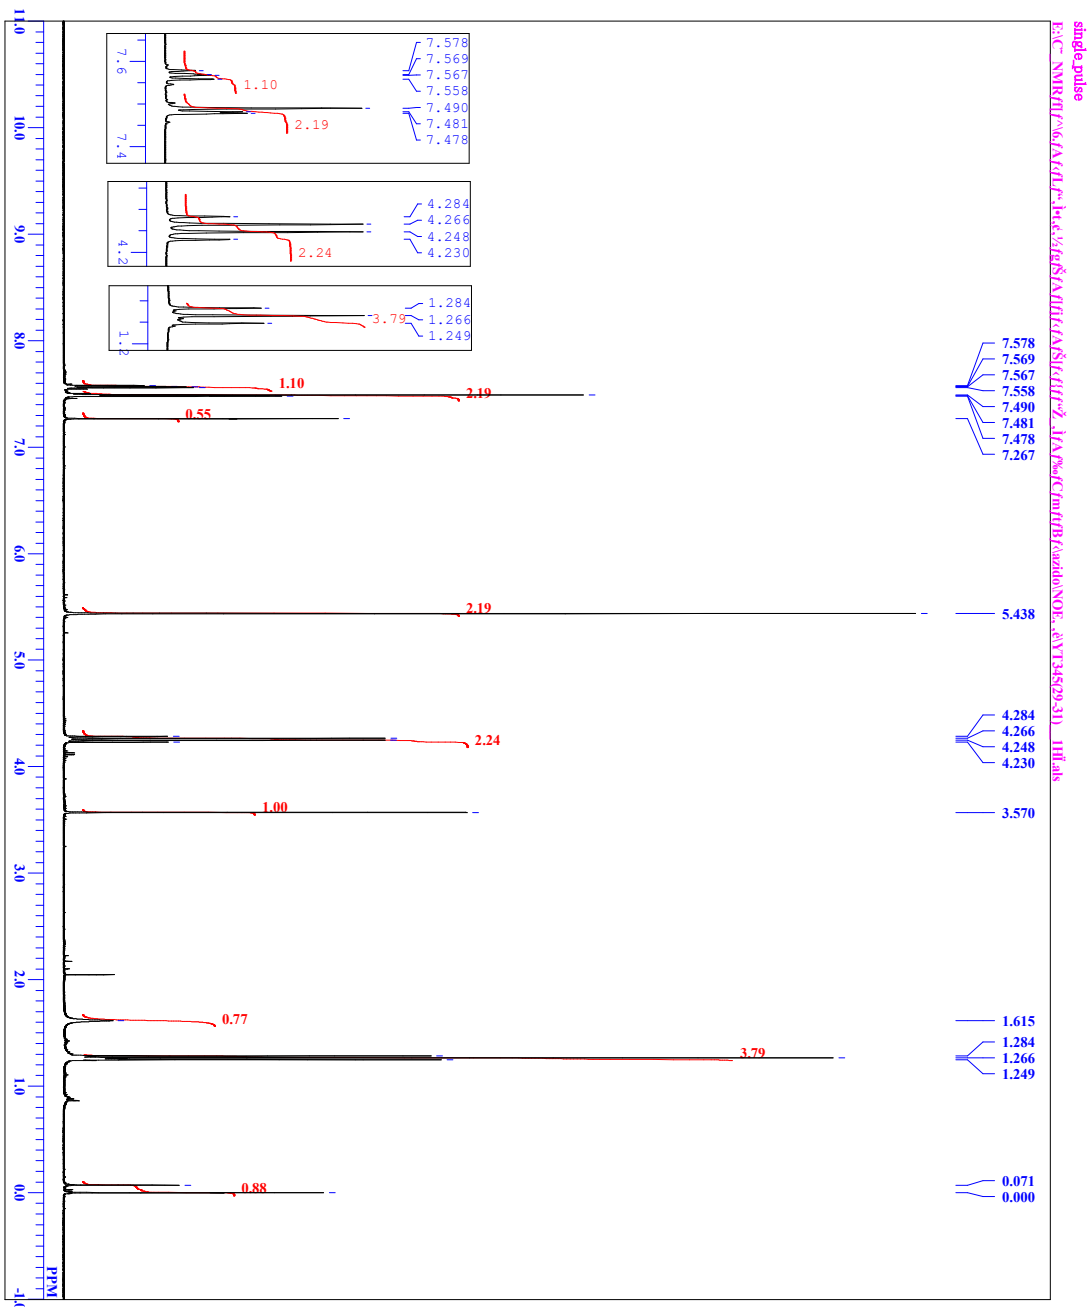

FILE: Y134S29-31\_1H1.fid  
 CONIN: single\_pulse  
 DATIM: 2022-12-08 14:05:38  
 OBNUC: 1H  
 EXMID: single\_pulse.fpp  
 OBRQ: 399.78 MHz  
 OBSF1: 4.19 KHz  
 OBRN: 7.29 Hz  
 POINT: 26214  
 PRFQ: 600240 Hz  
 SCANS: 16  
 ACOIM: 4.5673 sec  
 PD: 5.0000 sec  
 PW1: 3.35 usec  
 IRNUC: 1H  
 CTEMP: 21.3 c  
 SIVT: CDCl3  
 EXREF: 0.00 ppm  
 BF: 0.10 Hz  
 RGAIN: 42

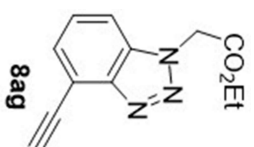

single pulse decoupled gated NOE

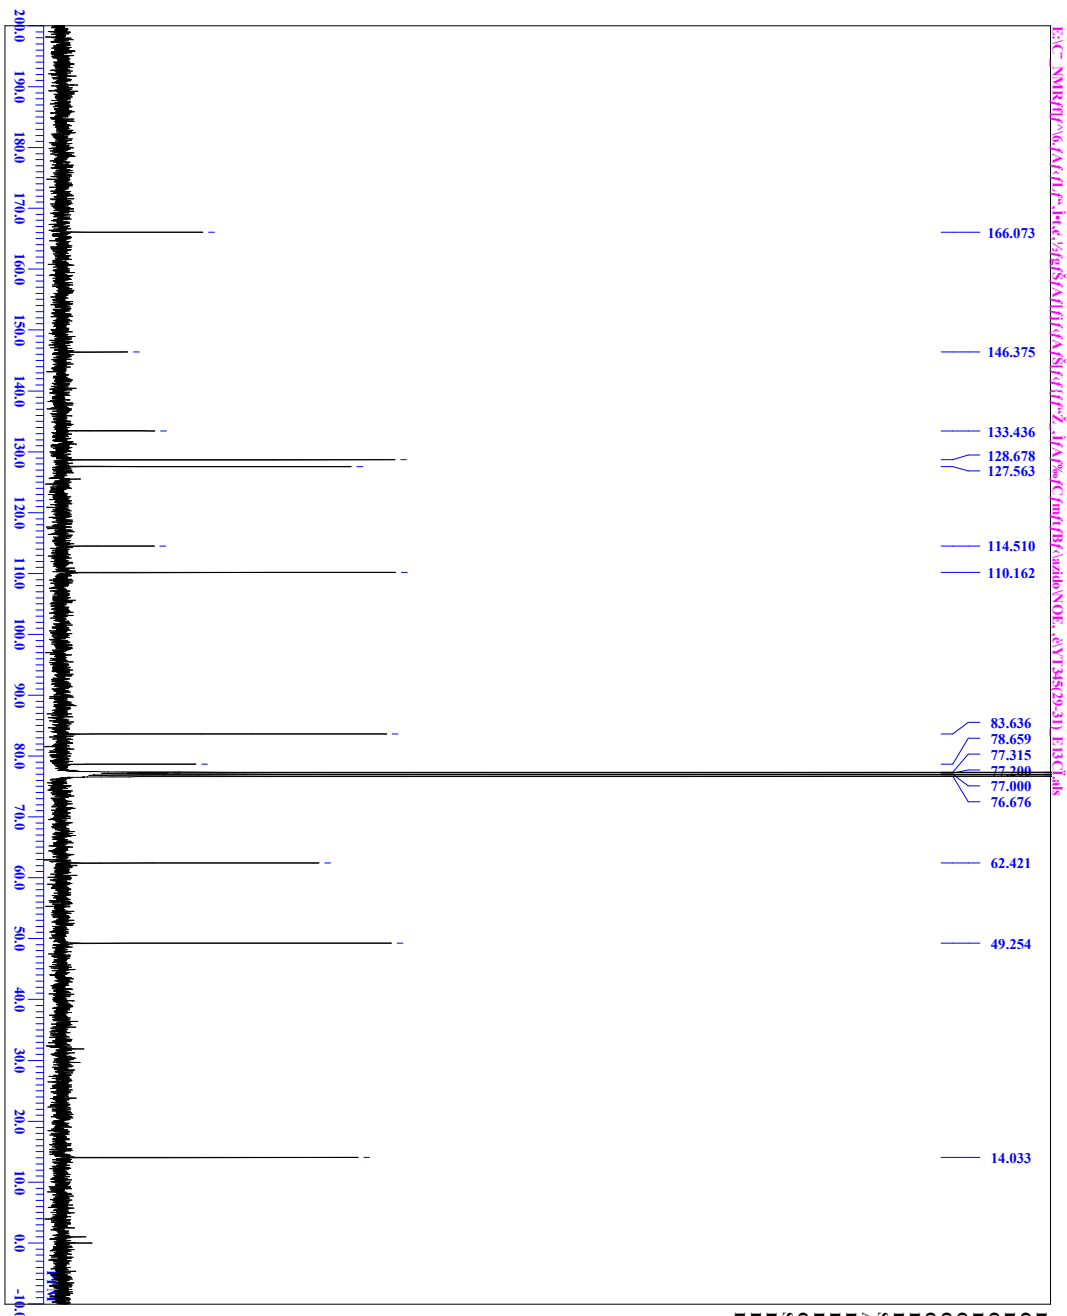

FILE: Y1348(29-31)\_E13C1as  
 CONT single pulse decoupled gated NOE  
 DATE 202-12-08 14:08:38  
 DATTM 13C  
 ORNUC  
 EXMOD single\_pulse\_dec  
 ORPRO 100.53 MHz  
 OBSER 5.35 KHz  
 OBST 5.86 Hz  
 POINT 26214  
 FREQOU 251256.9 Hz  
 SCANS 1500  
 ACQTM 1.0433 sec  
 PD 2.0000 sec  
 PVI 3.60 usec  
 IRENUG 1H  
 CTEMP 21.2 c  
 SLENT CDCL3  
 EXREF 77.00 ppm  
 BR 1.20 Hz  
 RGAIN 60

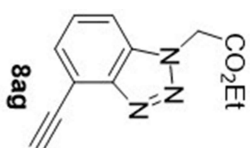

# Ethyl 2-(7-Ethynyl-1,2,3-benzotriazol-1-yl)acetate (8ag')

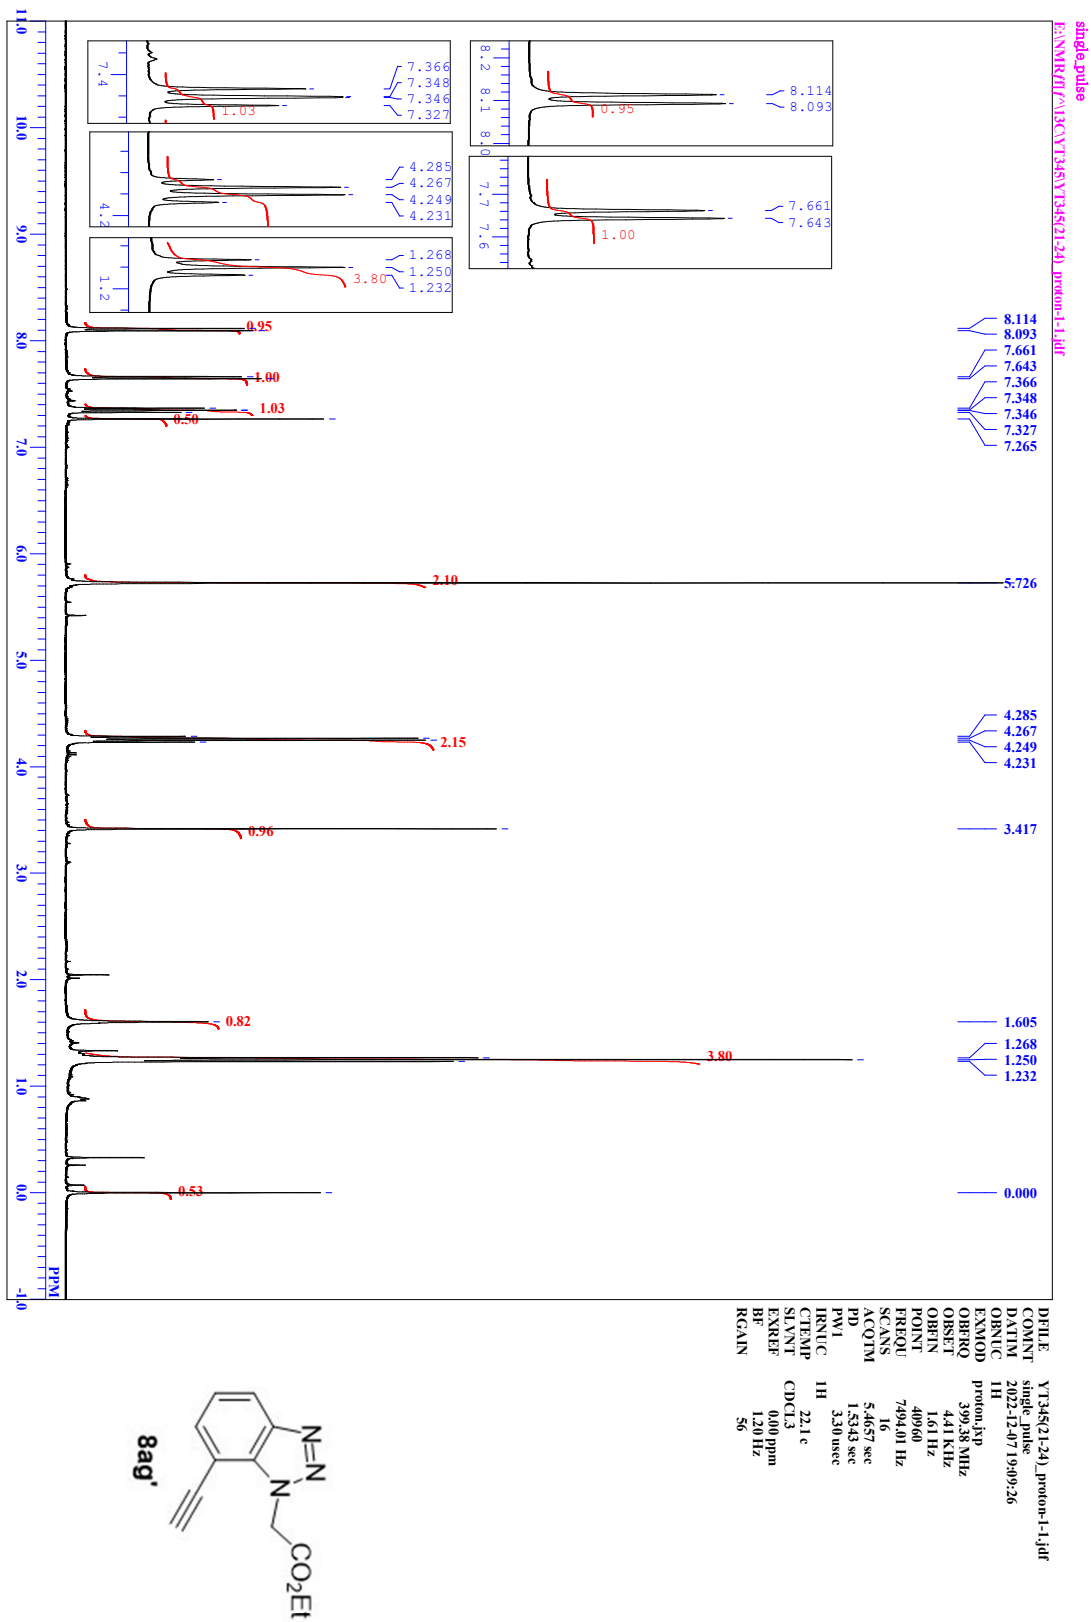

single pulse decoupled gated NOE

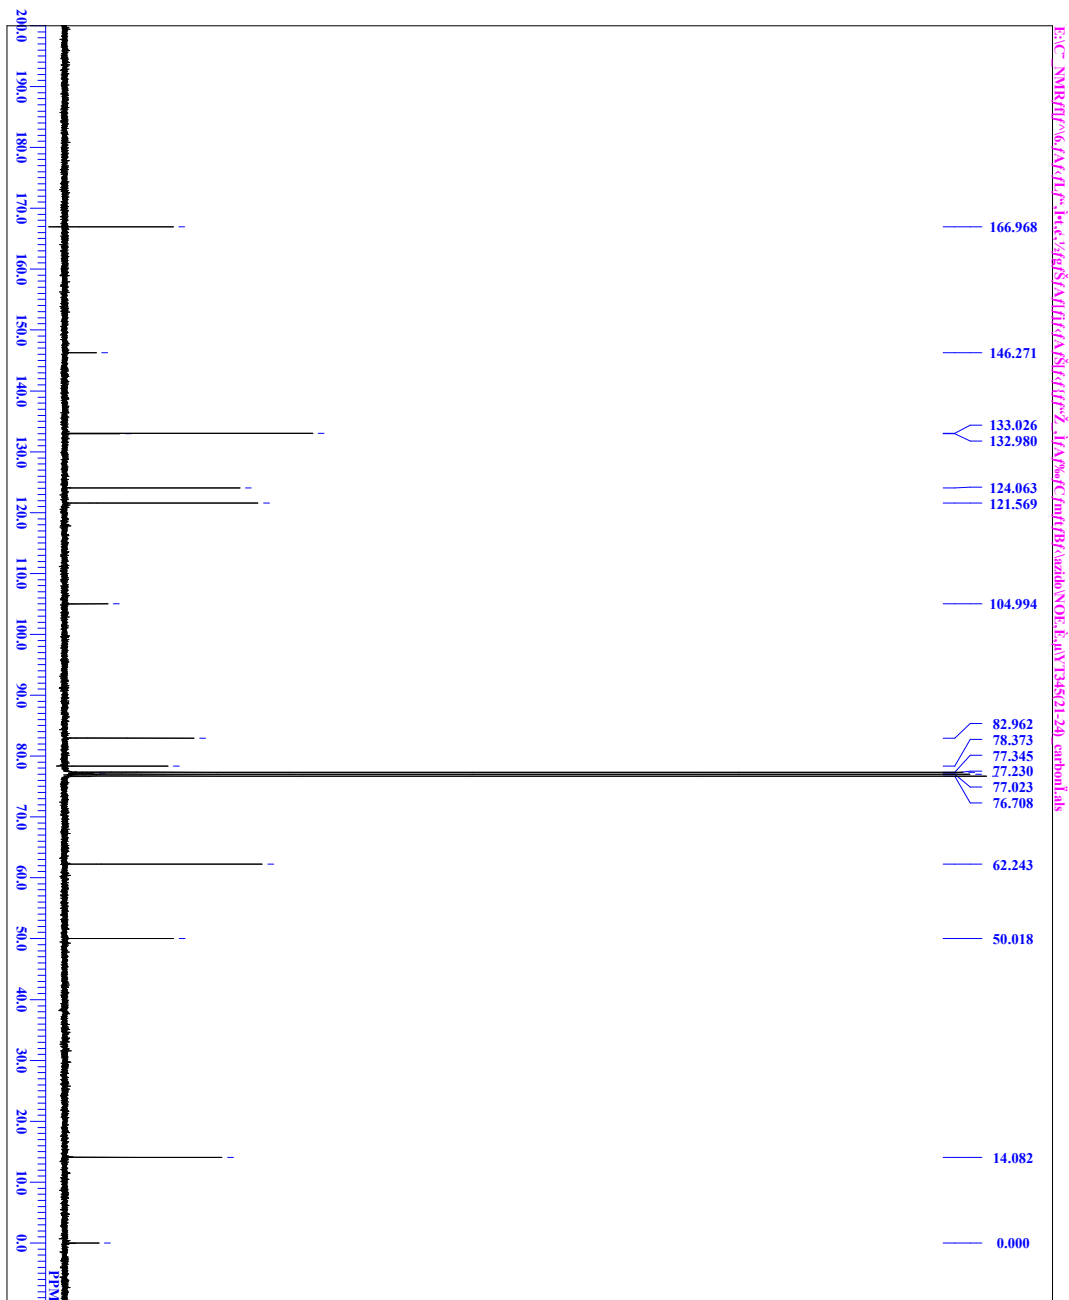

FILE: Y1348421-24\_carbon01\_als  
 TITLE: single pulse decoupled gated NOE  
 CONNT 13C  
 D/ATM 202-12-07 19:25:35  
 ORNUC 13C  
 EXMOD carbon\_1xp  
 OBSRO 100.43 MHz  
 OBSST 482 KHz  
 OBSFN 0.13 Hz  
 POINT 32768  
 FREQOU 25252.59 Hz  
 SC/ANS 4000  
 ACQTM 1.2976 sec  
 PD 1.7024 sec  
 PWT 3.75 usec  
 IRNUC 1H  
 CTEMP 21.9 c  
 SLVNT CDCl3  
 EXREF 0.00 ppm  
 BP 0.10 Hz  
 RCGAIN 56

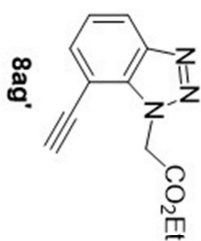

**3-Ethynyl-N-methyl-N-phenylaniline (8ah) and 2-Ethynyl-N-methyl-N-phenylaniline (8ah')**

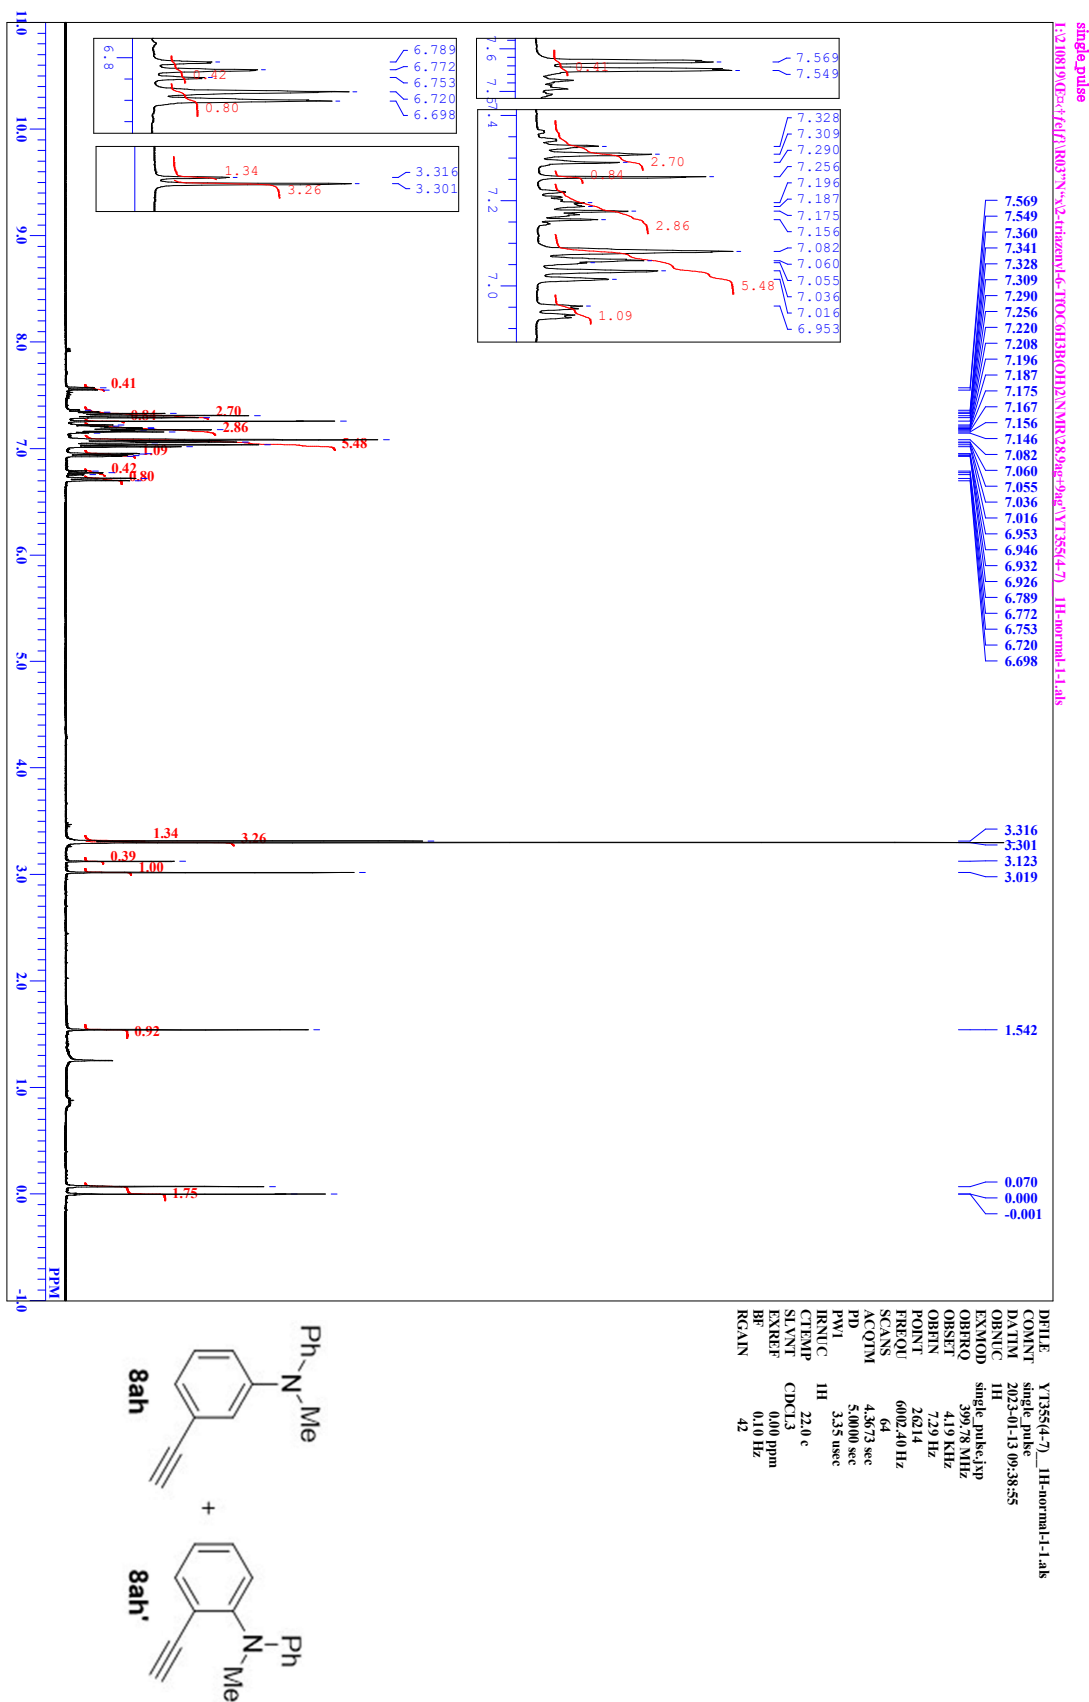

2-Ethynyl-N-methyl-N-phenylaniline (8ah')

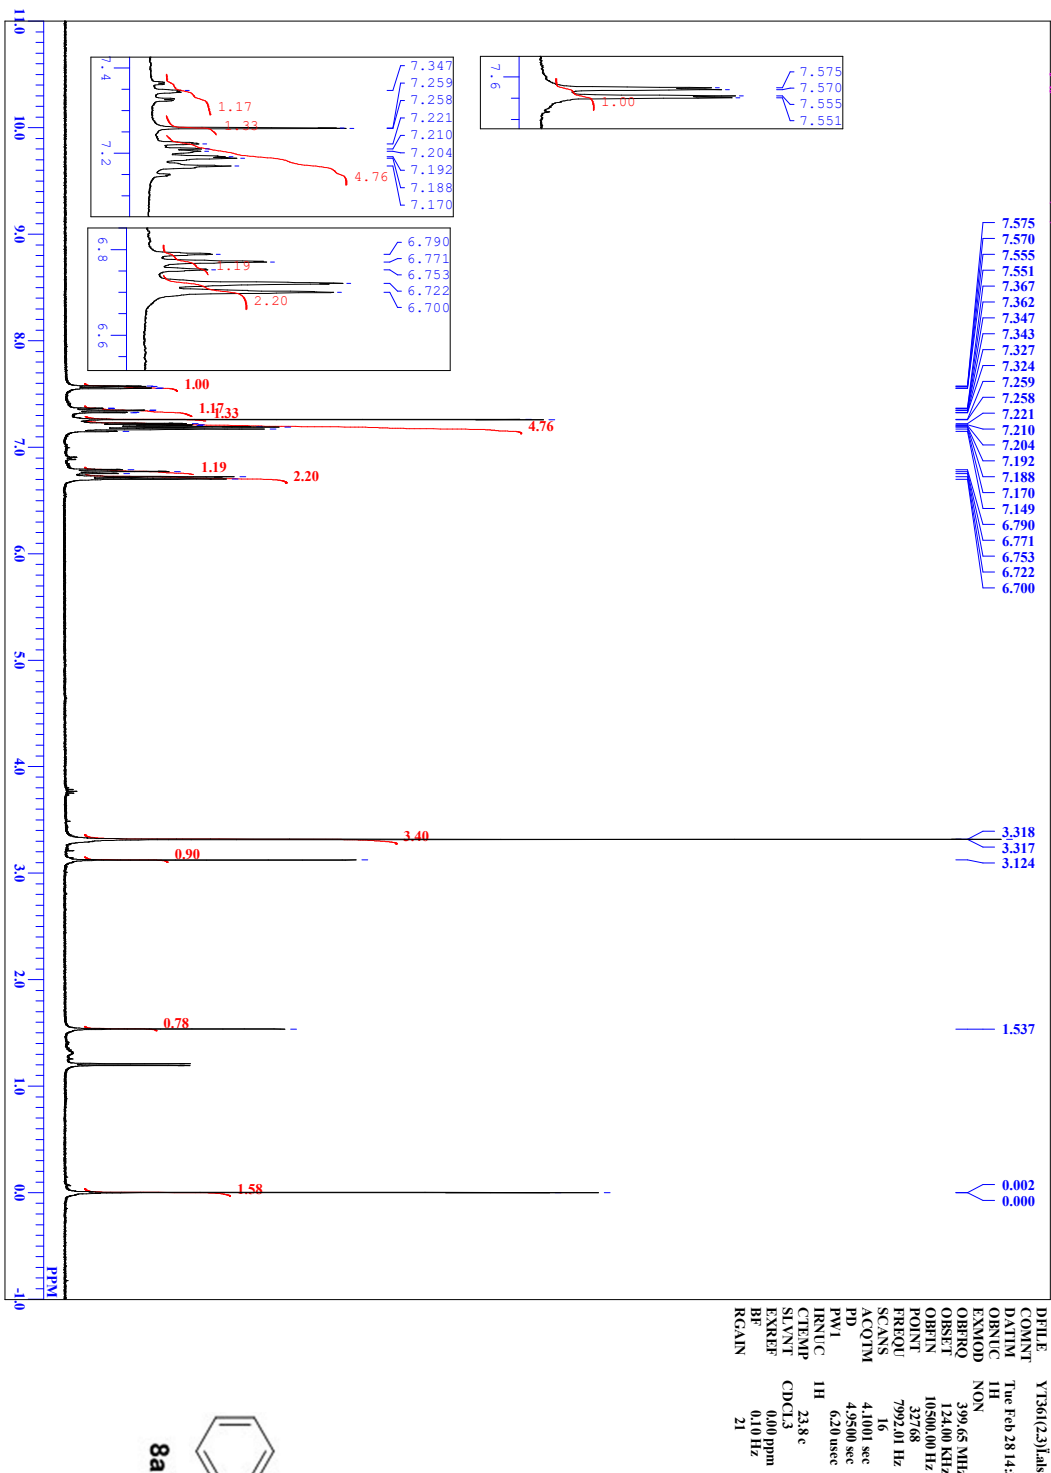

FILE: Y1361(23).hls  
 CONT: Tue Feb 28 14:37:32 2023  
 DATIM: 1H  
 OBNUC: CDCl<sub>3</sub>  
 EXNOID: NON  
 OBRQ: 399.65 MHz  
 ORES1: 124.00 KHz  
 ORES2: 10506.00 Hz  
 POINT: 32768  
 PREQ: 7992.01 Hz  
 SCANS: 16  
 ACOUM: 4.1001 sec  
 PD: 4.9500 sec  
 PW1: 6.20 usec  
 IRNUC: 1H  
 CTEMP: 23.8 c  
 SLEVT: CDCl<sub>3</sub>  
 EXREF: 0.00 ppm  
 BF: 0.10 Hz  
 RGAIN: Z1

3,17-O-Bis(*tert*-butyldimethylsilyl)-17 $\alpha$ -{(9-phenyl-1,4-dihydro-1,4-epiminonaphthalen-5-yl)ethynyl}estradiol (8df)

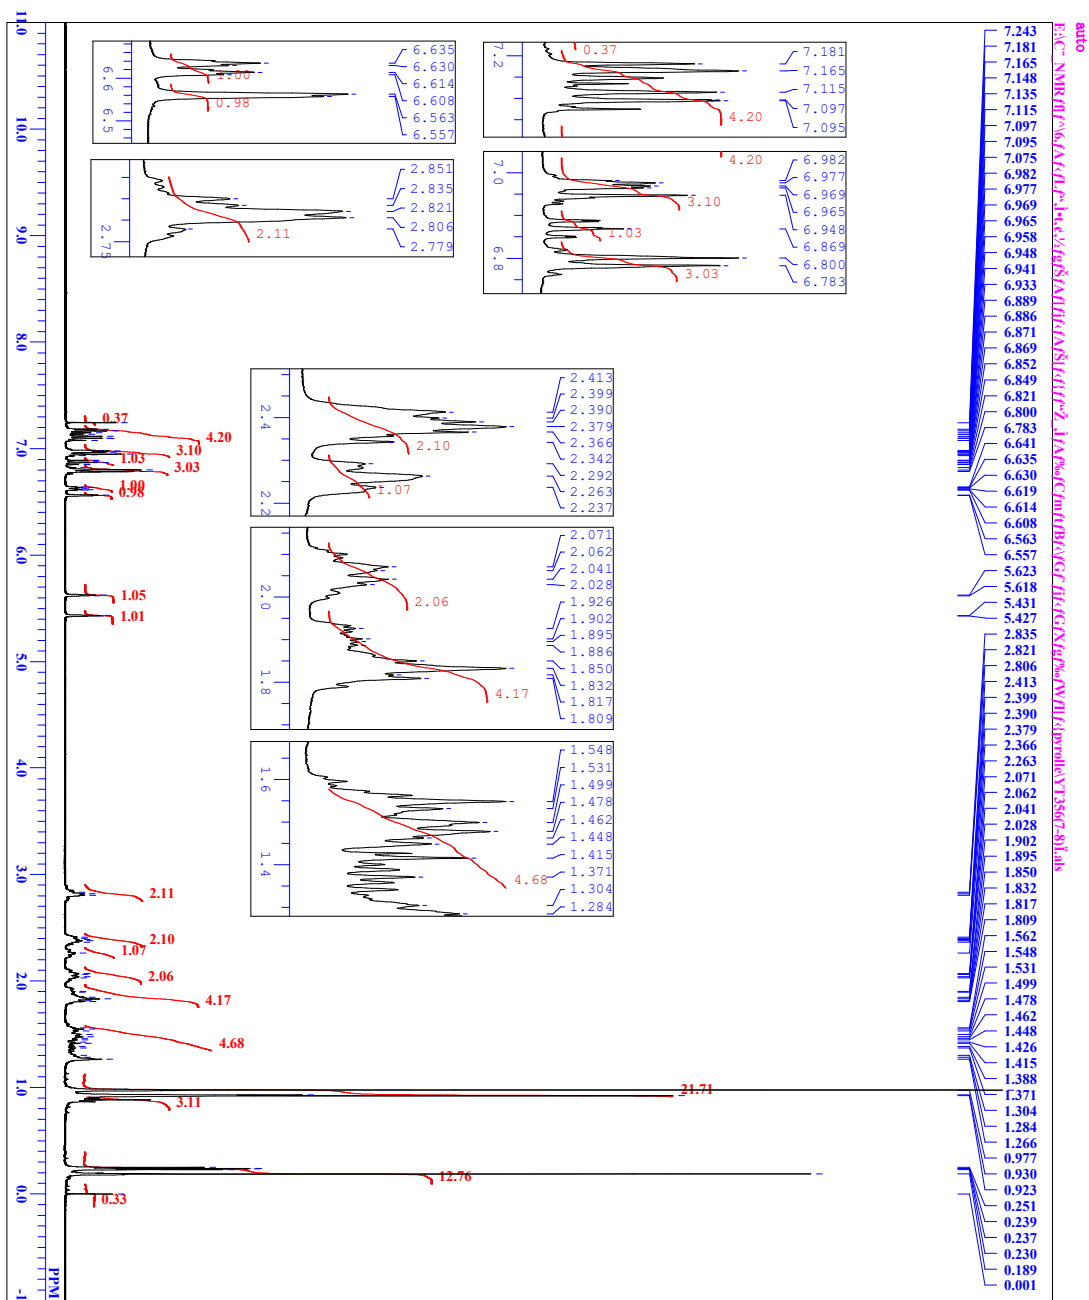

DPT1E Y13567-381.xls  
 COM1T auto  
 DAT1M Thu Jan 19 18:40:29 2023  
 ORB1C 1H  
 EXAM1D NON  
 OBS1Q 399.65 MHz  
 OBS1T 124.00 KHz  
 OBS1F 16500.00 Hz  
 POINT 32768  
 FREQ1U 7992.01 Hz  
 SCANS 16  
 ACQ1M 4.1001 sec  
 PD 4.9500 sec  
 PVI 6.20 usec  
 IRN1C 1H  
 CTEMP 23.2 c  
 S1VMT CDCl3  
 EXREF 0.00 ppm  
 BR 0.10 Hz  
 RC1AIN 12

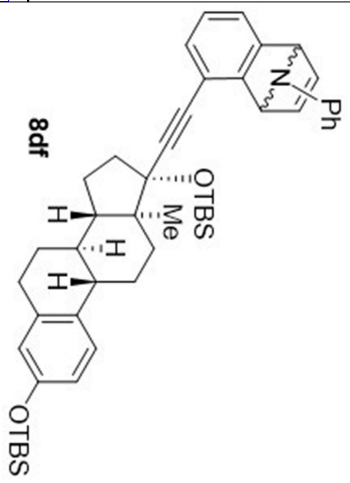

# 1,4-Dimethyl-5-(6-phenylhexa-1,3-diyne-1-yl)-1,4-dihydro-1,4-epoxynaphthalene (8ea)

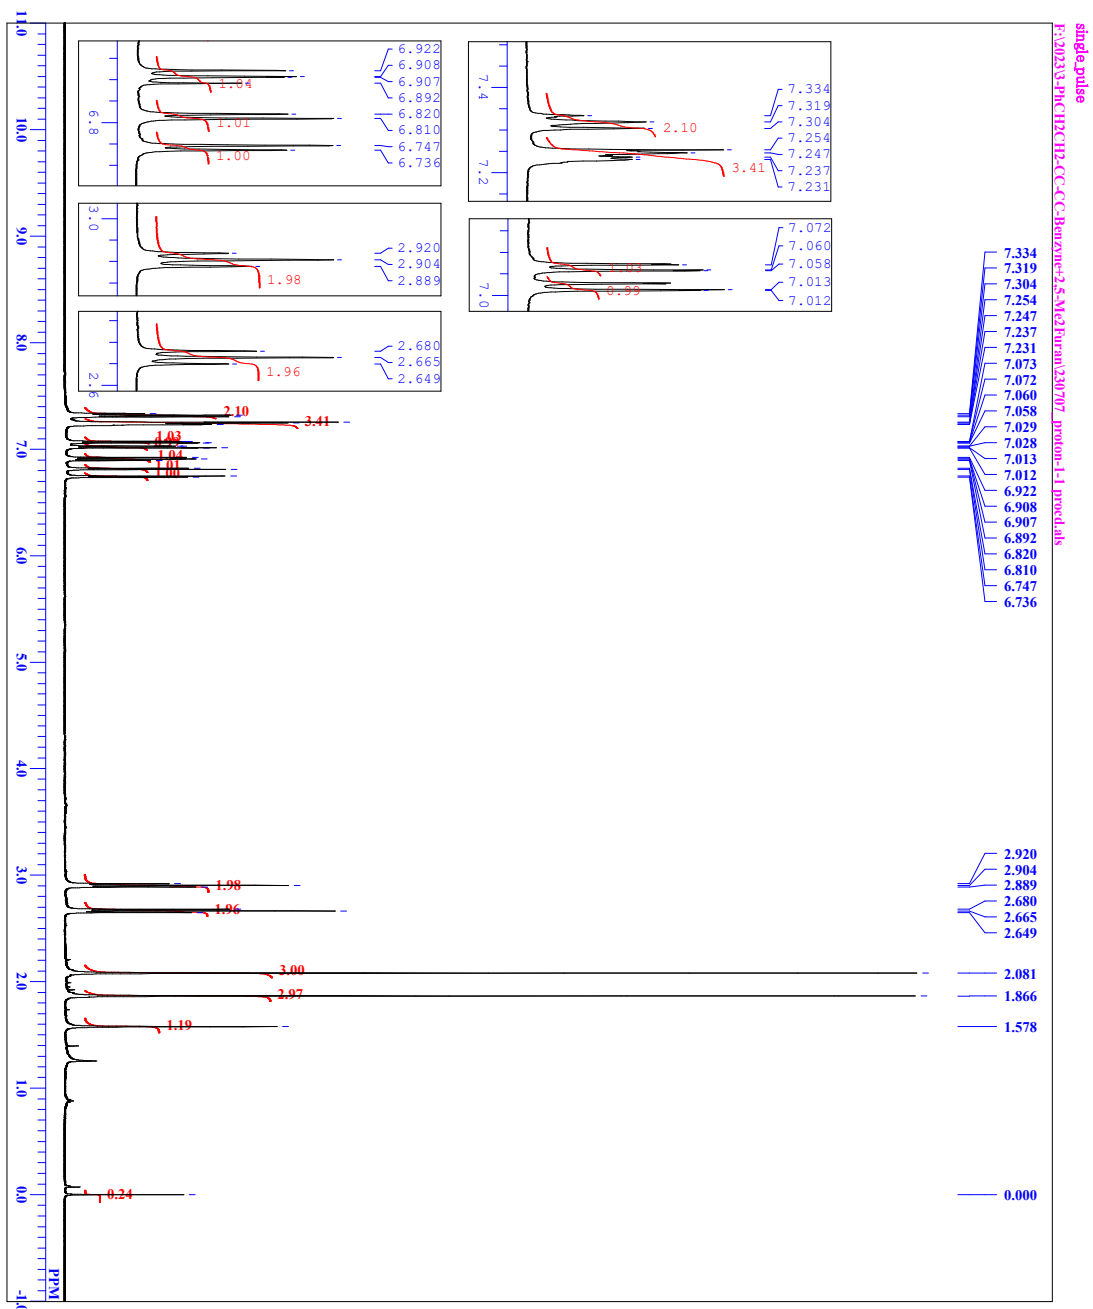

FILE 230707\_proton-1-1-procd.aks  
 CONTN single\_pulse  
 DATIM 2023/07/09:18:53  
 ORNIC 1H  
 EXMCD proton\_1xp  
 OBRQ0 500.16 MHz  
 OBSER1 26214  
 OBRFN 6.01 Hz  
 POINT 7507.51 Hz  
 FREQ0 8  
 SCANS 3.4918 sec  
 ACOIM 5.0000 sec  
 PD 3.00 usec  
 PWT 23.8 e  
 IRNIC CDCL3  
 CTMPC 0.00 ppm  
 SLVNT EXREF 0.10 Hz  
 BF 46  
 RGAIN 46

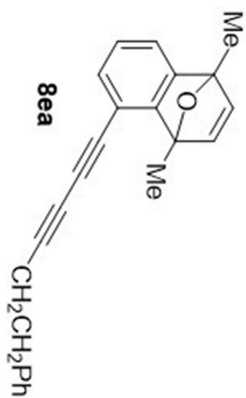



single pulse decoupled gated NOE

F:\2023\1-PhC1H2C1H2-CC-CC-Bea2\Run\230707\_carbon-1-1-procds.fls

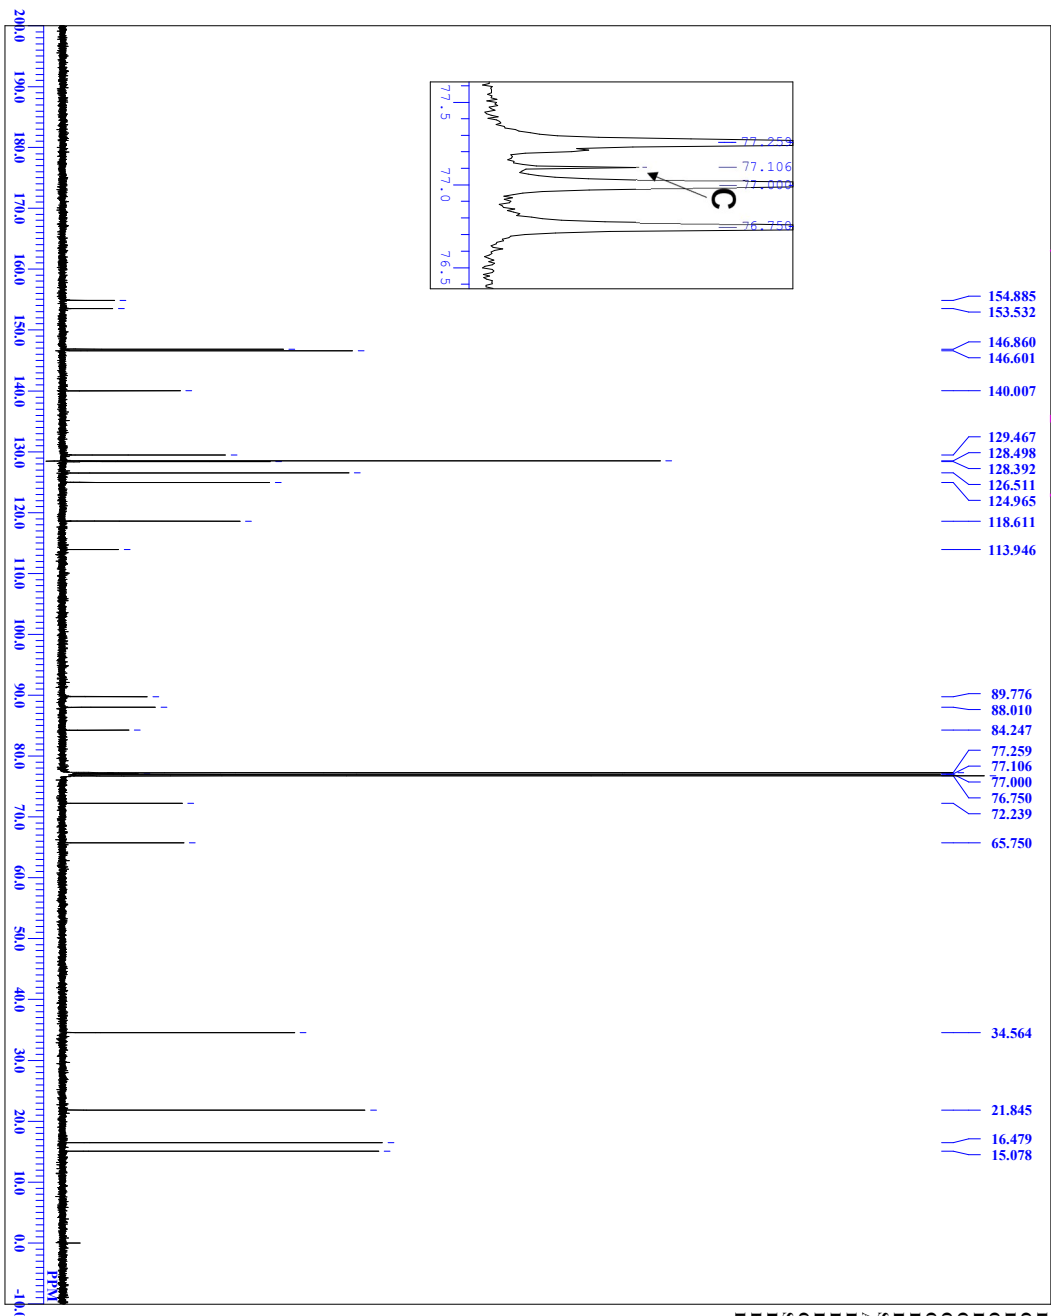

DNAME 230707\_carbon-1-1-procds  
 COUNT single pulse decoupled gated NOE  
 DNAME 2023-07-07 09:20:54  
 ORNUC 13C  
 EXMOL carbon-13p  
 OBSRO 125.77 MHz  
 OBSST 7.87 KHz  
 OBSIN 4.21 Hz  
 POINT 26214  
 FREQOU 3164537 Hz  
 SCANS 2400  
 ACQTM 0.8284 sec  
 PD 2.0000 sec  
 PWT 3.46 usec  
 IRETCG 1H 24.1 e  
 CTEMPT CDCL3 77.00 ppm  
 SILVNT EXREF  
 BP 0.10 Hz  
 RCGAIN 36

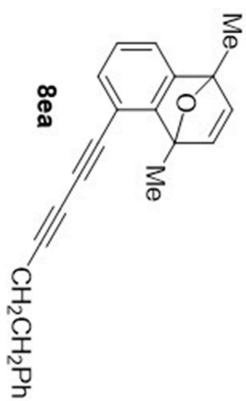

1-(2-Iodo-3-(5-phenethylthiophen-2-yl)phenyl)-3,3-diisopropyltriazen-1-ene (9)

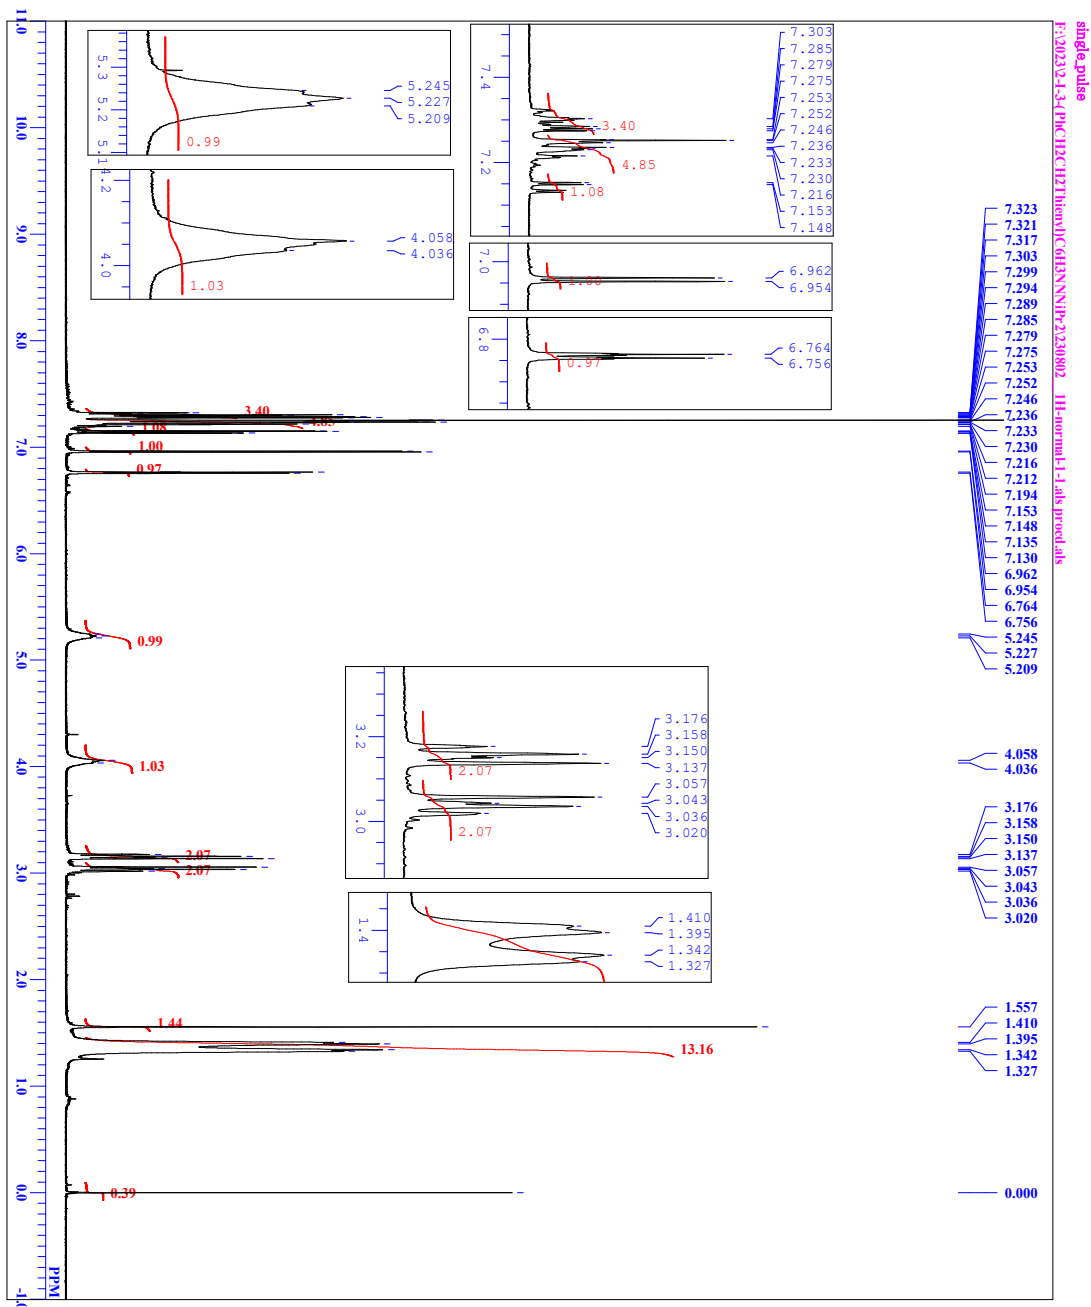

FILE 230892\_1H-normal-1-1als proc1  
 COMIN single\_pulse  
 DATIM 2023-08-02 11:26:59  
 OBNUC 1H  
 EXMID single\_pulse.fxp  
 OBRQO 399.78 MHz  
 OBSF1 419 KHz  
 OBRFN 729 Hz  
 POINT 26214  
 FREQU 600240 Hz  
 SCANS 8  
 ACOUM 4.2673 sec  
 PD 5.0000 sec  
 PWT 3.35 usec  
 IRNUC 1H  
 CTEMP 20.7 c  
 CDCL3 CDCL3  
 SLVNT 0.00 ppm  
 EXREF 0.10 Hz  
 BF 36  
 RGAIN 36

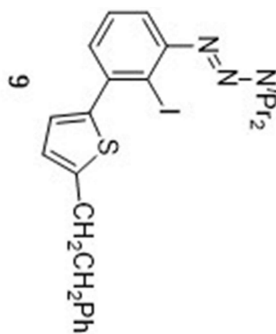

single pulse decoupled gated NOE

F:\2023\2-1-3-Princ\CH2Cl2\Ther\VIC6H13NNN\Pr2\_230802\_E13C-1.1.ms products

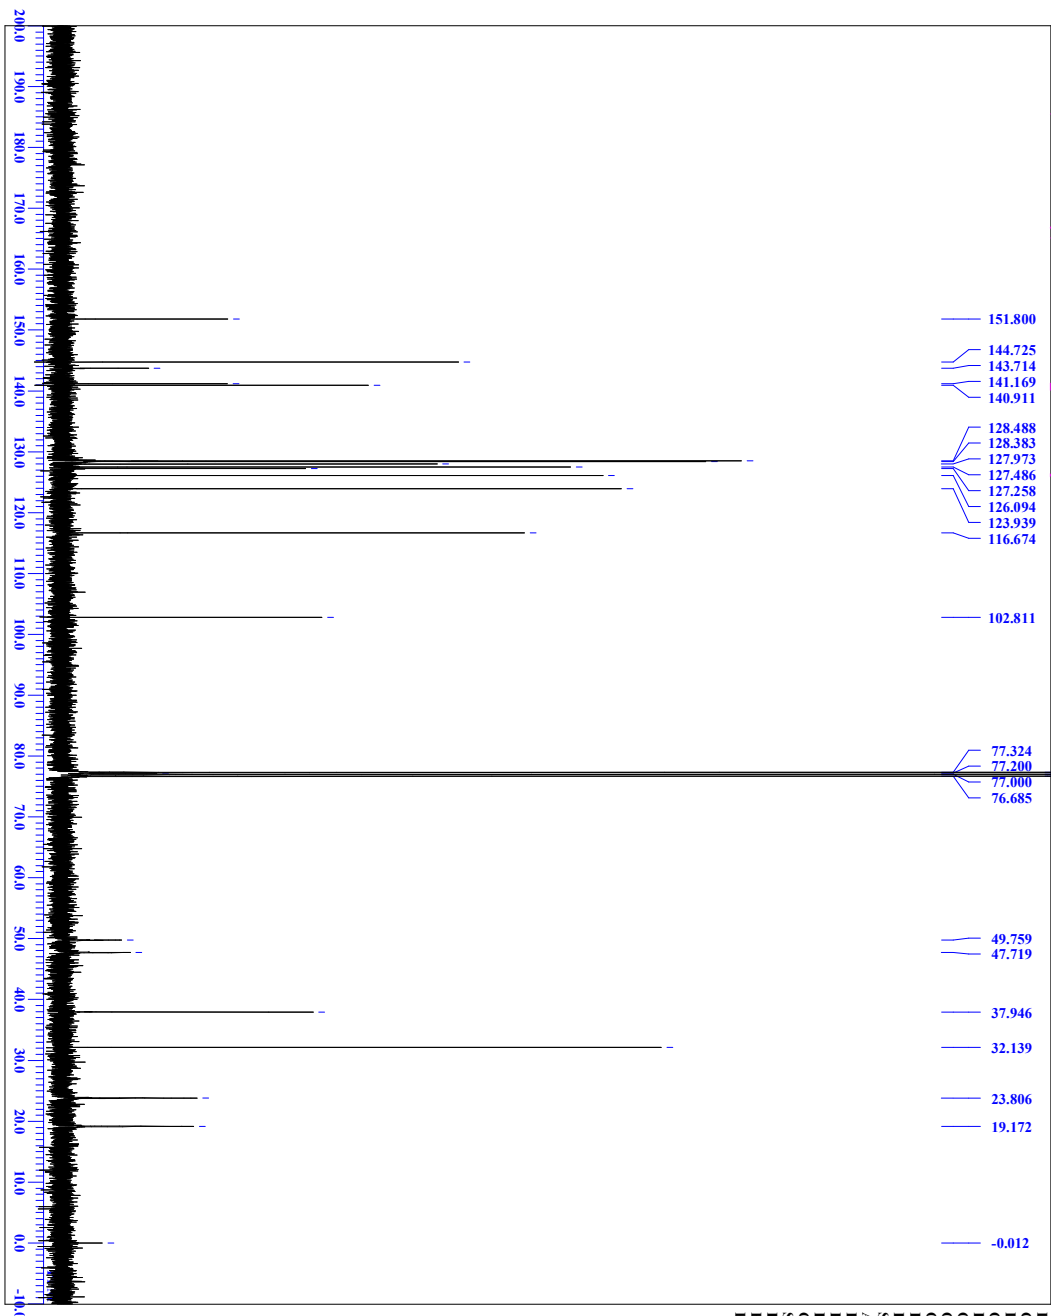

TITLE 230802\_E13C-1.1.ms products  
 CONT single pulse decoupled gated NOE  
 DATE 2023-08-02 11:28:35  
 INSTR 13C  
 EXMETH single\_pulse\_dec  
 OBSPRO 100.53 MHz  
 OBSFREQ 5.35 MHz  
 OBSRES 5.86 Hz  
 PULPROG zgpg30  
 FREQREF 251256.9 Hz  
 SCANS 2048  
 ACQTIME 1.0433 sec  
 PD 2.0000 sec  
 PWD 3.60 usec  
 IRRADIATE 1H  
 CTEMP 20.3 c  
 SLEWING CDCL3  
 SOLVENT 77.00 ppm  
 EXREF 0.10 Hz  
 BP 60  
 RGAIN 60

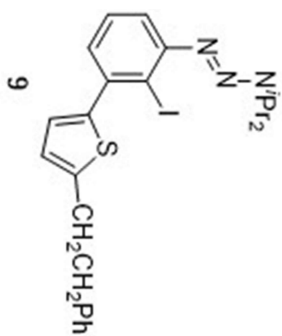

Supplement: d3cc04878k1.pdf [file d3cc04878k1.pdf]
